# Supplementary material
Source: PubMed Central journal article supplement (PMC8652598)
Supplement: jama-e2120714-s001.pdf [file jama-e2120714-s001.pdf]

1       **HIGH-FLOW vs. CONVENTIONAL OXYGEN THERAPY IN**  
2       **PATIENTS WITH ACUTE RESPIRATORY FAILURE DUE TO**  
3       **SARS-CoV-2: The HiFLo-COVID RANDOMIZED CLINICAL**  
4       **TRIAL**

5  
6  
7                       **The HiFLo-COVID collaborative group**

8  
9  
10    This document includes:

- 11           •   HiFLo-COVID Protocol Version 3.0. Date: 02nd January 2.021.
- 12           Approved by: Ethical and Biomedical Research Committee (EBRC) from the  
13           Fundación Valle del Lili, Cali, Colombia
- 14           •   Summary of Changes to the protocol (from VERSION 1.0 to VERSION 3.0)

24

25 **HIGH-FLOW vs. CONVENTIONAL OXYGEN THERAPY IN**  
26 **PATIENTS WITH ACUTE RESPIRATORY FAILURE DUE TO**  
27 **SARS-CoV-2: The HiFlo-COVID RANDOMIZED CLINICAL**  
28 **TRIAL**

29

30

31 **The HiFlo-COVID collaborative group**

32

33

34 Department of Intensive Care, Fundación Valle del Lili, Cali Colombia.

35 Department of Internal Medicine, Division of Infectology. Fundación Valle del Lili Cali Colombia.

36 Universidad Icesi. Cali Colombia.

37

38

39

40

41

42 FUNDACION VALLE DEL LILI. CALI COLOMBIA

43

44

45

46

47

48

VERSION 3.0

49

02<sup>ND</sup> JANUARY 2021.

|    |                                                                                   |           |
|----|-----------------------------------------------------------------------------------|-----------|
| 50 | <b>TABLE OF CONTENT</b>                                                           |           |
| 51 |                                                                                   |           |
| 52 | <b>TABLE OF CONTENT</b>                                                           | <b>3</b>  |
| 53 | <b>SYNOPSIS</b>                                                                   | <b>6</b>  |
| 54 | <b>INTRODUCTION</b>                                                               | <b>11</b> |
| 55 | <b>3. BACKGROUND</b>                                                              | <b>12</b> |
| 56 | <b>3.1. SPECTRUM OF DISEASE</b>                                                   | <b>13</b> |
| 57 | <b>3.2 ACUTE RESPIRATORY FAILURE</b>                                              | <b>15</b> |
| 58 | 3.2.1. GENERAL LINE OF MANAGEMENT: INVASIVE MECHANICAL VENTILATION AND OTHER NON- |           |
| 59 | INVASIVE MODALITIES                                                               | 15        |
| 60 | 3.2.2 USE OF HFNC IN SARS-CoV-2 INFECTION                                         | 16        |
| 61 | <b>4. JUSTIFICATION</b>                                                           | <b>20</b> |
| 62 | <b>5. RESEARCH QUESTION</b>                                                       | <b>21</b> |
| 63 | <b>6. OBJECTIVES</b>                                                              | <b>22</b> |
| 64 | <b>6.1. PRIMARY OBJECTIVE</b>                                                     | <b>22</b> |
| 65 | <b>6.2. SPECIFIC OBJECTIVES</b>                                                   | <b>22</b> |
| 66 | <b>7. HYPOTHESIS</b>                                                              | <b>25</b> |
| 67 | <b>7.1. PRIMARY HYPOTHESIS</b>                                                    | <b>25</b> |
| 68 | <b>7.2. SECONDARY /TERCIARY HYPOTHESES</b>                                        | <b>25</b> |
| 69 | <b>8. OUTCOMES</b>                                                                | <b>27</b> |
| 70 | <b>8.1. PRIMARY OUTCOMES</b>                                                      | <b>27</b> |
| 71 | <b>8.2. SECONDARY AND TERTIARY OUTCOMES / SUBGROUP ANALYSIS</b>                   | <b>27</b> |
| 72 | <b>9. METHODS</b>                                                                 | <b>29</b> |
| 73 | <b>9.1. DESIGN</b>                                                                | <b>29</b> |
| 74 | <b>9.2. STUDY POPULATION</b>                                                      | <b>29</b> |
| 75 | <b>9.3. GROUPS UNDER STUDY</b>                                                    | <b>29</b> |
| 76 | <b>9.4. INCLUSION CRITERIA</b>                                                    | <b>29</b> |
| 77 | <b>9.5. EXCLUSION CRITERIA</b>                                                    | <b>30</b> |
| 78 | <b>9.6. SAMPLE SIZE</b>                                                           | <b>31</b> |
| 79 | <b>9.7. RECRUITMENT STRATEGY</b>                                                  | <b>31</b> |
| 80 | 9.7.1. SCREENING                                                                  | 31        |
| 81 | 9.7.2. RANDOMIZATION                                                              | 32        |
| 82 | 9.7.3. MASKING AND CONCEALMENT                                                    | 32        |
| 83 | 9.8. STATISTICAL ANALYSIS PLAN                                                    | 33        |
| 84 | 9.8.1. ANALYSIS PLAN FOR PRIMARY OUTCOMES                                         | 33        |
| 85 | 9.8.1. ANALYSIS PLAN FOR SECONDARY OUTCOMES                                       | 34        |
| 86 | 9.8.2. INTERIM ANALYSIS PLAN                                                      | 34        |

|     |                                                                                     |           |
|-----|-------------------------------------------------------------------------------------|-----------|
| 87  | <b><u>10. GENERAL MANAGEMENT PROTOCOL</u></b>                                       | <b>35</b> |
| 88  | 10.1. INITIAL APPROACH                                                              | 35        |
| 89  | 10.2. CRITERIA FOR IMMEDIATE INTUBATION (NOT RANDOMIZED PATIENTS)                   | 36        |
| 90  | 10.3. INTERNAL OPERATIONAL CASE DEFINITIONS                                         | 37        |
| 91  | 10.3.1. SUSPECTED MODERATE CASE                                                     | 37        |
| 92  | 10.3.2. SUSPECTED SEVERE CASE                                                       | 37        |
| 93  | 10.2.3. CONFIRMED MODERATE CASE                                                     | 38        |
| 94  | 10.3.4. CONFIRMED SEVERE CASE                                                       | 39        |
| 95  | 10.4. GENERAL PROTOCOL FOR RESPIRATORY SUPPORT                                      | 39        |
| 96  | 10.4.1. HIGH-FLOW NASAL CANNULA (HFNC)                                              | 39        |
| 97  | 10.4.2. CONVENTIONAL OXYGEN THERAPY (OCT)                                           | 40        |
| 98  | 10.5. MONITORING OF RESPIRATORY SUPPORT THERAPY (HFNC vs. COT)                      | 40        |
| 99  | 10.6. FAILURE TO RESPIRATORY SUPPORT THERAPY (HFNC OR COT)                          | 40        |
| 100 | 10.6.1. INTUBATION CRITERIA (FOR PATIENTS INCLUDED IN THE STUDY)                    | 41        |
| 101 | 10.7. ADDITIONAL MANAGEMENT                                                         | 42        |
| 102 | 10.7.1. HEMODYNAMIC                                                                 | 42        |
| 103 | 10.7.2. RENAL                                                                       | 42        |
| 104 | 10.7.3. HEMATOLOGICAL                                                               | 43        |
| 105 | 10.7.4. STEROID USE                                                                 | 43        |
| 106 | 10.7.5. USE OF SEDATION / NEUROMUSCULAR PARALYSIS                                   | 43        |
| 107 | 10.7.6. GLYCEMIC CONTROL                                                            | 44        |
| 108 | <b><u>10.8 GENERAL STUDY FLOW</u></b>                                               | <b>45</b> |
| 109 | <b><u>11. DATA COLLECTION, PATIENT FOLLOW-UP, STUDY MONITORING AND CLINICAL</u></b> |           |
| 110 | <b><u>OUTCOMES.</u></b>                                                             | <b>46</b> |
| 111 | 11.1 COORDINATION, REGISTRATION AND DATA MANAGEMENT                                 | 46        |
| 112 | 11.2. PATIENT MONITORING / ELECTRONIC DATA CAPTURE                                  | 46        |
| 113 | 11.3 BLOOD SAMPLING AND CYTOKINE MEASUREMENT                                        | 47        |
| 114 | 11.4. STUDY COMPLETION                                                              | 47        |
| 115 | 11.5. WITHDRAWAL OF INFORMED CONSENT                                                | 48        |
| 116 | 11.6 FOLLOW-UP SCHEDULE                                                             | 49        |
| 117 | <b><u>12. ETHICAL CONSIDERATIONS</u></b>                                            | <b>51</b> |
| 118 | 12.1. RISK LEVEL (ACCORDING TO RESOLUTION 8430, COLOMBIAN HEALTH MINISTRY)          | 51        |
| 119 | 12.2. INFORMED CONSENT                                                              | 51        |
| 120 | 12.2.1. PROCEDURE FOR TAKING INFORMED CONSENT: LEGAL CONSIDERATIONS                 | 51        |
| 121 | <b><u>13. ADVERSE EVENTS REPORTING</u></b>                                          | <b>58</b> |
| 122 | 13.1. MONITORING OF ADVERSE EVENTS (AE)                                             | 58        |
| 123 | 13.3. DATA SAFETY MONITORING BOARD                                                  | 59        |
| 124 | <b><u>ANNEX 1. INCLUSION / EXCLUSION FORMAT</u></b>                                 | <b>60</b> |
| 125 | <b><u>ANNEX 2. SCREENING FORMAT</u></b>                                             | <b>63</b> |
| 126 | <b><u>ANNEX 3. CASE REPORT FORMAT (CRF)</u></b>                                     | <b>64</b> |
| 127 | 7-CATEGORY ORDINAL SCALE: (*)                                                       | 72        |

|     |                                                |           |
|-----|------------------------------------------------|-----------|
| 128 | <b><u>ANNEX 4. ADVERSE EVENT REPORTING</u></b> | <b>73</b> |
| 129 | <b><u>ADVERSE EVENT REPORT</u></b>             | <b>73</b> |
| 130 | <b><u>REFERENCES</u></b>                       | <b>77</b> |
| 131 | <b><u>SUMMARY OF CHANGES</u></b>               | <b>81</b> |
| 132 | <b><u>VERSIONS AND DATES</u></b>               | <b>82</b> |
| 133 |                                                |           |
| 134 |                                                |           |
| 135 |                                                |           |
| 136 |                                                |           |
| 137 |                                                |           |
| 138 |                                                |           |
| 139 |                                                |           |
| 140 |                                                |           |
| 141 |                                                |           |
| 142 |                                                |           |
| 143 |                                                |           |
| 144 |                                                |           |
| 145 |                                                |           |
| 146 |                                                |           |
| 147 |                                                |           |
| 148 |                                                |           |
| 149 |                                                |           |
| 150 |                                                |           |
| 151 |                                                |           |
| 152 |                                                |           |
| 153 |                                                |           |
| 154 |                                                |           |
| 155 |                                                |           |
| 156 |                                                |           |
| 157 |                                                |           |
| 158 |                                                |           |
| 159 |                                                |           |
| 160 |                                                |           |
| 161 |                                                |           |
| 162 |                                                |           |
| 163 |                                                |           |

164 **SYNOPSIS**

165

166 **HIGH-FLOW vs. CONVENTIONAL OXYGEN THERAPY FOR PATIENTS WITH**  
167 **ACUTE RESPIRATORY FAILURE DUE TO SARS-CoV-2: The HiFlo-COVID**  
168 **RANDOMIZED CLINICAL TRIAL**

| <b>Data category:</b>                       | <b>Information:</b>                                                                                                                                                                                                                                                                                                                                                                                                                                                                                                                                                                                                                                         |
|---------------------------------------------|-------------------------------------------------------------------------------------------------------------------------------------------------------------------------------------------------------------------------------------------------------------------------------------------------------------------------------------------------------------------------------------------------------------------------------------------------------------------------------------------------------------------------------------------------------------------------------------------------------------------------------------------------------------|
| Registration - Study Identification Number: | Fundación Valle del Lili EBRC; protocol number: 1635; approval number: 259 - 2020                                                                                                                                                                                                                                                                                                                                                                                                                                                                                                                                                                           |
| Date of Registration:                       | July 2020.                                                                                                                                                                                                                                                                                                                                                                                                                                                                                                                                                                                                                                                  |
| ClinicalTrials.gov Identifier:              | <a href="https://clinicaltrials.gov/ct2/show/study/NCT04609462">NCT04609462</a>                                                                                                                                                                                                                                                                                                                                                                                                                                                                                                                                                                             |
| Main Sponsor:                               | Centro de Investigaciones Clínicas – Fundación Valle del Lili. Cali, Colombia.                                                                                                                                                                                                                                                                                                                                                                                                                                                                                                                                                                              |
| Contact for public consultation:            | +57 (2) 331 90 90 Ext. 4022.                                                                                                                                                                                                                                                                                                                                                                                                                                                                                                                                                                                                                                |
| Contact for scientific consultation:        | <a href="mailto:gusospin@gmail.com">gusospin@gmail.com</a>                                                                                                                                                                                                                                                                                                                                                                                                                                                                                                                                                                                                  |
| Public title:                               | HiFlo-COVID.                                                                                                                                                                                                                                                                                                                                                                                                                                                                                                                                                                                                                                                |
| Scientific title:                           | HIGH-FLOW vs. CONVENTIONAL OXYGEN THERAPY FOR PATIENTS WITH ACUTE RESPIRATORY FAILURE DUE TO SARS-CoV-2: The HiFlo-COVID RANDOMIZED CLINICAL TRIAL                                                                                                                                                                                                                                                                                                                                                                                                                                                                                                          |
| Coordinator Center:                         | Fundación Valle del Lili. Cali, Colombia .                                                                                                                                                                                                                                                                                                                                                                                                                                                                                                                                                                                                                  |
| Recruitment centers:                        | 3 (Colombia)                                                                                                                                                                                                                                                                                                                                                                                                                                                                                                                                                                                                                                                |
| Health Condition or Problem:                | Severe SARS-CoV-2 infection.                                                                                                                                                                                                                                                                                                                                                                                                                                                                                                                                                                                                                                |
| Type of Study:                              | Open (non-blind), randomized, controlled, Phase II clinical trial.                                                                                                                                                                                                                                                                                                                                                                                                                                                                                                                                                                                          |
| Primary Objective:                          | To evaluate the impact of using high-flow oxygen through a nasal cannula vs. conventional oxygen therapy on the need for intubation/support with invasive mechanical ventilation and clinical status as assessed by a 7-category ordinal scale in patients with acute hypoxemic respiratory failure secondary to severe Covid-19                                                                                                                                                                                                                                                                                                                            |
| Specific Objectives:                        | <p><u>Secondary Objectives</u></p> <p>Efficiency</p> <ul style="list-style-type: none"> <li>• To evaluate the impact of high-flow oxygen therapy through a nasal cannula (HFNC) vs. conventional oxygen therapy (COT) on the requirement of early intubation and invasive mechanical ventilation support.</li> <li>• To assess the impact of HFNC vs. COT on mechanical ventilation-free days.</li> <li>• Assess the impact of HFNC vs. COT on renal replacement therapy-free days.</li> <li>• To assess differences in length of hospital/ICU stay between study groups.</li> <li>• To assess differences in all-cause mortality at days 14 and</li> </ul> |

| <b>Data category:</b> | <b>Information:</b>                                                                                                                                                                                                                                                                                                                                                                                                                                                                                                                                                                                                                                                                                                                                                                                                                                                                                                                                                                                                                                                                                                                                                                                                                                                                                                                                                                                                                                                                                                                                                                                                                                                                                                                                                                                                                                                                                                                                                                                                                                                                                                                                                                                                                                                                                                                                                                                                                                                                                                                                                                                                                                                                                          |
|-----------------------|--------------------------------------------------------------------------------------------------------------------------------------------------------------------------------------------------------------------------------------------------------------------------------------------------------------------------------------------------------------------------------------------------------------------------------------------------------------------------------------------------------------------------------------------------------------------------------------------------------------------------------------------------------------------------------------------------------------------------------------------------------------------------------------------------------------------------------------------------------------------------------------------------------------------------------------------------------------------------------------------------------------------------------------------------------------------------------------------------------------------------------------------------------------------------------------------------------------------------------------------------------------------------------------------------------------------------------------------------------------------------------------------------------------------------------------------------------------------------------------------------------------------------------------------------------------------------------------------------------------------------------------------------------------------------------------------------------------------------------------------------------------------------------------------------------------------------------------------------------------------------------------------------------------------------------------------------------------------------------------------------------------------------------------------------------------------------------------------------------------------------------------------------------------------------------------------------------------------------------------------------------------------------------------------------------------------------------------------------------------------------------------------------------------------------------------------------------------------------------------------------------------------------------------------------------------------------------------------------------------------------------------------------------------------------------------------------------------|
|                       | <p>28 post-randomization, between study groups</p> <p>Safety</p> <ul style="list-style-type: none"> <li>• To assess the occurrence / proportion of patients with severe adverse events within 28 days from randomization.</li> <li>• To assess the occurrence / proportion of bacterial / fungal infections within 28 days from randomization.</li> </ul> <p><u>Tertiary Objectives</u></p> <ul style="list-style-type: none"> <li>• To evaluate the differences in the evolvement of oxygen flow requirement and PaO<sub>2</sub>/FiO<sub>2</sub> ratio between groups</li> <li>• To evaluate the differences for the time elapsed from randomization to intubation / invasive mechanical ventilation support in patients failing to high-flow oxygen therapy and conventional oxygen therapy</li> <li>• To evaluate the impact of HFNC vs. COT on the clinical condition at day 28</li> <li>• To evaluate the impact of HFNC vs. COT on the development and evolution of multiorgan dysfunction as assessed by the SOFA score.</li> <li>• To evaluate the impact of HFNC vs. COT on the development and evolution of extra-pulmonary organ dysfunction as assessed by extra-pulmonary SOFA score</li> <li>• To evaluate the differences in HACOR and ROX scores at 2 and 4 hours post-randomization between the groups and their relationship with requiring intubation and mechanical ventilation-free days</li> <li>• To assess differences in IL-6 and IL-8 kinetics within 7 days from randomization, between study groups</li> <li>• To assess differences in ferritin kinetics, LDH, leukocyte count, neutrophil/lymphocyte count relationship, platelet count and D-dimer during the 7 days following randomization, between study groups</li> </ul> <p><u>For Predefined Subgroups</u></p> <ul style="list-style-type: none"> <li>• To assess the impact of high-flow oxygen vs. conventional oxygen therapy on the need for intubation / invasive ventilation support and the time to clinical recovery (as assessed by a 7-category ordinal scale) in patients with initial PaO<sub>2</sub>/FiO<sub>2</sub> ratio &gt; and &lt; 100 mmHg.</li> <li>• To assess the impact of high-flow oxygen vs. conventional oxygen therapy on the need for intubation / invasive ventilation support and the time to clinical recovery (as assessed by a 7-category ordinal scale) in patients with baseline IL-6 levels &gt; and &lt; 100 pg/mL.</li> <li>• To assess the impact of high-flow oxygen vs. conventional oxygen therapy on the need for intubation / invasive ventilation support and the time to clinical recovery (as assessed by a 7-category ordinal scale) in patients aged &gt;</li> </ul> |

| Data category:      | Information:                                                                                                                                                                                                                                                                                                                                                                                                                                                                                                                                                                                                                                                                                                                                                                                                                                                                                                                                                                                                                                                                                                                                                                                                                                                                                                                                                                                                                                                                          |
|---------------------|---------------------------------------------------------------------------------------------------------------------------------------------------------------------------------------------------------------------------------------------------------------------------------------------------------------------------------------------------------------------------------------------------------------------------------------------------------------------------------------------------------------------------------------------------------------------------------------------------------------------------------------------------------------------------------------------------------------------------------------------------------------------------------------------------------------------------------------------------------------------------------------------------------------------------------------------------------------------------------------------------------------------------------------------------------------------------------------------------------------------------------------------------------------------------------------------------------------------------------------------------------------------------------------------------------------------------------------------------------------------------------------------------------------------------------------------------------------------------------------|
|                     | and < 60 years.                                                                                                                                                                                                                                                                                                                                                                                                                                                                                                                                                                                                                                                                                                                                                                                                                                                                                                                                                                                                                                                                                                                                                                                                                                                                                                                                                                                                                                                                       |
| Study design:       | Multicenter, randomized, open-label, controlled study on the use of high-flow oxygen therapy through a nasal cannula vs. conventional oxygen therapy in patients with moderate / severe hypoxemic respiratory failure due to SARS-CoV-2 infection.                                                                                                                                                                                                                                                                                                                                                                                                                                                                                                                                                                                                                                                                                                                                                                                                                                                                                                                                                                                                                                                                                                                                                                                                                                    |
| Intervention group: | High-Flow oxygen therapy through a nasal cannula (HFNC).                                                                                                                                                                                                                                                                                                                                                                                                                                                                                                                                                                                                                                                                                                                                                                                                                                                                                                                                                                                                                                                                                                                                                                                                                                                                                                                                                                                                                              |
| Control:            | Conventional oxygen therapy (COT).                                                                                                                                                                                                                                                                                                                                                                                                                                                                                                                                                                                                                                                                                                                                                                                                                                                                                                                                                                                                                                                                                                                                                                                                                                                                                                                                                                                                                                                    |
| Co-Interventions:   | Usual care (hemodynamic / respiratory / metabolic / hematological / general).                                                                                                                                                                                                                                                                                                                                                                                                                                                                                                                                                                                                                                                                                                                                                                                                                                                                                                                                                                                                                                                                                                                                                                                                                                                                                                                                                                                                         |
| Population:         | Adult patients (>18 years) admitted to the emergency room or Intensive Care Unit (ICU) with moderate / severe acute hypoxemic respiratory failure secondary to SARS-CoV-2 infection.                                                                                                                                                                                                                                                                                                                                                                                                                                                                                                                                                                                                                                                                                                                                                                                                                                                                                                                                                                                                                                                                                                                                                                                                                                                                                                  |
| Inclusion Criteria: | <ul style="list-style-type: none"> <li>• Adults &gt; 18 years old.</li> <li>• Emergency or ICU admission under suspected / confirmed SARS-CoV-2 infection.</li> <li>• Moderate/severe acute respiratory failure:               <ul style="list-style-type: none"> <li>- PaO<sub>2</sub>/FiO<sub>2</sub> &lt; 200.</li> <li>- Use of accessory muscles.</li> <li>- Breathing rate &gt; 25 per minute.</li> </ul> </li> <li>• Having a progression &lt; 6 hours since fulfilling definition of moderate or severe acute respiratory failure due to suspected or confirmed SARS-CoV-2 infection.</li> </ul>                                                                                                                                                                                                                                                                                                                                                                                                                                                                                                                                                                                                                                                                                                                                                                                                                                                                              |
| Exclusion Criteria  | <ul style="list-style-type: none"> <li>• &lt; 18 years.</li> <li>• Indication for immediate tracheal intubation.</li> <li>• Pregnant woman / positive pregnancy test at the time of potential inclusion.</li> <li>• Chronic liver disease / liver cirrhosis Child-Pugh C.</li> <li>• Confirmation of active bacterial or fungal infection.</li> <li>• Uncontrolled HIV/AIDS disease (defined by presence of viral load &gt; 200 copies/mL).</li> <li>• Previous history of COPD Gold C – D.</li> <li>• History of COPD requiring hospitalization or ICU admission during the last year.</li> <li>• History of congestive heart failure NYHA III – IV.</li> <li>• History or actual left ventricular ejection fraction &lt; 45%</li> <li>• Highly suspected or confirmed cardiogenic pulmonary edema.</li> <li>• Hypercapnic respiratory failure (PaCO<sub>2</sub> &gt; 55 mmHg).</li> <li>• History or high suspicion of central or peripheral demyelinating disorders at the time of potential inclusion.</li> <li>• Imminence of death within the next 24 hours (according to investigator’s clinical judgment)</li> <li>• Any serious medical condition or clinical laboratory test abnormality that, at the investigator’s judgment, prevents safe patient participation and completion of the study.</li> <li>• Participation in another clinical trial (except other related to SARS-CoV-2. These criteria will be always discussed among steering committee members</li> </ul> |
| Sample Size         | 220 patients (110 by arm).                                                                                                                                                                                                                                                                                                                                                                                                                                                                                                                                                                                                                                                                                                                                                                                                                                                                                                                                                                                                                                                                                                                                                                                                                                                                                                                                                                                                                                                            |



| Data category:                                    | Information:                                                                                                                                                                                                                                                                                                                                                                                                                                                                                                                                                                                                                                                                                                                                                                                                                                                                                                                                                                                                                                                                                                                                                                                                                                                                                                                                                                                                                                                                                                                                                                                                                                                                                                                                                                                                                                                                                                                                     |
|---------------------------------------------------|--------------------------------------------------------------------------------------------------------------------------------------------------------------------------------------------------------------------------------------------------------------------------------------------------------------------------------------------------------------------------------------------------------------------------------------------------------------------------------------------------------------------------------------------------------------------------------------------------------------------------------------------------------------------------------------------------------------------------------------------------------------------------------------------------------------------------------------------------------------------------------------------------------------------------------------------------------------------------------------------------------------------------------------------------------------------------------------------------------------------------------------------------------------------------------------------------------------------------------------------------------------------------------------------------------------------------------------------------------------------------------------------------------------------------------------------------------------------------------------------------------------------------------------------------------------------------------------------------------------------------------------------------------------------------------------------------------------------------------------------------------------------------------------------------------------------------------------------------------------------------------------------------------------------------------------------------|
| Randomization method                              | Permuted blocks of size 4 and 6, stratified by center.                                                                                                                                                                                                                                                                                                                                                                                                                                                                                                                                                                                                                                                                                                                                                                                                                                                                                                                                                                                                                                                                                                                                                                                                                                                                                                                                                                                                                                                                                                                                                                                                                                                                                                                                                                                                                                                                                           |
| Primary outcomes                                  | <ul style="list-style-type: none"> <li>• Need for intubation / invasive mechanical ventilation support (time frame: 28 days).</li> <li>• Clinical recovery as assessed by a 7-category ordinal scale (time frame: 28 days).</li> </ul>                                                                                                                                                                                                                                                                                                                                                                                                                                                                                                                                                                                                                                                                                                                                                                                                                                                                                                                                                                                                                                                                                                                                                                                                                                                                                                                                                                                                                                                                                                                                                                                                                                                                                                           |
| Secondary – tertiary outcomes / subgroup analysis | <p><u>Secondary Outcomes</u></p> <p>Efficiency</p> <ul style="list-style-type: none"> <li>• Early requirement of intubation / invasive mechanical ventilation support (time frame: 7 days – 14 days).</li> <li>• Mechanical ventilation-free days (time frame: 28 days).</li> <li>• Renal replacement therapy-free days (time frame: 28 days)</li> <li>• Length of ICU stay (time frame: 28 days)</li> <li>• Length of hospital stay (time frame: 28 days)</li> <li>• Hospital mortality – all causes (time frame: 14 and 28 days)</li> </ul> <p>Safety</p> <ul style="list-style-type: none"> <li>• Occurrence / proportion of patients with serious adverse events (time frame: 28 days)</li> <li>• Occurrence / proportion of bacterial - fungal infections (time frame: 28 days).</li> </ul> <p><u>Tertiary Outcomes</u></p> <ul style="list-style-type: none"> <li>• Evolvement of oxygen flow requirement and PaO<sub>2</sub>/FiO<sub>2</sub> ratio (time frame: 7 days)</li> <li>• Time elapsed from randomization to intubation / invasive mechanical ventilation support in patients failing to high-flow oxygen therapy and conventional oxygen therapy (time frame: 28 days).</li> <li>• Clinical condition at day-28 (time frame: 28 days).</li> <li>• Evolvement of multiorgan dysfunction as assessed by SOFA score (time frame: 14 days)</li> <li>• Evolvement of extra-pulmonary organ dysfunction as assessed by extra-pulmonary SOFA score (time frame: 14 days).</li> <li>• HACOR and ROX scores at 2- and 4-hours post-randomization and their relation with requirement of intubation (time frame: 28 days)</li> <li>• Differences in time-course of IL-6 and IL-8 between study groups (time frame: 7 days)</li> <li>• Differences in time-course of ferritin, LDH, leukocyte count, neutrophil to lymphocyte count relationship, platelet count, and D-dimer among the groups under study (time frame: 7 days)</li> </ul> |

| Data category:              | Information:                                                                                                                                                                                                                                                                                                                                                                                                                                                                                                                                                                                                                                                                                                                                                                                                                                                                                                                                                                                                                                                                                                                                                                                                                                                                                                                                                                                                                                                                                                                                                                                                                                                                                                                                                                                                                |
|-----------------------------|-----------------------------------------------------------------------------------------------------------------------------------------------------------------------------------------------------------------------------------------------------------------------------------------------------------------------------------------------------------------------------------------------------------------------------------------------------------------------------------------------------------------------------------------------------------------------------------------------------------------------------------------------------------------------------------------------------------------------------------------------------------------------------------------------------------------------------------------------------------------------------------------------------------------------------------------------------------------------------------------------------------------------------------------------------------------------------------------------------------------------------------------------------------------------------------------------------------------------------------------------------------------------------------------------------------------------------------------------------------------------------------------------------------------------------------------------------------------------------------------------------------------------------------------------------------------------------------------------------------------------------------------------------------------------------------------------------------------------------------------------------------------------------------------------------------------------------|
|                             | <p><u>Subgroup Analysis</u></p> <ul style="list-style-type: none"> <li>• Time to intubation / invasive mechanical ventilation and clinical recovery in subgroups with baseline PaO<sub>2</sub>/FiO<sub>2</sub> &gt; and &lt; 100 mmHg (time frame: 28 days)</li> <li>• Time to intubation / invasive mechanical ventilation and clinical recovery in subgroups with baseline IL-6 &gt; and &lt; 100 pg/mL (time frame: 28 days)</li> <li>• Time to intubation / invasive mechanical ventilation and clinical recovery in subgroups aged &gt; and &lt; 60 years (time frame: 28 days)</li> </ul>                                                                                                                                                                                                                                                                                                                                                                                                                                                                                                                                                                                                                                                                                                                                                                                                                                                                                                                                                                                                                                                                                                                                                                                                                             |
| <p>Statistical analysis</p> | <p>The effect of the treatment on the primary outcome requirement of intubation / invasive mechanical ventilation support will be calculated by using a Cox proportional hazard model adjusted by age, initial PaO<sub>2</sub>/FiO<sub>2</sub> and comorbidities (diabetes, hypertension, obesity BMI ≥ 30). The results will be reported as hazard ratios with 95% confidence intervals and represented in Kaplan-Meier curves. This same analysis will be performed separately on those individuals who meet the definition of moderate and severe confirmed cases.</p> <p>Time to clinical improvement was defined as time elapsed from randomization until the first day, during the 28 days after enrollment, on which a patient attained a reduction in two or more points in the modified ordinal 7-category scale. The effect size of the allocated therapy on the time to recovery was assessed by computing the hazard ratio with its 95% confidence interval (CI) as estimated from Cox proportional hazard model stratified by age, hypoxemia severity, and comorbidities. Such analysis will be constructed for the overall population and also stratified according to baseline 7-category ordinal scale at enrollment (i.e., scores of 4 or 5), and plotted in Kaplan-Meier curves.</p> <p>All the analysis will be performed on an intention-to-treat basis with no exclusion after randomization except exclusions for withdrawn consent, according to the local regulations. In addition, some predefined subgroups will be analyzed:</p> <ul style="list-style-type: none"> <li>- Age group: &lt;60 years and ≥60 years.</li> <li>- IL-6 at randomization: &lt;100 and ≥100 pg/mL.</li> <li>- PaO<sub>2</sub>/FiO<sub>2</sub> initial &lt;150 and ≥150.</li> </ul> <p>Significance level will be 5%.</p> |
| <p>Keywords</p>             | <p>High-flow nasal cannula, high-flow oxygen therapy, conventional oxygen therapy, oxygen therapy, acute hypoxemic respiratory failure, severe hypoxemia, SARS-CoV-2 infection, Covid-19.</p>                                                                                                                                                                                                                                                                                                                                                                                                                                                                                                                                                                                                                                                                                                                                                                                                                                                                                                                                                                                                                                                                                                                                                                                                                                                                                                                                                                                                                                                                                                                                                                                                                               |

## 169 INTRODUCTION

170 In early December 2010, a new coronavirus designated as SARS-CoV-2 caused a local  
171 outbreak in Hubei Province (China) that ultimately spread to more than 190 countries  
172 causing a new pandemic situation, officially designated as such by the World Health  
173 Organization on 11 March 2020 (1). Although mortality associated with SAR-CoV-2  
174 disease was initially estimated at 0.1% in mild cases and 8.1% in severe cases (2), this  
175 number has been substantially variable among different regions and countries, being  
176 unclear whether this represents the effect of insufficient sampling (unreliable  
177 denominators) or clinical susceptibility inherent to some population groups (3). Factors  
178 such as age (4) and the presence of co-morbidities (5) would appear to be determinants in  
179 developing more severe forms of disease and unfavorable outcomes. Meanwhile, using  
180 some cardiovascular drugs such as angiotensin converting enzyme inhibitors and  
181 angiotensin receptor blockers would not appear to play a significant role in both the  
182 severity and survival probabilities (6, 7). Other data suggest that severity of inflammation  
183 determined by interleukin-6 (IL-6) levels and the activation of the coagulation system  
184 reflected by elevated D-dimer levels appear to be determinants in developing more severe  
185 forms of disease leading to worse clinical outcomes (8, 9).

186 Data from 72,314 cases of SARS-CoV-2 disease from China revealed that 14% of patients  
187 were classified to have a severe disease (i.e., dyspnea, respiratory rate > 30/min, SpO<sub>2</sub>  
188 <93%, PaO<sub>2</sub>/FiO<sub>2</sub> < 300 and/or pulmonary infiltrates >50% within 24-48 hours), while  
189 5% were classified as critical (i.e., respiratory failure, septic shock and/or multiorgan  
190 dysfunction) (10). In this series, mortality was 2.3% among all confirmed cases and 49%  
191 among those classified as critical (10). Data from 12 hospitals in the New York area  
192 showed that 14.2% of patients required intensive care unit management, while 12.2%  
193 required invasive mechanical ventilation (11). Remarkably, 88.1% of patients subjected to  
194 invasive ventilatory support had died at the time of the study report (11), which raised  
195 serious concerns about the ventilation strategies in patients with severe SARS-CoV-2  
196 infection.

197 Up to the time this research protocol was prepared, no therapeutic or supportive  
198 intervention had demonstrated to modify clinical outcomes in severe SARS-CoV-2  
199 infection. In fact, management of moderate and severe forms of SARS-CoV-2 infection  
200 currently relies on expert recommendations, mostly without a high level of evidence

201 supporting them (12, 13). Until now, use of antiviral drug has led to disappointing results  
202 in predominantly mild- and moderate forms of disease (14). A study on the use of  
203 remdesivir in 1063 patients with SARS-CoV-2 infection led to a highly questionable  
204 decrease in symptom duration, without impacting the recovery of those patients with a  
205 higher requirement for oxygen support, non-invasive mechanical ventilation and invasive  
206 mechanical ventilation (15). Finally, observational results about the use of  
207 hydroxychloroquine alone or in combination with azithromycin suggested its lack of  
208 efficacy to control SARS-CoV-2 infection (16, 17), while another observational study  
209 suggested potential harm related to ST segment prolongation when high doses of  
210 hydroxychloroquine are used (18). Importantly, chloroquine-related cardiovascular risk  
211 would be confirmed in a randomized trial in hospitalized patients with SARS-CoV-2  
212 infection when those receiving high doses of the drug showed an excess of major adverse  
213 cardiovascular events (19).

214 Beyond general supportive measures, there are as yet no specific medications or  
215 interventions able to modify the course of severe SARS-CoV-2 disease. However, given the  
216 respiratory nature of the infection, respiratory support is a key component in its  
217 management. Throughout the development of the pandemic, the need for invasive  
218 mechanical ventilation has been emphasized and, in fact, government agencies around the  
219 world have responded almost unanimously by trying to increase the capacity and number  
220 of mechanical ventilation devices in their hospital networks. However, other non-invasive  
221 respiratory support devices such as high-flow nasal cannula could be useful in the  
222 management of hypoxemic respiratory failure secondary to SARS-CoV-2 infection.  
223 Nevertheless, the role of high-flow oxygen therapy has not been widely studied in Covid-  
224 19. Thus, the present study aims to evaluate the role of high flow oxygen through a nasal  
225 cannula vs. conventional oxygen therapy in patients with moderate and severe acute  
226 hypoxemic respiratory failure in patients with severe Covid-19.

227

### 228 **3. BACKGROUND**

229

230 Coronaviruses (CoV) are a large family of respiratory viruses able to cause respiratory  
231 manifestations in a wide range of severity: from a syndrome similar to the common cold

232 up to severe manifestations such as the Middle East Respiratory Syndrome (MERS) (20)  
233 and Severe Acute Respiratory Syndrome (SARS) (21-23). These latter are considered as  
234 zoonotic diseases able to induce fatal infections at the lower respiratory tract as well as  
235 severe extra pulmonary manifestations. The new coronavirus, designated SARS-CoV-2, is a  
236 member of the Beta-CoV line B that was identified in Hubei Province in China by local  
237 health agencies (24). SARS-CoV-2 has a genome sequence 75-80% identical to its  
238 predecessor, SARS-CoV (25). SARS-CoV was responsible for an outbreak of severe  
239 respiratory infection that began in Guandong Province, China in 2002, causing more than  
240 8,000 cases and about 774 deaths in 26 countries on 5 continents (21-23); meanwhile,  
241 other outbreak of coronavirus caused the MERS epidemic (20), resulting in 1879 cases and  
242 659 deaths in 27 countries. Although an apparent initial zoonotic contamination was  
243 identified in the current SARS-CoV-2 outbreak, transmission among humans from the  
244 same family, hospitals and special care environments have also been reported (26-28).  
245 The virus spread globally during the following weeks after its first report in China and  
246 subsequently, World Health Organization declared a pandemic alert by the 11 March 2020  
247 (1). The number of cases of SARS-CoV-2 infection increased rapidly, reaching a total of  
248 10,145,791 cases and 501,898 deaths worldwide by June 29, 2020.

249

### 250 3.1. Spectrum of disease

251 According to data from 72,314 cases of SARS-CoV-2 disease in China, 44,672 (62%) were  
252 confirmed through genomic screening tests (10). Meanwhile, 16,186 (22%) were declared  
253 as suspected cases based on the presence of symptoms and exposure (absence of genomic  
254 detection due to logistical problems); other 10,567 (15%) were classified clinically (based  
255 on symptoms, exposure and presence of images compatible with SARS-CoV-2 infection)  
256 and 889 (1%) were considered as asymptomatic patients (positive genomic detection in  
257 the absence of symptoms such as fever, dry cough and fatigue). SARS-CoV-2 induces a  
258 wide range of severity, with mild disease representing most of the cases (81%).  
259 Meanwhile, 14% induce a severe disease (i.e., dyspnea, respiratory rate > 30/min, SpO<sub>2</sub>  
260 <93%, PaO<sub>2</sub>/FiO<sub>2</sub> < 300 and/or pulmonary infiltrates >50% within 24-48 hours), while  
261 5% led to critical disease (i.e., respiratory failure, septic shock and/or multiorgan  
262 dysfunction) (10).

263 In general terms, disease induced by SARS-CoV-2 shows a time-course that could be  
264 summarized in three phases:

265

266 1. Phase 1 (or early phase): characterized by the immune response to the virus, usually  
267 within the first 5 to 8 days. Typical symptoms include fever 80%, dry cough 50%, mild  
268 dyspnea 60%, fatigue 60%, diarrhea and other gastrointestinal symptoms 50%.  
269 Laboratory abnormalities include lymphopenia, increased D-dimer, LDH and ferritin  
270 levels. Viral load increases during this phase in some individuals. Nevertheless, most  
271 patients experience a significant drop in viral load at the end of this phase, although this  
272 may vary among patients. Potential antiviral therapies (i.e., remdesivir, favipiravir),  
273 hydroxychloroquine, azithromycin, and others, have been reported to be most useful in  
274 this early phase (although with not successful clinical results).

275 2. Phase 2 (or pulmonary phase): characterized by moderate symptoms from day 10 to  
276 day 14. Laboratory abnormalities include mild increase in aminotransferases and  
277 procalcitonina levels. Lymphopenia may be pronounced. During this phase oxygen might  
278 be needed and sometimes, clinical deterioration occurs. This phase represents a breaking  
279 point for development of severe complications in some individuals. Most of them persist  
280 with detectable viral loads during this phase.

281

282 3. Phase 3 (or hyper-inflammation phase): A minority of COVID-19 patients will  
283 transition into the third and most severe stage of the illness, which manifests as an  
284 extrapulmonary systemic hyperinflammation syndrome. Usually appearing after day 14.  
285 Main feature is severe hypoxemia. Bacterial superinfections may occur in some cases.  
286 Interleukin-6 (IL-6), ferritin and LDH can increase. Cardiac involvement and  
287 prothrombotic phenomena may also occur. Mortality in patients attaining this phase is  
288 high. Using immunomodulatory drugs could be promising.

289

290 Initial phases are characterized by large viral replication, presence of mild symptoms,  
291 lymphopenia, increased inflammatory markers and activation of coagulation system (29).  
292 Over time, the immune response of the host takes on progressive importance, since it is  
293 actually the inflammatory response that determines the appearance of progressively more

294 severe manifestations of the disease. Thus, it seems logical that during phase 1 and initial  
295 part of phase 2, therapies aimed to control viral replication could have a great impact;  
296 meanwhile, in the transition from phase 2 to phase 3, and during this latter, therapy  
297 should aim to modulate the immune response by the host.

298

299

## 300 3.2 Acute respiratory failure

301

302 Acute hypoxemic respiratory failure is a pathological condition characterized by altered  
303 oxygenation demonstrated by a decrease in oxygen blood pressure ( $PaO_2$ ) < 60 mmHg,  
304 oxygen saturation ( $SaO_2$ ) < 90% or  $PaO_2/FiO_2$  index < 300. This syndrome has different  
305 etiologies and pathophysiological mechanisms; however, regardless of its origin, therapy  
306 of hypoxemia is primarily based on the administration of supplemental oxygen as  
307 supportive therapy while the triggering cause is resolved.

308

### 309 3.2.1. General line of management: invasive mechanical ventilation and other non- 310 invasive modalities

311

312 In most cases, initial oxygen therapy can be provided through devices delivering oxygen at  
313 low flow rates (conventional nasal cannula, simple face mask, Venturi mask and reservoir  
314 mask). Nevertheless, unresponsive cases to these initial support strategies will require  
315 other support modalities as non-invasive and invasive mechanical ventilation.  
316 Nonetheless, although invasive mechanical ventilation (IMV) provides oxygen and relieves  
317 respiratory load, IMV may be associated with complications widely described in the  
318 literature, including those related to intubation, immobility due to the use of sedatives and  
319 neuromuscular blockers, and lung injury induced by mechanical ventilation itself (30). In  
320 fact, other authors have recognized their effects on mortality (31). Accordingly, a  
321 metaanalysis including several studies investigating the role of non-invasive mechanical  
322 ventilation (NIMV) in patients with acute hypoxemic respiratory failure suggested some  
323 potential effect on decrease the need for intubation but not in other clinical outcomes (32,  
324 33). Nevertheless, up to 50% of NIV treatment failure has been described in the subgroup  
325 of hypoxemic respiratory failure (5) and high mortality associated with such treatment  
326 failure (6).

327

328 High-Flow oxygen therapy through a Nasal Cannula (HFNC) is another therapeutic  
329 modality to provide respiratory support. HFNC delivers a mixture of heated and  
330 humidified air and oxygen at concentrations between 21 and 100%, and flows between 60  
331 - 80 liters/minute. HFNC allows better coupling with inspiratory demands of patients in  
332 respiratory failure by avoiding dilution of the delivered oxygen and ensuring a  
333 programmed oxygen concentration. It has other physiological effects such as maintenance  
334 of mucociliary function and clearance of secretions, decreases energy consumption due to  
335 heat loss, and produces a CO<sub>2</sub> washout at the level of the upper airway, which has the  
336 effect of reducing dead space (34). Although it has historically been used in the pediatric  
337 population, its use has increased in critically ill adults in the last decade.

338

339 HFNC is other non-invasive support strategy that can overcome limitations offer by  
340 conventional oxygen therapy and NIMV. A meta-analysis on the use of HFNC during  
341 hypoxemic respiratory failure included the 9 best quality clinical trials performed to date,  
342 with a total of 2093 patients (35). Five of such studies were conducted in the ICU (36-40)  
343 and four in the emergency department (41-44) (see Table 1). Criteria used to define  
344 hypoxemia were different: some used a single parameter (SO<sub>2</sub>, PaO<sub>2</sub>, or PaO<sub>2</sub>/FiO<sub>2</sub>),  
345 while others used a combination of these three parameters. Duration of intervention and  
346 outcomes proposed were different in all of these studies, being the need for IMV or  
347 escalation of therapy the most common. Comfort and relief of dyspnea were also  
348 evaluated, and only five reported complications, which did not allow inferring data for  
349 meta-analyses of this aspect. The sample size was also highly variable, ranging from 14 to  
350 778 patients, and causes leading to hypoxemic respiratory failure were also diverse, being  
351 chronic obstructive pulmonary disease (COPD), pneumonia and pulmonary edema, the  
352 most common. As a result, this meta-analysis found that HFNC might decrease the need for  
353 intubation with an absolute reduction of 4.4%, with no impact on mortality. Finally,  
354 authors concluded that future research should be focused on special subgroups potentially  
355 benefiting from using HFNC.

356

### 357 3.2.2 Use of HFNC in SARS-CoV-2 infection

358

359 Evidence on the use of HFNC in patients with acute hypoxemic respiratory failure due to  
360 SARS-CoV-2 infection is limited, as only some case reports have been reported suggesting



361 its potential benefit. Nevertheless, some scientific societies worldwide have recommended  
362 using HFNC in patients not responding to conventional oxygen therapy based on evidence  
363 from hypoxemic respiratory failure from other etiologies (12, 45, 46) and recognizing that  
364 reducing the need for intubation could be an important objective during a pandemic  
365 context (47).

366 A case series of 17 patients in Chongqing, China using HFNC in patients with hypoxemic  
367 respiratory failure due to SARS-CoV-2 infection (48) showed a failure rate of HFNC of 41%  
368 (0% in those with PaO<sub>2</sub>/FiO<sub>2</sub> > 200 and 63% in those with PaO<sub>2</sub>/FiO<sub>2</sub> < 200), thus  
369 suggesting that HFNC may be an alternative respiratory support in mild cases.

370

371 Despite of potential advantages provide by HFNC, serious concerns about aerosolization  
372 and increased risk of infection for health care workers were raised because the possible  
373 aerosol spreading generated by high-flow therapy. In this regard, a systematic review  
374 including 7 studies assessing the risk of aerosolization, dispersion and infection (24) (six  
375 of which were conducted in healthy volunteers or were electronic simulations and one  
376 clinical study with crossover between conventional oxygen therapy and HFNC), found a  
377 substantial risk of error in study designs, limitations regarding to small sample sizes and  
378 lack of information about studies conducted in patients with SARS-CoV-2 infection or  
379 similar germs that could be extrapolated to the Covid-19. That systematic review  
380 suggested that increasing oxygen flow during HFNC therapy effectively increases the  
381 distance at which aerosol particles are dispersed, but such dispersion occurs at lower  
382 distances that those caused by application of nasal CPAP (49) or conventional oxygen  
383 therapy devices (50). In addition, wearing a surgical mask on the patient's face during  
384 HFNC application can effectively reduce the dispersion of aerosol particles [Leonard S.  
385 Chest 2020; DOI: <https://doi.org/10.1016/j.chest.2020.03.043>]. Similarly, in the case  
386 series reported, no cases of infection occurred in health care personnel (48, 51, 52).

387

388 In conclusion, HFNC is a reliable modality to support acute hypoxemic respiratory failure.  
389 Nevertheless, the effect of HFNC in patients with moderate and severe respiratory failure  
390 due to COVID-19 has not been elucidated. Interestingly, clinical practice during early  
391 Covid-19 pandemics reveals a quite similar number of patients under HFNC and NIMV  
392 (22). Although high-quality evidence on the use of HFNC in Covid-19 is still lacking, results  
393 from studies in hypoxemic failure signal that HFNC may reduce the need for intubation,

394 while the risk of aerosol spreading is probably not higher than that observed with other  
395 non-invasive devices. Nevertheless, patient should be carefully selected for its use and  
396 closely monitored to avoid delays in intubation.

397 **Table 1. Clinical studies on the use of High-Flow Oxygen therapy in acute hypoxemic respiratory failure**

| Study         | Number of randomized patients | Population                                                                                                                                                                                                                                                                           | Intervention                                                                                   | Controls                                                                                                                            | Outcomes                                                                          |
|---------------|-------------------------------|--------------------------------------------------------------------------------------------------------------------------------------------------------------------------------------------------------------------------------------------------------------------------------------|------------------------------------------------------------------------------------------------|-------------------------------------------------------------------------------------------------------------------------------------|-----------------------------------------------------------------------------------|
| Azoulay, 2018 | 778                           | Inclusion: ICU patients, PaO <sub>2</sub> < 60mmHg or SpO <sub>2</sub> <90% at FiO <sub>2</sub> 0.21 (ambient air), immunosuppression<br>Exclusion: increased CO <sub>2</sub>                                                                                                        | Initial parameters: Flow 50 L/min FiO <sub>2</sub> : 1.0<br>Duration: not specified.           | Conventional Nasal Cannula or face mask<br>Initial parameters: Flow: to reach SpO <sub>2</sub> ≥ 95%                                | Mortality (Primary);<br>Need for IMV, ICU-LOS, hospital-LOS, comfort and dyspnea. |
| Bell, 2015    | 100                           | Inclusion: Urgent patients, RR ≥ 25 breaths /min, SpO <sub>2</sub> ≤ 93%.<br>Exclusion: Patients requiring immediate NIMV or IMV                                                                                                                                                     | parameters: Flow rate: 50 L/min FiO <sub>2</sub> : 0.3<br>Duration: 2 hours.                   | Conventional Nasal Cannula or face mask<br>Initial parameters: O <sub>2</sub> in both groups was titrated during a period of 2hours | Need for IMV, comfort.                                                            |
| Frat, 2015    | 313                           | Inclusion: ICU patients, acute respiratory failure with RR > 25 breaths / min, PaO <sub>2</sub> /FiO <sub>2</sub> ≤ 300, at O <sub>2</sub> ≥ 10 L/min by ≥ 15 min.<br>Exclusion: asthma, chronic lung disease, increased CO <sub>2</sub> , Cardiovascular instability, need for IMV. | Initial parameters Flow rate: 50 L/min<br>FiO <sub>2</sub> : 1.0<br>Duration: not specified.   | Non-Rebreathing Mask<br>Initial parameters: Flow: ≥ 10 L/min                                                                        | Mortality (primary),<br>Need for IMV need, ICU-LOS, comfort.                      |
| Jones, 2016   | 322                           | Inclusion: Emergency patients, SpO <sub>2</sub> ≤ 92% to ambient air, RR ≥ 22 breaths/min.<br>Exclusion: urgent NIMV or IMV.                                                                                                                                                         | Initial parameters: Flow rate: 40 L/min<br>FiO <sub>2</sub> : 0.28<br>Duration: not specified. | Nasal mask or cannula<br>Initial parameters: N/A.                                                                                   | Mortality need for IMV, escalation (primary).<br>LOS hospitals.                   |
| Lemiale, 2015 | 102                           | Inclusion: ICU patients, immunocompromised, O <sub>2</sub> at > 6 L/min to maintain SpO <sub>2</sub> > 95% or respiratory distress<br>Exclusion: increased CO <sub>2</sub> , IMV requirement or urgent intubation.                                                                   | Initial parameters: Flow rate: 40-50 L/min<br>FiO <sub>2</sub> : 1.0<br>Duration: 2 hours.     | Venturi mask<br>Initial parameters: Flow rate: 15 L/min<br>FiO <sub>2</sub> : 0.6.                                                  | IMV requirement (primary).<br>Dyspnea, comfort.                                   |
| Makdee, 2017  | 136                           | Inclusion: Emergency patients, Pulmonary                                                                                                                                                                                                                                             | Initial parameters:                                                                            | Nasal cannula or                                                                                                                    | Mortality, need for IMV,                                                          |

|                                |    |                                                                                                                                                                                                      |                                                                                                  |                                                                                      |                                                   |
|--------------------------------|----|------------------------------------------------------------------------------------------------------------------------------------------------------------------------------------------------------|--------------------------------------------------------------------------------------------------|--------------------------------------------------------------------------------------|---------------------------------------------------|
|                                |    | edema, SpO <sub>2</sub> < 95% to ambient air, RR >24 breaths /min<br>Exclusion: Urgent NIV or IMV requirement, CV instability, RR >35 breaths /min, SpO <sub>2</sub> < 90%, End-stage renal disease. | Flow rate: 35 L/min<br>FiO <sub>2</sub> : N/A<br>Duration: 1 hour.                               | non-rebreathing mask<br>Initial parameters: N/A.                                     | escalation, LOS-hospital, dyspnea, comfort.       |
| Parke, 2011                    | 60 | Inclusion: ICU patients, O <sub>2</sub> ≥ 4 L/min per CN for > 4 h or ≥ 6 L/min per face mask > 2 h and/or RR ≥ 25 breaths /min and/or WOB<br>Exclusion: NIMV or IMV requirement urgent              | Initial parameters:<br>Flow rate: 35 L/min<br>FiO <sub>2</sub> : N/A<br>Duration: not specified. | Face mask<br>Initial parameters: N/A.                                                | Escalation in therapy                             |
| Rittayamai, 2015               | 40 | Inclusion: Emergency patients, RR > 24 resp/min, SpO <sub>2</sub> < 94% to ambient air<br>Exclusion: Need for IMV, Cardiovascular instability, chronic respiratory failure.                          | Initial parameters:<br>Flow rate: 35 L/min<br>FiO <sub>2</sub> : N/A<br>Duration: 1 hour.        | NC or non-rebreathing mask<br>Initial parameters: N/A                                | Need for IMV scaling, dyspnea (primary), comfort. |
| Schwabbaue r, 2014 (Crossover) | 14 | Inclusion: ICU patients, PaO <sub>2</sub> < 55mmHg on R/A<br>Exclusion: CPE, CV instability.                                                                                                         | Initial Settings:<br>Flow rate: 55 L/min<br>Duration: 30 min<br>FiO <sub>2</sub> : 0.6           | Venturi Mask<br>Initial parameters:<br>Flow rate: 15 L/min<br>FiO <sub>2</sub> : 0.6 | Dyspnea and Comfort.                              |

398 **4. JUSTIFICATION**

399 Until the preparation of this protocol, there were no high quality studies testing specific  
400 medications or interventions modifying the time course or clinical outcomes in severe  
401 forms of SARS-CoV-2 infection. Nevertheless, it should be expected that advanced life  
402 support measures and a high quality critical care should contribute to greater survival  
403 probabilities and functional recovery in more severe cases.

404 Arterial hypoxemia is the leading feature of severe cases of Covid-19. In general,  
405 management of hypoxemic respiratory failure relies on oxygen supplementation aiming to  
406 improve oxygenation and to support respiratory effort. At the beginning of the SARS-CoV-  
407 2 pandemic, many patients were immediately intubated and placed on mechanical  
408 ventilation perhaps due to the perception of severity in terms of hypoxemia, and also  
409 because the concerns about the safety of non-invasive respiratory support systems for  
410 health care professionals. Remarkably, some authors related the need of mechanical  
411 ventilation with high mortality rates in general populations with acute hypoxemic  
412 respiratory failure. Nevertheless, this contrasts with the view stating that spontaneously  
413 breathing non-intubated patients may auto-injure lungs when breathing large tidal  
414 volumes because high respiratory drive and potentially injurious transpulmonary  
415 pressure swings.

416 High-flow oxygen therapy through a nasal cannula is a technique whereby a mixture of  
417 heated and humidified oxygen and air are delivered to the nose at high flow rates. Data  
418 suggest that high flow oxygen through a nasal cannula might decrease the need for  
419 tracheal intubation and might reduce the risk of escalation of oxygen therapy in patients  
420 with acute respiratory hypoxemic failure, with no apparent impact on mortality rates.  
421 There is not clear if such data are applicable to Covid-19. Nonetheless, some international  
422 guidelines proposed the use high-flow nasal cannula to initially treat patients with Covid-  
423 19-related acute respiratory hypoxemic failure and observational studies published after  
424 the starting of the current trial suggested this respiratory modality as feasible and at least,  
425 as safe as standard oxygen therapy. As evidence supporting the use of this respiratory  
426 support modality is limited, we conducted a trial to assess the impact of high-flow oxygen  
427 therapy through a nasal cannula vs. conventional oxygen therapy on the need for  
428 intubation and the time to clinical recovery in patients with severe Covid-19.

429

430

431

432 **5. RESEARCH QUESTION**

433 Does the use of a high-flow oxygen therapy through a nasal cannula, compared with  
434 conventional oxygen therapy, reduce requirement of intubation and time to clinical  
435 improvement among patients with severe Covid-19?

436

437

438

439

440

441

442

443

444

445

446

447

448

449

450 **6. OBJECTIVES**

451

452 6.1. Primary objective

453 To evaluate the impact of the use of high-flow oxygen through a nasal cannula vs.  
454 conventional oxygen therapy on the need for intubation/support with invasive mechanical  
455 ventilation and clinical status as assessed by a 7-category ordinal scale in patients with  
456 moderate/severe hypoxemic respiratory failure secondary to SARS-CoV-2 infection.

457

458 6.2. Specific objectives

459

460 For secondary Outcomes

461

462 Efficiency

- 463
- 464 • To evaluate the impact of high-flow oxygen therapy through a nasal cannula  
465 (HFNC) vs. conventional oxygen therapy (COT) on the requirement of early  
466 intubation and invasive mechanical ventilation support.
  - 467 • To assess the impact of HFNC vs. COT on mechanical ventilation-free days.
  - 468 • Assess the impact of HFNC vs. COT on renal replacement therapy-free days.
  - 469 • To assess differences in length of hospital/ICU stay between study groups.
  - 470 • To assess differences in all-cause mortality at days 14 and 28 post-randomization,  
471 between study groups

471

472 Safety

- 473
- 474 • To assess the occurrence / proportion of patients with severe adverse events  
475 within 28 days from randomization.
  - 476 • To assess the occurrence / proportion of bacterial / fungal infections within 28  
477 days from randomization.

477

478 For Tertiary Outcomes

- 479 • To evaluate the differences in the evolvement of oxygen flow requirement and  
480 PaO<sub>2</sub>/FiO<sub>2</sub> ratio between groups
- 481 • To evaluate the differences for the time elapsed from randomization to intubation  
482 / invasive mechanical ventilation support in patients failing to high-flow oxygen  
483 therapy and conventional oxygen therapy
- 484 • To evaluate the impact of HFNC vs. COT on the clinical condition at day 28
- 485 • To evaluate the impact of HFNC vs. COT on the development and evolution of  
486 multiorgan dysfunction as assessed by the SOFA score.
- 487 • To evaluate the impact of HFNC vs. COT on the development and evolution of  
488 extra-pulmonary organ dysfunction as assessed by extra-pulmonary SOFA score
- 489 • To evaluate the differences in HACOR and ROX scores at 2 and 4 hours post-  
490 randomization between the groups and their relationship with requiring  
491 intubation and mechanical ventilation-free days
- 492 • To assess differences in IL-6 and IL-8 kinetics within 7 days from randomization,  
493 between study groups
- 494 • To assess differences in ferritin kinetics, LDH, leukocyte count,  
495 neutrophil/lymphocyte count relationship, platelet count and D-dimer during the  
496 7 days following randomization, between study groups
- 497

498 For Predefined Subgroups

- 499 • To assess the impact of high-flow oxygen vs. conventional oxygen therapy on the  
500 need for intubation / invasive ventilation support and the time to clinical recovery  
501 (as assessed by a 7-category ordinal scale) in patients with initial PaO<sub>2</sub>/FiO<sub>2</sub> ratio >  
502 and < 100 mmHg.
- 503 • To assess the impact of high-flow oxygen vs. conventional oxygen therapy on the  
504 need for intubation / invasive ventilation support and the time to clinical recovery  
505 (as assessed by a 7-category ordinal scale) in patients with baseline IL-6 levels >  
506 and < 100 pg/mL.

- 507
- 508
- 509
- To assess the impact of high-flow oxygen vs. conventional oxygen therapy on the need for intubation / invasive ventilation support and the time to clinical recovery (as assessed by a 7-category ordinal scale) in patients aged > and < 60 years.

510

511

512

513

514

515

516

517

518

519

520

521

522

523

524

525

526

527



528 **7. HYPOTHESIS**

529

530 7.1. Primary hypothesis

- 531 • The use of high-flow nasal cannula support will lead to lower intubation rates and  
532 lesser requirement for invasive mechanical ventilation within 28 days of  
533 randomization
- 534 • The use of high-flow nasal cannula support will decrease the time to clinical  
535 recovery as assessed by a 7-point ordinal scale.

536

537 7.2. Secondary /terciary hypotheses

- 538 • The use of high-flow oxygen through a nasal cannula will decrease early  
539 requirement of tracheal intubation
- 540 • The use of high-flow oxygen through a nasal cannula will increase the number of  
541 mechanical ventilation-free days.
- 542 • Patients undergoing support with HFNC will have more renal replacement  
543 therapy-free days than those undergoing COT.
- 544 • Patients subjected to HFNC support will show shorter hospital/ICU lengths of stay
- 545 • The use of high-flow oxygen through a nasal cannula will lead to better clinical  
546 condition at day-28
- 547 • Patients subjected to HFNC support will show no difference in all-cause mortality  
548 at days 7, 14 and 28 post-randomization compared to those subjected to  
549 conventional oxygen therapy.
- 550 • Proportion of serious adverse effects will be similar between groups
- 551 • Time elapsed from randomization to intubation / invasive mechanical ventilation  
552 support will be no different between groups
- 553 • The use of high-flow oxygen through a nasal cannula will show less severe  
554 multiorgan dysfunction
- 555 • High-flow oxygen therapy will be related with lesser extra-pulmonary organ  
556 dysfunction

- 557       • HACOR and ROX scores will allow to early identify patients failing to high-flow  
558       oxygen therapy
- 559       • Patients successfully supported by HFNC will show similar kinetics of IL-6 and IL-  
560       8, during the 7 days following randomization
- 561       • Patients successfully supported by HFNC will show similar kinetics of ferritin, LDH,  
562       leukocyte count, neutrophil/lymphocyte count ratio, platelet count, and D-dimer  
563       during the 7 days after randomization
- 564       • Benefit of high flow nasal cannula support on requirement for intubation /  
565       invasive mechanical ventilation and time to clinical recovery will be greater in  
566       patients with initial PaO<sub>2</sub>/FiO<sub>2</sub> > 100 mmHg.
- 567       • Benefit of high flow nasal cannula support on requirement for intubation /  
568       invasive mechanical ventilation and time to clinical recovery will be greater in  
569       patients with initial IL-6 levels < 100 pg/mL.
- 570       • Benefit of high flow nasal cannula support on requirement for intubation /  
571       invasive mechanical ventilation and time to clinical recovery will be greater in  
572       patients < 60 years.

573

574

575

576

577

578

579

580

581

582

583

584

585 **8. OUTCOMES**

586 8.1. Primary outcomes

587

- 588 • Need for intubation / invasive mechanical ventilation support (time frame: 28  
589 days).
- 590 • Clinical recovery as assessed by a 7-category ordinal scale (time frame: 28 days).

591

592 8.2. Secondary and tertiary outcomes / subgroup analysis

593

594 Secondary Outcomes

595 Efficiency

- 596 • Early requirement of intubation / invasive mechanical ventilation support (time  
597 frame: 7 days – 14 days).
- 598 • Mechanical ventilation-free days (time frame: 28 days).
- 599 • Renal replacement therapy-free days (time frame: 28 days)
- 600 • Length of ICU stay (time frame: 28 days)
- 601 • Length of hospital stay (time frame: 28 days)
- 602 • Hospital mortality – all causes (time frame: 14 and 28 days)

603 Safety

- 604 • Occurrence / proportion of patients with serious adverse events (time frame: 28  
605 days)
- 606 • Occurrence / proportion of bacterial - fungal infections (time frame: 28 days).

607

608

609 Tertiary Outcomes

- 610 • Evolvement of oxygen flow requirement and PaO<sub>2</sub>/FiO<sub>2</sub> ratio (time frame: 7 days)
- 611 • Time elapsed from randomization to intubation / invasive mechanical ventilation
- 612 support in patients failing to high-flow oxygen therapy and conventional oxygen
- 613 therapy (time frame: 28 days).
- 614 • Clinical condition at day 28 (time frame: 28 days)
- 615 • Evolvement of multiorgan dysfunction as assessed by SOFA score (time frame: 14
- 616 days)
- 617 • Evolvement of extra-pulmonary organ dysfunction as assessed by extra-
- 618 pulmonary SOFA score (time frame: 14 days).
- 619 • HACOR and ROX scores at 2- and 4-hours post-randomization and their relation
- 620 with requirement of intubation (time frame: 28 days)
- 621 • Differences in time-course of IL-6 and IL-8 between study groups (time frame: 7
- 622 days)
- 623 • Differences in time-course of ferritin, LDH, leukocyte count, neutrophil to
- 624 lymphocyte count relationship, platelet count, and D-dimer among the groups
- 625 under study (time frame: 7 days)

626

627 Subgroup Analysis

- 628 • Time to intubation / invasive mechanical ventilation and clinical recovery in
- 629 subgroups with baseline PaO<sub>2</sub>/FiO<sub>2</sub> > and < 100 mmHg (time frame: 28 days)
- 630 • Time to intubation / invasive mechanical ventilation and clinical recovery in
- 631 subgroups with baseline IL-6 > and < 100 pg/mL (time frame: 28 days)
- 632 Time to intubation / invasive mechanical ventilation and clinical recovery in
- 633 subgroups aged > and < 60 years (time frame: 28 days)

634

635

636

637

638

639

640

## 641 **9. METHODS**

642

### 643 9.1. Design

644 Phase IIb, multicenter, randomized, open-label, controlled study of the use of high- flow  
645 oxygen therapy through a nasal cannula vs. conventional oxygen therapy in patients with  
646 severe Covid-19.

647

### 648 9.2. Study population

649 Adult patients (>18 years) admitted to the emergency room or Intensive Care Unit with  
650 acute hypoxemic respiratory failure due to Covid-19

651

### 652 9.3. Groups under study

- 653 • High-Flow oxygen therapy through a Nasal Cannula (HFNC).
- 654 • Conventional oxygen therapy (COT).

655 All patients will receive standard care (hemodynamic / respiratory / metabolic /  
656 hematological / general).

657

### 658 9.4. Inclusion criteria

- 659 • Adults > 18 years old.
- 660 • Emergency or ICU admission under suspected / confirmed SARS-CoV-2 infection.
- 661 • Acute respiratory distress with:
  - 662 -  $PaO_2/FiO_2 < 200$ .

- 663           - Use of accessory muscles.
- 664           - Breathing rate > 25 per minute.
- 665           • Having a progression < 6 hours since fulfilling definition of moderate or severe
- 666           acute respiratory failure due to suspected or confirmed SARS-CoV-2 infection.
- 667
- 668

669           9.5. Exclusion Criteria

- 670           • < 18 years.
- 671           • Indication for immediate tracheal intubation.
- 672           • Pregnant woman / positive pregnancy test at the time of potential inclusion.
- 673           • Chronic liver disease / liver cirrhosis Child-Pugh C.
- 674           • Confirmation of active bacterial or fungal infection.
- 675           • Uncontrolled HIV/AIDS disease (defined by presence of viral load > 200
- 676           copies/mL).
- 677           • Previous history of COPD Gold C – D.
- 678           • History of COPD requiring hospitalization or ICU admission during the last year.
- 679           • History of congestive heart failure NYHA III – IV.
- 680           • History or actual left ventricular ejection fraction < 45%
- 681           • Highly suspected or confirmed cardiogenic pulmonary edema.
- 682           • Hypercapnic respiratory failure (PaCO<sub>2</sub> > 55 mmHg).
- 683           • History or high suspicion of central or peripheral demyelinating disorders at the
- 684           time of potential inclusion.
- 685           • Imminence of death within the next 24 hours (according to investigator's clinical
- 686           judgment)
- 687           • Any serious medical condition or clinical laboratory test abnormality that, at the
- 688           investigator's judgment, prevents safe patient participation and completion of the
- 689           study.
- 690           • Participation in another clinical trial (except other related to SARS-CoV-2. These
- 691           criteria will be always discussed among steering committee members

692

693 9.6. Sample size

694 Sample size was calculated under the assumption of an intubation rate of 60%, according  
695 to the data obtained from 75 patients with Covid-19-related moderate and severe  
696 hypoxemic respiratory failure treated in the coordinating center between March and June  
697 2020. Such proportion of intubation events was in agreement with previous data from a  
698 randomized controlled trial testing high-flow oxygen through nasal cannula in mixed  
699 populations of patients with acute hypoxemic respiratory failure.

700 Estimating an intubation rate around 60% in conventionally-treated patients, we  
701 calculated that enrollment of 196 patients would be necessary to demonstrate an absolute  
702 reduction of 20% in the proportion of intubation and requirement of invasive mechanical  
703 ventilation with an 80% power and two-side alpha level of 0.05. In addition, it was  
704 estimated that 160 patients (80 by arm) would be necessary to demonstrate a difference  
705 in time to recovery from 14 ( $\pm$  4.5) to 12 ( $\pm$  4.0) days for the conventional oxygen and  
706 high-flow oxygen therapy groups respectively, with an 80% power and two-side alpha  
707 level of 0.05. Consequently, the sample size of 196 patients was retained as the sample size  
708 target.

709 Nevertheless, due to the particular situation during pandemic, an important number of  
710 participants (n=18, representing the 9.2% of the total sample size) were transferred to  
711 other hospitals within 72 hours from randomization at the time in which the HiFlo-Covid  
712 protocol amendment 2.0 was constructed. After an extensive discussion with the Ethical  
713 Committee and trying to favor the possibility that results of this trial keep sufficient power  
714 and consequently, more reliable results, the number total of randomized patients is newly  
715 adjusted up to complete a total of 220 participants.

716

717 9.7. Recruitment strategy

718

719 9.7.1. Screening

720 All adult patients >18 years old admitted to the emergency department, or Intensive Care  
721 Unit with suspected SARS-CoV-2 infection will be considered as potential candidates for

722 the study. Due to the nature of the disease, it is expected that potential patients to be  
723 placed on a conventional oxygen system previous to inclusion. Research teams at each  
724 center will follow up patients fulfilling initial criteria for suspected or confirmed SARS-  
725 CoV-2 and acute respiratory failure. Arterial blood gas analysis will be essential for making  
726 decisions on admission to the study. Those patients fulfilling all inclusion criteria and  
727 discarding all exclusion will be selected for the study (See Annex 1: Inclusion / Exclusion  
728 Forms) will be requested for informed consent and potential inclusion. Each center will be  
729 responsible for completing information about all suspected and confirmed cases of acute  
730 respiratory failure due to SARS-CoV-2 being selected or not for the study, recording  
731 reasons for non-inclusion for these last (See Annex 2: Summary Screening).

732

### 733 9.7.2. Randomization

734 Randomization will be centrally performed by using an electronic case-report form system  
735 (RedCap®) and stratified by study site in permuted block of 4 and 6, to ensure allocation  
736 concealment. An independent statistician from the Clinical Research Center (Centro de  
737 Investigaciones Clínicas, Fundación Valle del Lili, Cali - Colombia) will monitor this  
738 process. He/she will use a public access package: Random Allocation Software  
739 (<http://www.msaghaei.com/Softwares/dnld/RA.zip>) for this purpose. Randomization  
740 sequence will rest in the REDCap® system and will be revealed once the screening process  
741 and informed consent from each patient is completed.

742

### 743 9.7.3. Masking and concealment

744 Assignment to the therapeutic group will be disclosed only after confirmation of patient  
745 inclusion and informed consent has been obtained. Due to the characteristics of the  
746 interventions, masking will not be possible. Information from each patient will be  
747 recorded in an electronic format. Therapeutic modality will not be expressly identified, so  
748 that independent statistician will not know the allocated therapy that each patient was  
749 assigned.

750



751 9.8. Statistical analysis plan

752 All the analysis will be performed on an intention-to-treat basis with no exclusion after  
753 randomization except exclusions for withdrawn consent, according to the local  
754 regulations. In addition, the following predefined subgroups will be analyzed:

- 755
- Age group: <60 years and ≥60 years.
  - IL-6 at randomization: <100 and ≥100 pg/mL.
  - PaO<sub>2</sub>/FiO<sub>2</sub> initial <100 and ≥100.
- 756
- 757

758 Data distribution will be evaluated by the Shapiro-Wilk test. Then, comparisons between  
759 groups will be performed according to type of variable (continuous / discrete) and  
760 whether or not assumptions of normality are met. The t of student or Wilcoxon Mann  
761 Whitney will be used for continuous variables (according to the type of distribution),  
762 while X<sup>2</sup> or Fisher's exact test will be used for discrete ones.

763 No participants will be excluded from analysis because of missing or incomplete data.

764

765 9.8.1. Analysis Plan for Primary Outcomes

766 Proportion of patients requiring intubation within 28 days of inclusion will be compared  
767 using the X<sup>2</sup> test. The effect of treatment on the primary outcome (requirement for  
768 intubation / invasive mechanical ventilation) will be calculated with a proportional Cox  
769 model of risk adjusted according to 3 pre-specified variables: age (≥ or < 60 years old),  
770 baseline PaO<sub>2</sub>/FiO<sub>2</sub> and comorbidities (a composite of arterial hypertension, diabetes,  
771 obesity [body mass index > 30], chronic obstructive pulmonary disease, end-stage renal  
772 failure, heart failure, cirrhosis Child-Pugh A-B). The results will be reported as hazard  
773 ratios with 95% confidence intervals and represented in Kaplan-Meier curves. Same  
774 analysis will be performed separately according to initial 7-point category ordinal scale.

775 Time to clinical improvement will be defined as time elapsed from randomization until the  
776 first day, during the 28 days after enrollment, on which a patient attained a reduction in  
777 two or more points in the modified ordinal 7-category scale. Primary efficacy analysis of  
778 this objective will be evaluated during the first 28 days after randomization, taking into

779 account failure to improve clinically (< 2 points on the scale) or death as "censures". Time  
780 to clinical improvement will be represented by a Kaplan-Meier curve and compared with a  
781 log-rank test. Hazard ratios and 95% confidence intervals will be calculated using a  
782 proportional model of Cox risk adjusted according to 3 pre-specified variables: age (> or <  
783 60 years old), baseline PaO<sub>2</sub>/FiO<sub>2</sub> and comorbidities (diabetes, hypertension, obesity BMI  
784 ≥ 30). Same analysis will be performed separately according to initial 7-point category  
785 ordinal scale.

786

### 787 9.8.1. Analysis Plan for Secondary Outcomes

788 Evaluation of secondary outcomes will be performed by comparing proportions by the X<sup>2</sup>  
789 test or the Fisher Exact test, as appropriate. Continuous variables will be compared with  
790 the T-test or the Wilcoxon-Mann-Whitney test according to distribution depicted by the  
791 variables. Categorical variables will be compared with the Wilcoxon-Mann-Whitney test.  
792 Time to outcome variables will be analyzed as previously described. A p<0.05 will be  
793 considered as significant.

794 A complete description for secondary and tertiary outcomes along with subgroup analysis  
795 can be consulted in the Statistical Analysis Plan Supplement V2.0.

796

### 797 9.8.2. Interim analysis plan

798 A single interim analysis is planned when the 28-day follow-up had been completed for  
799 the first 100 randomized patients. Database will be prepared and sent to the Members of  
800 the Safety Monitoring Board (MSMB). An independent statistician will perform the  
801 analysis and will discuss it with the MSMB, who later will communicate the results to the  
802 Steering Committee. The Haybittle-Peto stopping boundaries will be used, with a P-value  
803 threshold of less than 0.001 to interrupt the trial for safety and a P-value thresh- old of  
804 less than 0.0001 to interrupt the trial for efficacy. The data will be analyzed in a blind  
805 manner but data about group allocation would be revealed in the event that security  
806 issues or unexpected events are detected. Safety monitoring board will recommend to  
807 continue or to stop with the enrollment accordingly.

808

## 809 **10. GENERAL MANAGEMENT PROTOCOL**

### 810 10.1. Initial approach

811 All adult patients >18 years old admitted to the emergency department or Intensive Care  
812 Unit under suspicion of SARS-CoV-2 infection will be considered as potential candidates  
813 for study (see 10.3: Operational case definitions). The attending physician will guide initial  
814 management according to SpO<sub>2</sub>, respiratory rate, and the presence / absence of  
815 respiratory distress. Thus, three possible initial scenarios are proposed:

816 • Scenario 1: patient with SARS-CoV-2 disease compatible symptoms, but without  
817 hypoxemia (SpO<sub>2</sub> >95% at FiO<sub>2</sub> 0.21).

818 - Action: not a candidate for study. Management according to individual  
819 institutional protocol.

820

821 • Scenario 2: patient with SARS-CoV-2 disease compatible symptoms, and initial  
822 hypoxemia (SpO<sub>2</sub> < 90% at FiO<sub>2</sub> 0.21) and/or respiratory rate 25 - 40 /min, with  
823 no signs of immediate indication for intubation.

824 - Action: potential candidate for admission. Start oxygen supply by using a  
825 low flow system (conventional nasal cannula, venturi system, mask with  
826 reservoir), arterial blood sampling for gas analysis, monitoring and general  
827 management according to local protocol (monitoring, venous access,  
828 paraclinical testing, etc.).

829

830 • Scenario 3: patient with SARS-CoV-2 disease compatible symptoms, WITH signs of  
831 immediate indication for intubation.

832 - Action: Immediate intubation. Not candidate for study. General  
833 management according to local protocol

834

835 Patients in "scenario 1" will be follow-up ONLY if requiring hospitalization and might  
836 become candidates for study admission if the event that their clinical condition vary to  
837 "scenario 2" at any time.

838 Patients in "scenario 2" will be considered potential study candidates. Arterial blood gas  
839 analysis will be performed once a conventional oxygen system has been installed  
840 according to decision of the attending physician. Patients with clinical symptoms and signs  
841 compatible with SARS-CoV-2 infection and having a  $PaO_2/FiO_2 < 200$  ratio will be  
842 classified as moderate or severe hypoxemia ( $100 < PaO_2/FiO_2 < 200$  or  $PaO_2/FiO_2 < 100$ ,  
843 respectively) and might be randomly allocated to receive either high-flow oxygen therapy  
844 through a nasal cannula (HFNC) or conventional oxygen therapy (COT) once all inclusion  
845 criteria are met and all exclusion criteria are discarded. "Suspect status" will change to  
846 "confirmed case" once a positive genomic test for SARS-CoV-2 is obtained from a sample  
847 from upper or lower airway.

848 Patients in "scenario 3" will undergo immediate tracheal intubation and will NOT be  
849 included in the study at any time but they will be recorded on the study screening form.

850

## 851 10.2. Criteria for IMMEDIATE INTUBATION (NOT Randomized patients)

852 These pre-determined criteria will be applied for patients with acute respiratory failure  
853 and need for immediate intubation (i.e., not candidate patients to study because need for  
854 immediate intubation before any attempt of randomization). These criteria are a guide  
855 aimed to avoid delayed intubation, and include:

- 856 - Signs of respiratory failure despite initial oxygen supplementation.
- 857 - Signs of respiratory muscle fatigue suggesting imminent cardio-respiratory  
858 arrest.
- 859 - Breathing rate  $> 40$  / minute or  $< 8$  / minute.
- 860 - Abundant bronchial secretions/mismanagement of secretions/mechanical  
861 airway obstruction.
- 862 - Acidosis -  $pH < 7.20$ .
- 863 -  $SpO_2 < 90\%$  for more than 5 minutes (ruling out signal problems in its  
864 measurement) having maximized conventional oxygen supply (mask with  
865 reservoir /  $FiO_2 0.80$ ).
- 866 - Hemodynamic signs.

- 867 - PAS < 90 mmHg or MAP < 60 mmHg persistent, with vasopressor support  
868 requirement (Noradrenaline > 0.10 µgr/kg/min) despite initial volume input  
869 (at least 8 cc/kg).  
870 - Deterioration of consciousness (Glasgow Coma Scale ≤ 12 points).

871

872

### 873 10.3. Internal operational case definitions

874

#### 875 10.3.1. Suspected Moderate Case

876 A patient will be considered in this category when meet ALL the following parameters:

- 877 - **Signs and symptoms consistent with SARS-CoV-2 infection not explained by**  
878 **any other previously known or current clinical condition** (bacterial or viral  
879 infectious; autoimmune; neoplastic): fever, cough, odynophagia/anosmia and  
880 dyspnea.  
881 - Radiological signs compatible with pneumonia consisting of interstitial / alveolar  
882 infiltrates in the chest X-ray and/or frosted glass infiltrates in chest CT scan  
883 (suggestive of viral infection).  
884 - Initial hypoxemia (SpO<sub>2</sub> < 90% at FiO<sub>2</sub> 0.21) and/or respiratory rate > 25/min,  
885 requiring oxygen supplementation at 0.28 < FiO<sub>2</sub> < 0.60 to achieve SpO<sub>2</sub> > 92% (at  
886 least 5 minutes after SpO<sub>2</sub> signal stabilization).  
887 - Confirmed **100 < PaO<sub>2</sub>/FiO<sub>2</sub> < 200** (according to arterial gas analysis), **WITHOUT**  
888 **evidence of extra-pulmonary organ dysfunction** (extra-pulmonary SOFA score  
889 > 2 points).

890

#### 891 10.3.2. Suspected Severe Case

892 A patient will be considered in this category when meet ALL the following parameters:

- 893 - **Signs and symptoms consistent with SARS-CoV-2 infection not explained by**  
894 **any other previously known or current clinical condition** (bacterial or viral  
895 infectious; autoimmune; neoplastic): fever, cough, odynophagia/anosmia and  
896 dyspnea.
- 897 - Radiological signs compatible with pneumonia consisting of interstitial / alveolar  
898 infiltrates in the chest X-ray and/or frosted glass infiltrates in chest CT scan  
899 (suggestive of viral infection).
- 900 - Initial hypoxemia ( $SpO_2 < 90\%$  at  $FiO_2 0.21$ ) and/or respiratory rate  $> 25/min$ ,  
901 requiring oxygen supplementation at  $0.28 < FiO_2 < 0.60$  to achieve  $SpO_2 > 92\%$  (at  
902 least 5 minutes after  $SpO_2$  signal stabilization).
- 903 - Confirmed  $PaO_2/FiO_2 < 100$  (according to arterial gas analysis), **AND / OR**  
904 **evidence of extra-pulmonary organ dysfunction** (extra-pulmonary SOFA score  
905  $> 2$  points).

906

907 10.2.3. Confirmed Moderate Case

908 A patient will be considered in this category when meet ALL the following parameters:

- 909 - **Confirmed SARS-CoV-2 infection by genomic detection** from an upper or lower  
910 airway sample in presence of compatible symptoms: fever, cough, odynophagia /  
911 anosmia and dyspnea.
- 912 - Radiological signs compatible with pneumonia consisting of interstitial / alveolar  
913 infiltrates in the chest X-ray and/or frosted glass infiltrates in chest CT scan  
914 (suggestive of viral infection).
- 915 - Initial hypoxemia ( $SpO_2 < 90\%$  at  $FiO_2 0.21$ ) and/or respiratory rate  $> 25/min$ ,  
916 requiring oxygen supplementation at  $0.28 < FiO_2 < 0.60$  to achieve  $SpO_2 > 92\%$  (at  
917 least 5 minutes after  $SpO_2$  signal stabilization).
- 918 - Confirmed  $100 < PaO_2/FiO_2 < 200$  (according to arterial gas analysis), **WITHOUT**  
919 **evidence of extra-pulmonary organ dysfunction** (extra-pulmonary SOFA score  
920  $> 2$  points).

921

922 10.3.4. Confirmed Severe Case

923 A patient will be considered in this category when they meet ALL of the following  
924 parameters:

- 925 - **Confirmed SARS-CoV-2 infection by genomic detection** from an upper or lower  
926 airway sample in presence of compatible symptoms: fever, cough, odynophagia /  
927 anosmia and dyspnea.
- 928 - Radiological signs compatible with pneumonia consisting of interstitial / alveolar  
929 infiltrates in the chest X-ray and/or frosted glass infiltrates in chest CT scan  
930 (suggestive of viral infection).
- 931 - Initial hypoxemia ( $SpO_2 < 90\%$  at  $FiO_2 0.21$ ) and/or respiratory rate  $> 25/min$ ,  
932 requiring oxygen supplementation at  $0.28 < FiO_2 < 0.60$  to achieve  $SpO_2 > 92\%$  (at  
933 least 5 minutes after  $SpO_2$  signal stabilization).
- 934 - **Confirmation of  $PaO_2/FiO_2 < 100$**  (according to arterial gas analysis), **AND / OR**  
935 **evidence of extra-pulmonary organ dysfunction** (extra-pulmonary SOFA score  
936  $> 2$  points).

937

938 10.4. General protocol for respiratory support

939

940 10.4.1. High-flow nasal cannula (HFNC)

941 Starting parameters: flow between 60 liters – 80 / minute (according to available device).  
942  $FiO_2$  0.6 to 1.0 aiming  $SpO_2 \geq 92\%$ . Adequate wetting of system should be ensured  
943 according to recommendations from each HFNC device manufacturer.  $FiO_2$  may be  
944 decreased gradually according to individual condition, trying to maintain  $SpO_2 \geq 92\%$ .  
945 Flow gas will be adjusted according to the following parameters:

| $FiO_2$ %             | .21- .30 | .30 - .40 | .40 - .60 | .60 – 1.0 |
|-----------------------|----------|-----------|-----------|-----------|
| Flow rate<br>L/minute | 30       | 30-40     | 40 -50    | 50-70     |

946

947 10.4.2. Conventional oxygen therapy (OCT)

948 Oxygen by conventional nasal cannula / prongs, venturi mask, or mask with reservoir, at  
949 flows between 3 and 15 liters / minute, to attain  $SpO_2 \geq 92\%$ . The  $FiO_2$  may be decreased  
950 gradually according to individual conditions, trying to maintain  $SpO_2 \geq 92\%$ .

951

952 10.5. Monitoring of respiratory support therapy (HFNC vs. COT)

953 Once the participants have been randomly assigned to their respective respiratory  
954 support therapy, clinical and paraclinical evaluations will be performed at 2- and 4-hours  
955 from starting the respective respiratory support modality. Such evaluation will include  
956 arterial gas analysis and clinical condition. Signs of failure to the allocated respiratory  
957 support therapy will be looked for at these points and daily up to hospital discharge. If  
958 failure to respiratory support therapy is declared, tracheal intubation and invasive  
959 mechanical ventilation support will be performed.

960

961 10.6. Failure to respiratory support therapy (HFNC or COT)

962

963 Failure to respiratory support (high-flow or conventional oxygen therapy) was considered  
964 if at least one of the following was present:

- 965 -  $PaO_2 < 55$  mmHg
- 966 - Fail to improve signs of respiratory distress
- 967 - Development of copious bronchial secretions
- 968 -  $SpO_2 < 92\%$  for more then five minutes (discarding signal problems or other  
969 technical issues) while receiving the maximal support according to the group  
970 allocation
- 971 - Acidosis (metabolic / respiratory):  $pH < 7.25$
- 972 - Development of shock state (any type)
- 973 -  $PaCO_2 > 55$  mmHg (accompanied by acidosis)
- 974 - Neurological deterioration

975



976

977 10.6.1. Intubation Criteria (for Patients included in the study)

978

979 Predefined intubation criteria were followed in order to avoid delayed invasive  
980 mechanical ventilation support. Such intubation criteria were applied under the  
981 assumption that patient was under the maximum possible respiratory support provided  
982 by the therapy assigned (high-flow oxygen or conventional oxygen therapy). Such criteria  
983 were as follows:

984

985

- Signs of persistent respiratory distress

986

- Respiratory rate > 40 / min

987

- No improvement of laborious breathing - use of accessory muscles

988

- Development of copious bronchial secretions / impossibility to manage  
989 bronchial secretions

990

- Acidosis (metabolic / respiratory): pH < 7.25

991

- PaO<sub>2</sub> < 55 mmHg

992

- PaCO<sub>2</sub> > 55 mmHg (accompanied by acidosis)

993

- SpO<sub>2</sub> < 92% for more then five minutes (discarding signal problems or other  
994 technical issues)

995

996

997

- Signs of hemodynamic derangement

998

- Persistent systolic arterial pressure < 90 or mean arterial pressure < 60 mmHg,  
999 with vasopressor support requirement (norepinephrine > 0.10 µgr.kg.min<sup>-1</sup>) in  
1000 presence of an adequate intravascular volume

1001

- Clinical signs of severe tissue hypoperfusion: capillary refill time > 10 seconds;  
1002 Mottling score ≥ 4

1003

- Arterial lactate ≥ 4.0 mmol/L in presence of any clinical sign of tissue  
1004 hypoperfusion (capillary refill time > 3 seconds; Mottling score ≥ 2)

1005

1006

1007

- Signs of neurological derangement

1008

- Neurological impairment (Glasgow coma scale ≤ 12)

1009

1010 10.7. Additional management

1011

1012 10.7.1. Hemodynamic

1013 Each center will adjust general management according to their local guidelines. However,  
1014 we strongly recommend:

- 1015 - A resuscitation strategy with low fluid intake. For this, we recommend  
1016 IMMEDIATE initiation of vasopressor in patients with a diastolic blood pressure <  
1017 40 mmHg or a heart rate/diastolic blood pressure ratio > 2.30 (diastolic shock  
1018 index – DSI > 2.30) (53).
- 1019 - Administration of fluid resuscitation boluses according to dynamic predictors of  
1020 fluid responsiveness. Because some patients will be ventilated with tidal volumes  
1021 < 8 ml/kg and/or FR > 25 / minute, we recommend the use of tests in which  
1022 cardiac output variation is directly estimated (e.g.: VTI variation x  
1023 echocardiography in response to passive leg raising; cardiac index variation by  
1024 pulse contour analysis in response to end-expiratory occlusion maneuver for 20  
1025 seconds).
- 1026 - A combined strategy of clinical signs resuscitation-guided / arterial lactate-guided  
1027 resuscitation (54).
- 1028 - Use of norepinephrine as first vasopressor.
- 1029 - Use of vasopressin/epinephrine according to each institution's protocol.
- 1030 - Use of low-dose steroids in case of persistent hypotension/vasopressor  
1031 requirement after adequate volumetric resuscitation.
- 1032 - Use of albumin/crystalloids according to local protocol.
- 1033 - NO use of gelatin / dextrose as resuscitation fluids

1034

1035 10.7.2. Renal

1036 Each center will adjust local protocols for the use of renal replacement therapy. However,  
1037 we strongly recommend:

1038 - Provide renal replacement therapy according to conventional parameters of pH,  
1039 electrolytes, BUN / creatinine

1040 - Maintain neutral/negative fluid balance according to individual clinical condition.

1041

1042

1043 10.7.3. Hematological

1044 Each center will adjust management according to their local guidelines. However, we  
1045 strongly recommend:

1046 - NOT using systematic anticoagulation in patients with SARS-CoV-2 infection,  
1047 unless there is a clear indication to do so.

1048 - Note that elevated D-dimer does NOT represent a sufficient reason for formal  
1049 anticoagulation.

1050

1051 10.7.4. Steroid use

1052 Each center will adjust management according to their local guidelines. However, we  
1053 strongly recommend:

1054 - Using low-dose steroids in patients with moderate/severe SARS-CoV-2 infection,  
1055 unless there is a clear contraindication.

1056

1057 10.7.5. Use of sedation / neuromuscular paralysis

1058 Each center will adjust management according to their local guidelines. However, we  
1059 strongly recommend:

1060 - Use of adjusted doses of sedatives (benzodiazepines, opiates, propofol, central  
1061 alpha-2 agonists) according to standard scales to guide depth of sedation.

1062 - Use of relaxation monitoring devices to guide neuromuscular blockade (and for the  
1063 shortest time clinically possible).

1064

1065 10.7.6. Glycemic control

1066 Each center will adjust management according to their local guidelines. However, we  
1067 strongly recommend:

1068 - Maintain glycemia < 180 mg / dL (use of infusion or mobile insulin plans,  
1069 according to local protocol).

1070

1071

1072

1073

1074

1075

1076

1077

1078

1079

1080

1081 **10.8 General Study Flow**

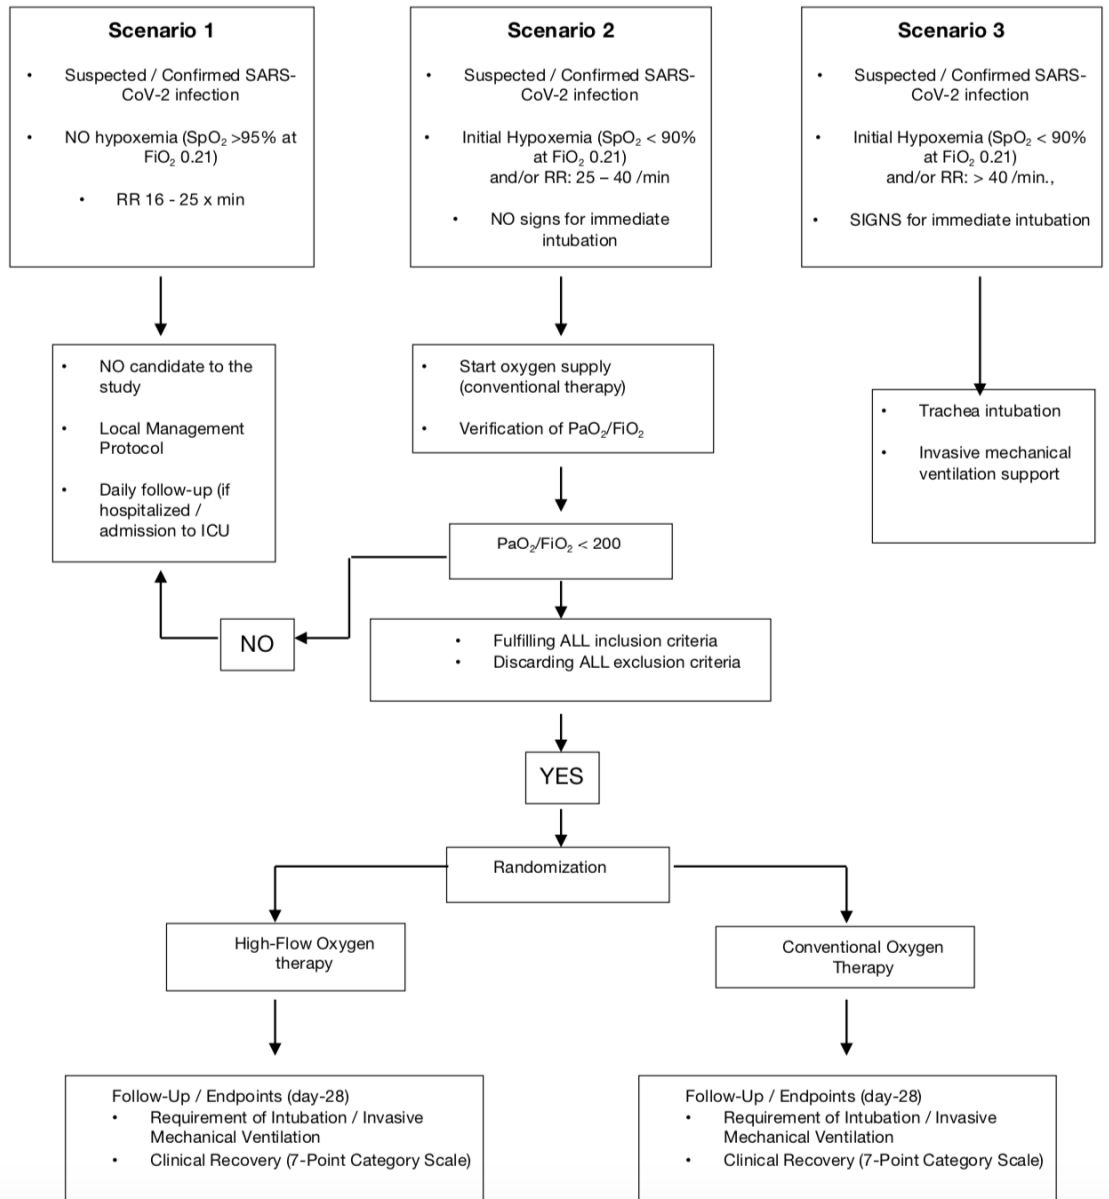

1082

1083

1084

1085

1086

1087

1088 **11. DATA COLLECTION, PATIENT FOLLOW-UP, STUDY**  
1089 **MONITORING AND CLINICAL OUTCOMES.**

1090

1091 11.1 Coordination, Registration and Data Management

1092 The Centro de Investigaciones Clínicas (CIC) of the Fundación Valle del Lili (FVL) will be in  
1093 charge of creating and safeguarding all the screening, inclusion and follow-up records of  
1094 the study. Additionally, an independent statistician adscript to the CIC will be in charge to  
1095 monitor the random allocation of patients during the study. Screening, inclusion, record  
1096 files, CRF and follow-up formats will be managed by coordinators assigned by the CIC-FVL.

1097 The former research committee will be made up of the following participants:

1098 Intensive Care Unit: Dr. Gustavo A. Ospina-Tascón; Dr. Diego F. Bautista Rincón, Dr. Mónica  
1099 P. Vargas Ordóñez, Dr. Alberto F. García (Fundación Valle del Lili Researchers) and at least  
1100 one co-investigator/representative from each of the participating centers.

1101 Research Assistants: CIC-assigned Research Assistants (at the Fundación Valle del Lili, Cali  
1102 - Colombia) and at least one research assistant from each participating center.

1103 Independent data quality surveillance committee (DQSC): CIC-assigned persons not linked  
1104 to the study.

1105 Methodology Committee: CIC Statistics Group – Fundación Valle del Lili, Cali. Colombia.

1106 Technical support: CIC-assigned engineer.

1107

1108 11.2. Patient monitoring / Electronic data capture

1109 Electronic data collection format will be based on the CRF provided in this protocol  
1110 version (See Annex 3: Data Collection Format; Annex 4: Variable Description).

1111 Study coordinators at each site will be responsible for collecting all information required  
1112 by the protocol. Each coordinator will have a digital user profile to upload all information.

1113 Coordinators at each center will also be in charge to evaluate possible serious and non-  
1114 serious adverse events together with the attending physician and the local main  
1115 investigator designed (see Annex 5: Serious Adverse Event Reporting). Occurrence of  
1116 major adverse events should be reported to the local Ethic Committee within 24 hours of  
1117 its detection.

1118

### 1119 11.3 Blood Sampling and Cytokine Measurement

1120 Blood samples will be collected and stored for later measurement of IL-6, IL-8, IL-10.  
1121 These samples will be stored and secured by the Centro de Investigaciones Clínicas -  
1122 Fundación Valle del Lili (Cali, Colombia) until completing the sample size of 220 patients.  
1123 The Fundación Valle del Lili will maintain such blood samples under strict supervision in a  
1124 restricted-access area to guarantee their security and integrity. Once the planned  
1125 measurement of inflammation markers is completed, remaining aliquots will be destroyed  
1126 according to the institutional procedure.

1127

### 1128 11.4. Study Completion

1129 Study completion will be declared when the last subject completes 28 days of follow-up  
1130 from randomization and investigators have completed the last visit evaluation, including  
1131 the follow-up and closure of adverse events. Two additional points will be taken in  
1132 account:

- 1133 - Withdraw from study due to voluntary or administrative reasons: under such  
1134 circumstances, the participant will be excluded from analysis and his/her data  
1135 will not be analyzed for primary and secondary outcomes, unless the participant  
1136 had completed criteria to stop oxygen supply
  
- 1137 - Hospital discharge because satisfactory condition. In such case, a structured  
1138 telephone call will be performed at day 28 to confirm his/her clinical condition  
1139 between hospital discharge and day 28

1140

1141            11.5.    Withdrawal of Informed Consent

1142    The participant or his/her legal representative may voluntarily withdraw consent to  
1143    participate in the study for any reason at any time. In the event of withdrawal of consent,  
1144    study procedures should be suspended, and every effort made to continue follow-up until  
1145    the 28th day. If the participant or his legal representative does not wish to continue  
1146    follow-up either, information from visits after the time of withdrawal of consent should be  
1147    considered missing. If any important safety findings are identified for the subject who has  
1148    withdrawn consent, every effort should be made to communicate this to the participant  
1149    and inform him/her of the actions to be taken. Information collected from individuals  
1150    withdrawing consent will NOT be used in the analyses.

1151

1152

1153

1154

1155

1156

1157

1158



1159

1160

11.6 Follow-Up Schedule

| Visit name                                         | Selection | D1 | D2 | D3 | D4 | D5 | D6 | D7 | D8 | D9 | D10 | D11 | D12 | D13 | D14 | D15 | D16 - D27 | D28 | Discharge ICU | Discharge Hospital |
|----------------------------------------------------|-----------|----|----|----|----|----|----|----|----|----|-----|-----|-----|-----|-----|-----|-----------|-----|---------------|--------------------|
| Activity                                           |           |    |    |    |    |    |    |    |    |    |     |     |     |     |     |     |           |     |               |                    |
| Informed consent                                   | X         |    |    |    |    |    |    |    |    |    |     |     |     |     |     |     |           |     |               |                    |
| Randomization                                      | X         |    |    |    |    |    |    |    |    |    |     |     |     |     |     |     |           |     |               |                    |
| Demographic characteristics                        | X         |    |    |    |    |    |    |    |    |    |     |     |     |     |     |     |           |     |               |                    |
| Inclusion and exclusion criteria                   | X         |    |    |    |    |    |    |    |    |    |     |     |     |     |     |     |           |     |               |                    |
| Medical history chart                              | X         |    |    |    |    |    |    |    |    |    |     |     |     |     |     |     |           |     |               |                    |
| Clinical Antecedents                               | X         |    |    |    |    |    |    |    |    |    |     |     |     |     |     |     |           |     |               |                    |
| <b>Verification of clinical status (follow-up)</b> |           |    |    |    |    |    |    |    |    |    |     |     |     |     |     |     |           |     |               |                    |
| Respiratory symptoms                               | X         |    |    |    |    |    |    |    |    |    |     |     |     |     |     |     |           |     |               |                    |
| Vital signs                                        | X         | X  | X  | X  | X  | X  | X  | X  | X  | X  | X   | X   | X   | X   | X   | X   | X         | X   | X             | X                  |
| <b>Laboratory tests</b>                            |           |    |    |    |    |    |    |    |    |    |     |     |     |     |     |     |           |     |               |                    |
| Blood Count                                        |           | X  | X  | X  | X  | X  | X  | X  |    |    | X   |     |     |     | X   |     |           |     |               |                    |
| Inflammatory markers (IL-6 - IL-8)                 |           | X  |    |    | X  |    |    | X  |    |    | X   |     |     |     |     |     |           |     |               |                    |
| C-reactive Protein                                 |           | X  |    |    | X  |    |    | X  |    |    | X   |     |     |     | X   |     |           |     |               |                    |
| D-Dimer                                            |           | X  |    |    | X  |    |    | X  |    |    | X   |     |     |     | X   |     |           |     |               |                    |
| LDH                                                |           | X  |    |    | X  |    |    | X  |    |    | X   |     |     |     | X   |     |           |     |               |                    |



1167  
1168  
1169

## 12. ETHICAL CONSIDERATIONS

1170 12.1. Risk Level (According to Resolution 8430, Colombian Health Ministry)

1171 The risk implicit in this study is considered to be “greater than the minimum” according to  
1172 Res.008430 of 1993 of the Colombian Ministry of Health, since interventions received by the  
1173 participants will be randomly assigned. However, such interventions are part of conventional  
1174 and accepted therapeutic options for the management of acute hypoxemic respiratory failure:  
1175 conventional oxygen therapy (COT) and high-flow oxygen through a nasal cannula (HFNC). It  
1176 should be clarified and emphasized that requirement for tracheal intubation and invasive  
1177 mechanical ventilation support will be standardized in order to avoid its delay.

1178 This study is designed to adhere to Resolution 2378 of 2008 and the ethical principles of the  
1179 Declaration of Helsinki, highlighting that:

1180 - Maintaining confidentiality of the participants included will protect life, health and privacy.

1181 - An extensive review and discussion among local experts was conducted to support the need  
1182 for this study.

1183 - The results will allow determining if the use of high-flow oxygen therapy through a nasal  
1184 cannula (HFNC) might decrease the need for orotracheal intubation / support with invasive  
1185 mechanical ventilation and promote clinical improvement in patients with acute hypoxemic  
1186 respiratory failure secondary to SARS-CoV-2 infection (severe Covid-19).

1187

1188 12.2. Informed consent

1189

1190 12.2.1. Procedure for taking informed consent: legal considerations

1191 **Justification of the modality of informed consent not initially given by the participant in**  
1192 **written form, or given by a family member as legal representative in written or verbal**  
1193 **form (or combination of the two options) and sometimes with the authorization of an**

1194 **independent physician in the absence of the participant's family member and/or legal**  
1195 **representative.**

1196 Situations leading us to define an alternative procedure for obtaining informed consent  
1197 different from the traditional form, in which speaking directly to the patient/legal  
1198 representative signature of a document is obtained in physical form, along with two witnesses  
1199 and the investigator, are the following:

1200 1. Critically ill patients (with variable degree of hypoxemia) with potential physical and  
1201 mental incapacity to sign the informed consent.

1202 2. Current situation of SARS-CoV-2 pandemic where admission to hospital facilities is  
1203 restricted to reduce risk of infection or virus spreading from symptomatic or asymptomatic  
1204 infected persons, will limit an easy access to family members from potential study  
1205 participants.

1206 3. Contact among family members and health care workers / researchers would potentially  
1207 increase risk of SARS-CoV-2 infection in both ways. Close contact during explanation of the  
1208 study procedures and signing physical legal documents and custody in other places different  
1209 from hospitalization, emergency room, ICU or non-respiratory care areas might also increase  
1210 risk of infection transmission.

1211 4. Severe infection due to SARS Cov-2 might lead to clinical conditions in which therapies  
1212 should be rapidly instituted. In such conditions, patient might not be able to consent and  
1213 contacting his/her legal representative can be complicated.

1214

1215 Once explained such situations, following normative precepts (according to Colombian law)  
1216 are observed:

1217 According to resolution 8430 of 1993 in title II article 14, for research on human beings there  
1218 will be written Informed Consent, by which the research subject or his/her legal  
1219 representative understands and accepts his/her consent, with the exceptions set out in this  
1220 resolution.

1221 According to resolution 8430 of 1993 in Chapter II. On pharmacological research, Article 59,  
1222 paragraph b) "Informed Consent will be obtained from the research subject, or in its absence,  
1223 from the legal representative or the closest family member, except when: the subject's  
1224 condition renders him/her incapable or prevents him/her from giving it, the legal  
1225 representative or family member is unavailable or when discontinuing the use of the  
1226 investigational drug represents an absolute risk of death".

1227 According to the WHO GCP informed consent guidelines, in emergency situations, if it is not  
1228 possible to obtain the subject's informed consent, the consent of the legally acceptable  
1229 representative, if any, should be sought shall. If prior consent of the individual or his/her  
1230 representative is not possible, the inclusion of the individual will be carried out with the  
1231 documented approval of the Ethics Committee to protect the rights, safety and well-being of  
1232 the individual and in accordance with applicable regulatory requirements. The individual or  
1233 his/her legally acceptable representative will be informed of the study as soon as possible and  
1234 will be asked for consent to continue or other consent as appropriate.  
1235 (<https://apps.who.int/medicinedocs/documents/s18627es/s18627es.pdf>)

1236 Guideline 16 of the "International Ethical Guidelines for Research Involving Human Subjects"  
1237 developed by the Council for International Organizations of Medical Sciences (CIOMS) in  
1238 collaboration with the World Health Organization (WHO) describes the following:

1239 "The researcher and the Research Ethics Committee should agree on a maximum time period  
1240 for a person's participation without obtaining the person's informed consent or consent given  
1241 by an authorized third party if the person is still unable to give consent. If individual or  
1242 surrogate consent has not been obtained after this time, the participant should be withdrawn  
1243 from the study provided that the withdrawal does not worsen the participant's situation. The  
1244 participant or his/her representative should have the opportunity to object to the use of data  
1245 derived from the patient's participation without his/her consent or permission. If there is no  
1246 advance directive allowing participation in the research for the period of disability,  
1247 permission must be sought from a legally authorized representative. This permission should  
1248 take into account the participant's preferences and values expressed above, if any. In all cases  
1249 in which research has been approved to begin without the prior consent of persons who are  
1250 incapacitated due to sudden onset conditions, they should be given all relevant information as  
1251 soon as they regain their capacity, and their consent to continue in the study should be

1252 obtained as soon as reasonably possible. In addition, they must be given the opportunity to  
1253 opt out of the study.

1254 A therapeutic window is defined in which the investigator will make every effort to obtain  
1255 consent rather than start without it. A summary of all efforts made will be documented and  
1256 provided to the ethics committee during the continuing review of the study (by the IRB)  
1257 (<https://apps.who.int/medicinedocs/documents/s18627es/s18627es.pdf>).

1258 According to Decree 1377 of 2013, Chapter II, Article 7, Ways to obtain authorization "those  
1259 responsible for the processing of personal data shall establish mechanisms to obtain the  
1260 authorization of the holders or of those who are entitled to it in accordance with the  
1261 provisions of Article 20 of this decree, which guarantee its consultation. These mechanisms  
1262 may be pre-determined through technical means that facilitate the Holder's automated  
1263 manifestation. It shall be understood that the authorization complies with these requirements  
1264 when it is manifested (I) in writing, (II) orally or (III) by means of unequivocal conduct on the  
1265 part of the holder that allows a reasonable conclusion to be drawn that the authorization was  
1266 granted. In no case may silence be assimilated to unequivocal conduct". [http://www.suin-](http://www.suin-juriscol.gov.co/viewDocument.asp?ruta=Decretos/1276081)  
1267 [juriscol.gov.co/viewDocument.asp?ruta=Decretos/1276081](http://www.suin-juriscol.gov.co/viewDocument.asp?ruta=Decretos/1276081)

1268 According to the guidance of the Council for International Organizations of Medical Sciences  
1269 (CIOMS), it states in guideline 9 that consent can be indicated in several ways. The participant  
1270 may express consent verbally or sign a consent form. When consent has been obtained  
1271 verbally, researchers should provide documentation of consent to the Research Ethics  
1272 committee certified by the person obtaining consent or by a witness present at the time of  
1273 obtaining consent.

1274 According to the Council for International Organizations of Medical Sciences (CIOMS)  
1275 guidelines, in Guideline 10, Modifications and Waivers of Informed Consent, "A Research  
1276 Ethics Committee may approve a modification or waiver of informed consent for research if: it  
1277 would not be feasible or practicable to conduct the research without such a waiver or  
1278 modification; the research has significant social value; and the research involves only minimal  
1279 risk to participants. Other provisions may come into play when waivers or modifications of  
1280 informed consent are approved in specific research settings. This allows the Research Ethics  
1281 Committee to even allow for a minor increase in risk above the minimum, and to approve

1282 informed consent (guideline 16). <https://cioms.ch/wp-content/uploads/2017/12/CIOMS->  
 1283 EthicalGuideline\_SP\_INTERIOR-FINAL.pdf

1284 And finally, according to the GUIDE FOR RESEARCH ETHICS COMMITTEES of the INVIMA, it is  
 1285 stipulated that the Committee of Ethics is the maximum authority within the Research Center  
 1286 in what concerns the maintenance of the integrity of the research participant.  
 1287 <https://www.invima.gov.co/documents/20143/453029/ASS-RSA-GU040.pdf/96ea752d->  
 1288 2639-3024-4287-4527589fb26b

1289

1290 Under such national and international regulations, the following flow to obtain informed  
 1291 consent for the current study is considered:

1292

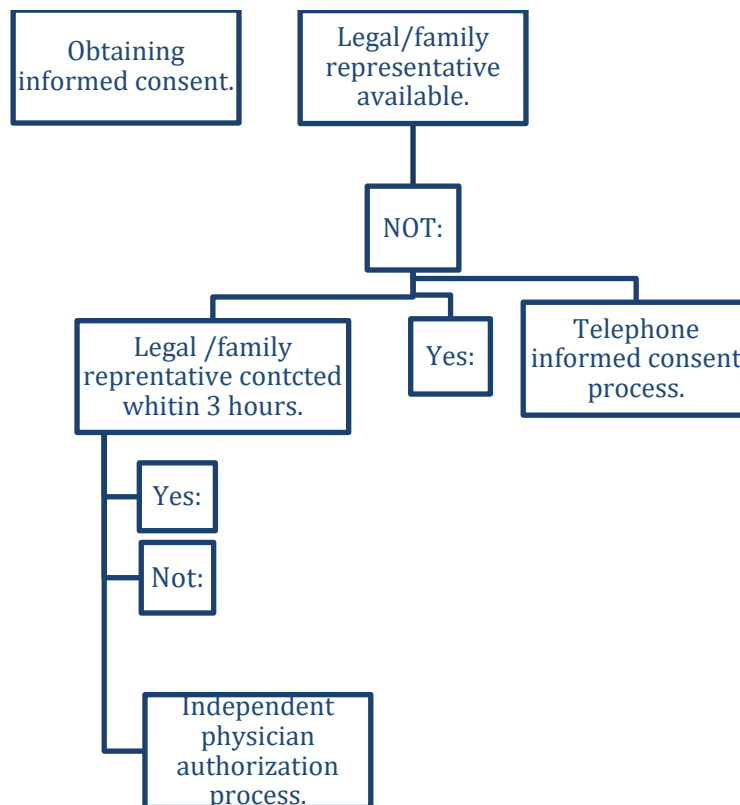

1293

1294

1295

1296 Therapeutic window considered to locate the legal representative in case he/she is not  
1297 available at the time the patient is considered to meet the criteria to enter the study will be 3  
1298 hours, after that time without locating him, the authorization will be used by an independent  
1299 physician.

1300 The following information will be provided to the legal representative in order to obtain  
1301 consent:

- 1302 • Purpose of the trial and procedures.
- 1303 • Study inclusion criteria and duration of interventions and follow-up.
- 1304 • Risks and benefits.
- 1305 • Confidentiality of information.
- 1306 • Payments and compensation.

1307

1308 An electronic informed consent will be obtained by direct interview with the participant or  
1309 legal representative. A phone call for a legal representative might be accepted (if no possible  
1310 to have direct contact –according to the particular situation during pandemic). If consent  
1311 would be obtained by a phone call, it will be recorded and then sent it to the local ethics  
1312 committee as evidence of the process. In any case, a copy form of the consent will be given to  
1313 the patient and to a family member/legal representative. Once the patient or representative  
1314 agree with participate, their full identification data and acceptance should be recorded. The  
1315 participant and/or representative should sign the document and an electronic copy should be  
1316 sent back to his/her address if requested.

1317 If no legal representative is able to authorize participation in the trial, a meeting between two  
1318 physicians (one of whom is an independent physician not participating in the trial) will be  
1319 contemplated, considering all eligibility and exclusion criteria and also considering some  
1320 known opinion about trial participation previously issued by the patient. After such meeting,  
1321 the two physicians will decide about to enroll or not the patient into the trial. In all cases, this  
1322 process SHOULD be followed by a representative authorization to participate within the next



1323 72 hours; otherwise, the patient would be removed from the trial. Document to be used for  
1324 this process will have prior approval by the Biomedical Research Ethics Committee.

1325 In the event that participants regain physical and mental capacity to give consent, they will  
1326 receive complete information about the study (informed consent form) and will be requested  
1327 to continue the trial. Patients and representatives can withdraw consent at any time.

1328

1329

1330

1331

1332

1333

1334

1335

1336

1337

1338

1339

1340

1341

1342

1343

1344

1345 **13. ADVERSE EVENTS REPORTING**

1346

1347 Serious adverse event reporting will encompass all possible events that might be related with  
1348 the application of high-flow or conventional oxygen therapies and the potential effects of  
1349 hypoxemia because possible delays in tracheal intubation or escalation to other advanced life  
1350 support modalities. Principal investigator at each site will be committed to manage  
1351 compliance and adherence to the protocol and also to identify adverse events potentially  
1352 related or not with the study interventions.

1353 Adverse events should be recorded along with:

- 1354 - Identification of the study participant.
- 1355 - Time from randomization to occurrence of the event.
- 1356 - Identification of possible causality between the event and the study intervention  
1357 (high-flow oxygen or conventional oxygen therapies)
- 1358 - Resolution or improvement of such adverse event.

1359

1360 **13.1. Monitoring of adverse events (AE)**

1361 All adverse events (AEs) occurring within 28 days from randomization should be reported to  
1362 their respective ethics committee following the Serious Adverse Event (SAE) reporting  
1363 guidelines, maintaining confidentiality principles. It is recommended performing such report  
1364 within 24 hours from the event when SAE is death. In all cases, AEs will be reported to the  
1365 study's coordinating center (CIC – Fundación Valle del Lili), which will collect data for analysis  
1366 during programmed meetings of the Steering Committee and Safety Monitoring Board.

1367

1368            13.3. Data Safety Monitoring Board

1369            As previously mentioned, the Data Safety Monitoring Board (DSMB) will be made up of two  
1370            highly reputed international experts in critical care medicine and an international statistician,  
1371            all independent from the HiFlo-Covid Investigators. DSMB will be responsible to conduct the  
1372            interim analysis when 50% of the sample has completed the 28-day follow-up. Such analysis  
1373            will include the occurrence of serious adverse events recorded during this period (see 9.8.2.  
1374            Interim analysis plan).

1375

1376

1377

1378

1379

1380

1381

1382

1383

1384

1385

1386

1387

1388

1389

1390

1391

1392

1393 **ANNEX 1. INCLUSION / EXCLUSION FORMAT**

1394 INCLUSION/EXCLUSION FORMAT:

1395 Institution: \_\_\_\_\_ Medical History # : \_\_\_\_\_

1396 First name: \_\_\_\_\_ Surname: \_\_\_\_\_

1397 Initials for registration: \_\_\_\_ \_

1398 Inclusion / Exclusion Criteria:

1399

|   | <b>INCLUSION CRITERIA</b>                                                                                                                                                                                                                                                                                                                                                               |     |    |
|---|-----------------------------------------------------------------------------------------------------------------------------------------------------------------------------------------------------------------------------------------------------------------------------------------------------------------------------------------------------------------------------------------|-----|----|
| 1 | Adult > 18 years old.                                                                                                                                                                                                                                                                                                                                                                   | YES | NO |
| 2 | Suspected / confirmed case of SARS-CoV-2 infection (according to internal definitions).                                                                                                                                                                                                                                                                                                 | YES | NO |
| 3 | Moderate / severe acute hypoxemic respiratory failure: PaO <sub>2</sub> /FiO <sub>2</sub> ratio < 200.                                                                                                                                                                                                                                                                                  | YES | NO |
| 4 | Signs of acute respiratory distress; at least 1 of the following: <ul style="list-style-type: none"> <li>- Increased accessory muscle contraction.</li> <li>- Tonic contraction of the sternocleidomastoid muscle</li> <li>- Supra-sternal retraction.</li> <li>- Intercostal retraction.</li> <li>- Tracheal "tapping" to the neck.</li> <li>- Thoraco-abdominal imbalance.</li> </ul> | YES | NO |
| 5 | Respiratory rate > 25 x minute.                                                                                                                                                                                                                                                                                                                                                         | YES | NO |
| 6 | Less than 6 hours since the definition of moderate/severe acute respiratory failure secondary to suspected/confirmed SARS-CoV-2 infection.                                                                                                                                                                                                                                              | YES | NO |
|   | <b>EXCLUSION CRITERIA</b>                                                                                                                                                                                                                                                                                                                                                               |     |    |
| 1 | < 18 years.                                                                                                                                                                                                                                                                                                                                                                             | YES | NO |
| 2 | Indication for immediate tracheal intubation.                                                                                                                                                                                                                                                                                                                                           | YES | NO |
| 3 | Pregnant woman / positive pregnancy test at potential study entry.                                                                                                                                                                                                                                                                                                                      | YES | NO |
| 4 | Chronic liver disease / liver cirrhosis Child-Pugh C.                                                                                                                                                                                                                                                                                                                                   | YES | NO |
| 5 | Confirmation of active bacterial or fungal infection.                                                                                                                                                                                                                                                                                                                                   | YES | NO |
| 5 | Uncontrolled HIV/AIDS disease (defined by presence of viral load > 200 copies/mL).                                                                                                                                                                                                                                                                                                      | YES | NO |
| 6 | Previous history of COPD Gold C - D.                                                                                                                                                                                                                                                                                                                                                    | YES | NO |
| 7 | History of COPD with hospitalization / ICU in the last year.                                                                                                                                                                                                                                                                                                                            | YES | NO |
| 8 | Known history of congestive heart failure NYHA III - IV.                                                                                                                                                                                                                                                                                                                                | YES | NO |

|    |                                                                                                                                                                              |     |    |
|----|------------------------------------------------------------------------------------------------------------------------------------------------------------------------------|-----|----|
| 9  | Left ventricular ejection fraction < 45% previously known (or actual)                                                                                                        | YES | NO |
| 10 | Clinically suspected or confirmed cardiogenic pulmonary edema.                                                                                                               | YES | NO |
| 11 | Hypercapnic respiratory failure (PaCO <sub>2</sub> > 55 mmHg).                                                                                                               | YES | NO |
| 12 | Central/peripheral demyelinating disorders due to medical history or high suspicion of these at the time of eligibility for the study.                                       | YES | NO |
| 13 | Dying / NO Resuscitation Order.                                                                                                                                              | YES | NO |
| 14 | Any serious medical condition or clinical laboratory test abnormality that, in the investigator's judgment, prevents safe patient participation and completion of the study. | YES | NO |
| 15 | Participation in another clinical trial (except one related to SARS-CoV-2 - CRITERIA TO BE DISCUSSED BETWEEN MAIN GROUP OF RESEARCHERS).                                     | YES | NO |
|    |                                                                                                                                                                              |     |    |
|    | <b>INCLUSION IN THE STUDY IF NOT</b>                                                                                                                                         | YES | NO |
|    | Date:                                                                                                                                                                        |     |    |

1400

1401

1402 **Suspected Moderate Case**

1403 A patient will be considered in this category when meet ALL the following parameters:

- 1404 - **Signs and symptoms consistent with SARS-CoV-2 infection not explained by any other**  
1405 **previously known or current clinical condition** (bacterial or viral infectious; autoimmune;  
1406 neoplastic): fever, cough, odynophagia/anosmia and dyspnea.  
1407 - Radiological signs compatible with pneumonia consisting of interstitial / alveolar infiltrates in  
1408 the chest X-ray and/or frosted glass infiltrates in chest CT scan (suggestive of viral infection).  
1409 - Initial hypoxemia (SpO<sub>2</sub> < 90% at FiO<sub>2</sub> 0.21) and/or respiratory rate > 25/min, requiring  
1410 oxygen supplementation at 0.28 < FiO<sub>2</sub> < 0.60 to achieve SpO<sub>2</sub> > 92% (at least 5 minutes after  
1411 SpO<sub>2</sub> signal stabilization).  
1412 - Confirmed **100 < PaO<sub>2</sub>/FiO<sub>2</sub> < 200** (according to arterial gas analysis), **WITHOUT evidence of**  
1413 **extra-pulmonary organ dysfunction** (extra-pulmonary SOFA score > 2 points).

1414

1415 **Suspected Severe Case**

1416 A patient will be considered in this category when meet ALL the following parameters:

- 1417 - **Signs and symptoms consistent with SARS-CoV-2 infection not explained by any other**  
1418 **previously known or current clinical condition** (bacterial or viral infectious; autoimmune;  
1419 neoplastic): fever, cough, odynophagia/anosmia and dyspnea.

- 1420 - Radiological signs compatible with pneumonia consisting of interstitial / alveolar infiltrates in  
1421 the chest X-ray and/or frosted glass infiltrates in chest CT scan (suggestive of viral infection).  
1422 - Initial hypoxemia ( $SpO_2 < 90\%$  at  $FiO_2 0.21$ ) and/or respiratory rate  $> 25/\text{min}$ , requiring  
1423 oxygen supplementation at  $0.28 < FiO_2 < 0.60$  to achieve  $SpO_2 > 92\%$  (at least 5 minutes after  
1424  $SpO_2$  signal stabilization).  
1425 - Confirmed  $PaO_2/FiO_2 < 100$  (according to arterial gas analysis), **AND / OR evidence of extra-**  
1426 **pulmonary organ dysfunction** (extra-pulmonary SOFA score  $> 2$  points).

1427

#### 1428 **Confirmed Moderate Case**

1429 A patient will be considered in this category when meet ALL the following parameters:

- 1430 - **Confirmed SARS-CoV-2 infection by genomic detection** from an upper or lower airway  
1431 sample in presence of compatible symptoms: fever, cough, odynophagia / anosmia and  
1432 dyspnea.  
1433 - Radiological signs compatible with pneumonia consisting of interstitial / alveolar infiltrates in  
1434 the chest X-ray and/or frosted glass infiltrates in chest CT scan (suggestive of viral infection).  
1435 - Initial hypoxemia ( $SpO_2 < 90\%$  at  $FiO_2 0.21$ ) and/or respiratory rate  $> 25/\text{min}$ , requiring  
1436 oxygen supplementation at  $0.28 < FiO_2 < 0.60$  to achieve  $SpO_2 > 92\%$  (at least 5 minutes after  
1437  $SpO_2$  signal stabilization).  
1438 - Confirmed  $100 < PaO_2/FiO_2 < 200$  (according to arterial gas analysis), **WITHOUT evidence of**  
1439 **extra-pulmonary organ dysfunction** (extra-pulmonary SOFA score  $> 2$  points).

1440

1441

#### 1442 **Confirmed Severe Case**

1443 A patient will be considered in this category when they meet ALL of the following parameters:

- 1444 - **Confirmed SARS-CoV-2 infection by genomic detection** from an upper or lower airway  
1445 sample in presence of compatible symptoms: fever, cough, odynophagia / anosmia and  
1446 dyspnea.  
1447 - Radiological signs compatible with pneumonia consisting of interstitial / alveolar infiltrates in  
1448 the chest X-ray and/or frosted glass infiltrates in chest CT scan (suggestive of viral infection).  
1449 - Initial hypoxemia ( $SpO_2 < 90\%$  at  $FiO_2 0.21$ ) and/or respiratory rate  $> 25/\text{min}$ , requiring  
1450 oxygen supplementation at  $0.28 < FiO_2 < 0.60$  to achieve  $SpO_2 > 92\%$  (at least 5 minutes after  
1451  $SpO_2$  signal stabilization).  
1452 - **Confirmation of  $PaO_2/FiO_2 < 100$**  (according to arterial gas analysis), **AND / OR evidence of**  
1453 **extra-pulmonary organ dysfunction** (extra-pulmonary SOFA score  $> 2$  points).

1454

1455

1456

1457 **ANNEX 2. SCREENING FORMAT**

1458

1459 Screening summary

1460 Hospital: \_\_\_\_\_

|    | ID | Randomization |    | Cause of NON-randomization<br>(enter hit number to list) |
|----|----|---------------|----|----------------------------------------------------------|
|    |    | YES           | NO |                                                          |
| 1  |    |               |    |                                                          |
| 2  |    |               |    |                                                          |
| 3  |    |               |    |                                                          |
| 4  |    |               |    |                                                          |
| 5  |    |               |    |                                                          |
| 6  |    |               |    |                                                          |
| 7  |    |               |    |                                                          |
| 8  |    |               |    |                                                          |
| 9  |    |               |    |                                                          |
| 10 |    |               |    |                                                          |
| 11 |    |               |    |                                                          |
| 12 |    |               |    |                                                          |
| 13 |    |               |    |                                                          |
| 14 |    |               |    |                                                          |
| 15 |    |               |    |                                                          |
| 16 |    |               |    |                                                          |
| 17 |    |               |    |                                                          |
| 18 |    |               |    |                                                          |
| 19 |    |               |    |                                                          |
| 20 |    |               |    |                                                          |
| 21 |    |               |    |                                                          |
| 22 |    |               |    |                                                          |
| 23 |    |               |    |                                                          |
| 24 |    |               |    |                                                          |
| 25 |    |               |    |                                                          |
| 26 |    |               |    |                                                          |
| 27 |    |               |    |                                                          |
| 28 |    |               |    |                                                          |
| 29 |    |               |    |                                                          |
| 30 |    |               |    |                                                          |

1461 Causes of non-inclusion:

- 1462 1. Incomplete inclusion criteria
- 1463 2. Presence of some exclusion criteria.
- 1464 3. Immediate intubation criteria.
- 1465 4. NO high-flow nasal cannula available (at time of randomization).
- 1466 5. > 6 hours from compliance with moderate/severe hypoxemic respiratory failure criteria.
- 1467 6. Refusal of Treating Physician to Participate or Use Assigned Device.
- 1468 7. Denial of informed consent.

1469 **ANNEX 3. CASE REPORT FORMAT (CRF)**

1470

1471 **1. GENERAL DATA AND MEDICAL HISTORY**

1472

1473 **Record ID:** \_\_\_\_\_

1474 **Hospital:**

1475 \_\_\_\_\_

1476 **Name:** \_\_\_\_\_ **c.c. / ID:** \_\_\_\_\_

1477 **Age:** \_\_\_\_ **yo** **Gender:** **M** \_\_\_\_ **F** \_\_\_\_ **Height:** \_\_\_\_ **cm** **weight:** \_\_\_\_ **kg** **BMI:** \_\_\_\_

1478

| Clinical Antecedents      |  |                       |  |                        |  |
|---------------------------|--|-----------------------|--|------------------------|--|
| Chronic heart failure     |  | CKD stage III - IV    |  | Hydroxychloroquine use |  |
| Coronary artery disease   |  | CKD stage V           |  | Azithromycin use       |  |
| Connective tissue disease |  | Cirrhosis Child A - B |  | Steroids use           |  |
| Diabetes                  |  | COPD Gold A - C       |  | iECA use               |  |
| Arterial hypertension     |  | History of AIS        |  | Inh. ARA-II use        |  |

1479

1480 **2. SIGNS AND SYMPTOMS**

1481

1482 **Symptoms onset date:** DD / MM / YYYY

1483 **Days after symptoms onset to randomization:** \_\_\_\_\_ **days**

1484

| Symptoms            |  |                       |  |                     |  |
|---------------------|--|-----------------------|--|---------------------|--|
| Fever               |  | Dyspnea               |  | Cough               |  |
| Odynophagia         |  | Anosmia and dysgeusia |  | Vomiting / Diarrhea |  |
| Asthenia / Adynamia |  | Muscular pain         |  |                     |  |

1485

1486

1487

1488 **3. HOSPITAL ADMISSION DATA**

1489

1490 **Date of hospital admission :** DD / MM / YYYY **Hour:** \_\_\_\_\_

1491

1492

|     |  |     |  |                  |  |                             |  |
|-----|--|-----|--|------------------|--|-----------------------------|--|
| SAP |  | MAP |  | Temp             |  | Capillary refill time (CRT) |  |
| DAP |  | HR  |  | SpO <sub>2</sub> |  |                             |  |

1493

1494 **4. RANDOMIZATION**

1495

1496 **Randomization date:** DD / MM / YYYY **Hour:** \_\_\_\_\_

1497 **SOFA (admission):** \_\_\_\_\_ **APACHE II:** \_\_\_\_\_ **NEWS II:** \_\_\_\_\_



1498 **BASELINE LABS**

| STUDY ENTRY LABORATORIES |  |             |  |          | 1499 |
|--------------------------|--|-------------|--|----------|------|
| pH                       |  | PTT         |  | PCR      | 1501 |
| pCO <sub>2</sub>         |  | Fibrinogen  |  | LDH      | 1502 |
| pO <sub>2</sub>          |  | Leucocyte   |  | Ferritin | 1503 |
| HCO <sub>3</sub>         |  | Neutrophils |  | D-dimer  | 1504 |
| BE ecf/std               |  | Lymphocytes |  | IL-6     | 1505 |
| Lactate                  |  | Macrophage  |  | IL-8     | 1506 |
| Hemoglobin               |  | NLR         |  | Creat    | 1507 |
| Hematocrit               |  | Bilirrubin  |  | BUN      | 1508 |
| Platelet                 |  | AST         |  | Troponin | 1509 |
| PT                       |  | ALT         |  |          | 1510 |
|                          |  |             |  |          | 1511 |
|                          |  |             |  |          | 1512 |

1513

1514

1515

**RESPIRATORY SUPPORT PRE AND POST IMMEDIATE RANDOMIZATION**

| PRE RANDOMIZATION          |       |                                    |  |                    |
|----------------------------|-------|------------------------------------|--|--------------------|
| Respiratory support        |       | Arterial blood gas                 |  | Clinical signs     |
| Conventional nasal cannula |       | pH                                 |  | Respiratory rate   |
| Venturi mask               |       | pO <sub>2</sub>                    |  | Heart rate         |
| Mask with reservoir        |       | FiO <sub>2</sub> (%)               |  | SpO <sub>2</sub>   |
|                            | L/min | PaO <sub>2</sub> /FiO <sub>2</sub> |  | BORG Scale         |
|                            |       | SaO <sub>2</sub>                   |  | Glasgow Coma Score |

1516

| POST RANDOMIZATION (2 Hours) |       |                                    |  |                                               |
|------------------------------|-------|------------------------------------|--|-----------------------------------------------|
| Respiratory support          |       | Arterial blood gas                 |  | Clinical signs                                |
| HFNC                         |       | pH                                 |  | Respiratory rate                              |
| Conventional nasal cannula   |       | pO <sub>2</sub>                    |  | Heart rate                                    |
| Venturi mask                 |       | FiO <sub>2</sub> (%)               |  | SpO <sub>2</sub>                              |
| Mask with reservoir          |       | PaO <sub>2</sub> /FiO <sub>2</sub> |  | Signs of acute respiratory distress (Yes/Not) |
|                              | L/min | SaO <sub>2</sub>                   |  | En. Intubation. (Yes/Not)                     |
|                              |       |                                    |  | BORG Scale                                    |
|                              |       |                                    |  | Glasgow Coma Score                            |

1517

1518

| POST RANDOMIZATION (4 Hours) |  |                                    |  |                                               |
|------------------------------|--|------------------------------------|--|-----------------------------------------------|
| Respiratory support          |  | Arterial blood gas                 |  | Clinical signs                                |
| HFNC                         |  | pH                                 |  | Respiratory rate                              |
| Conventional nasal cannula   |  | pO <sub>2</sub>                    |  | Heart rate                                    |
| Venturi mask                 |  | FiO <sub>2</sub> (%)               |  | SpO <sub>2</sub>                              |
| Mask with reservoir          |  | PaO <sub>2</sub> /FiO <sub>2</sub> |  | Signs of acute respiratory distress (Yes/Not) |

|       |  |                  |  |                           |  |
|-------|--|------------------|--|---------------------------|--|
| L/min |  | SaO <sub>2</sub> |  | En. Intubation. (Yes/Not) |  |
|       |  |                  |  | BORG Scale                |  |
|       |  |                  |  | Glasgow Coma Score        |  |

1519

1520

5. FOLLOW-UP

| RESPIRATORY                                             |                                                                               |       |       |       |       |       |       |       |
|---------------------------------------------------------|-------------------------------------------------------------------------------|-------|-------|-------|-------|-------|-------|-------|
| Variable                                                |                                                                               | Day 1 | Day 2 | Day 3 | Day 4 | Day 5 | Day 6 | Day 7 |
| <b>HFNC Group</b>                                       |                                                                               |       |       |       |       |       |       |       |
| HFNC start (date)                                       | DD / MM / YYYY                                                                |       |       |       |       |       |       |       |
| HFNC end (date)                                         | DD / MM / YYYY                                                                |       |       |       |       |       |       |       |
| Intubation (1. Yes / 0. No)                             |                                                                               |       |       |       |       |       |       |       |
| FiO <sub>2</sub> (higher)                               |                                                                               |       |       |       |       |       |       |       |
| L/Min (higher)                                          |                                                                               |       |       |       |       |       |       |       |
| Awake Prone (1. Yes / 0. No)                            |                                                                               |       |       |       |       |       |       |       |
| Hours on Awake Prone                                    |                                                                               |       |       |       |       |       |       |       |
| <b>COT Group</b>                                        |                                                                               |       |       |       |       |       |       |       |
| COT start (date)                                        | DD / MM / YYYY                                                                |       |       |       |       |       |       |       |
| COT end (date)                                          | DD / MM / YYYY                                                                |       |       |       |       |       |       |       |
| Intubation (1. Yes / 0. No)                             |                                                                               |       |       |       |       |       |       |       |
| FiO <sub>2</sub> (higher)                               |                                                                               |       |       |       |       |       |       |       |
| L/Min (higher)                                          |                                                                               |       |       |       |       |       |       |       |
| Awake Prone (1. Yes / 0. No)                            |                                                                               |       |       |       |       |       |       |       |
| Hours on Awake Prone                                    |                                                                               |       |       |       |       |       |       |       |
| <b>Endotracheal Intubation Requirement</b>              | 1. Yes / 0. No                                                                |       |       |       |       |       |       |       |
| <b>INTUBATION CRITERIA</b>                              | <b>Persistent signs of respiratory failure despite oxygen supplementation</b> |       |       |       |       |       |       |       |
|                                                         | • Respiratory rate > 40 / minute.                                             |       |       |       |       |       |       |       |
|                                                         | • Lack of improvement in signs of respiratory muscle fatigue.                 |       |       |       |       |       |       |       |
|                                                         | • Increased and mismanaged bronchial secretions.                              |       |       |       |       |       |       |       |
|                                                         | • Acidosis – pH < 7.25                                                        |       |       |       |       |       |       |       |
|                                                         | • PaO <sub>2</sub> < 55 mmHg                                                  |       |       |       |       |       |       |       |
| • PaCO <sub>2</sub> > 55 mmHg (accompanied by acidosis) |                                                                               |       |       |       |       |       |       |       |

|  |                                                                                                                                                                                                                                                                 |
|--|-----------------------------------------------------------------------------------------------------------------------------------------------------------------------------------------------------------------------------------------------------------------|
|  | <ul style="list-style-type: none"> <li>SpO<sub>2</sub> &lt; 92% for more than 5 minutes (ruling out signal problems in its measurement) receiving the maximum possible substitution with its respective respiratory support strategy (HFNC vs. COT).</li> </ul> |
|  | <b>Hemodynamic signs</b>                                                                                                                                                                                                                                        |
|  | <ul style="list-style-type: none"> <li>Persistent SBP &lt; 90 mmHg or MAP &lt; 60 mmHg, with requirement for vasopressor support (Noradrenaline &gt; 0.10 µgr/kg/min) in the presence of adequate intravascular volume.</li> </ul>                              |
|  | <ul style="list-style-type: none"> <li>Progression of clinical signs of tissue hypoperfusion: capillary filling &gt; 10 seconds; Mottling score ≥ 4.</li> </ul>                                                                                                 |
|  | <ul style="list-style-type: none"> <li>Arterial lactate ≥ 4 mmol/L in the presence of any clinical signs of hypoperfusion (capillary filling &gt; 3 seconds; Mottling score ≥ 2).</li> </ul>                                                                    |
|  | <b>Neurological signs.</b>                                                                                                                                                                                                                                      |
|  | <ul style="list-style-type: none"> <li>Deterioration of consciousness (Glasgow Coma Scale ≤ 12 points).</li> </ul>                                                                                                                                              |
|  | <b>Other criteria</b>                                                                                                                                                                                                                                           |

**Invasive mechanical ventilation**

|                      |                |  |  |  |  |  |  |  |  |
|----------------------|----------------|--|--|--|--|--|--|--|--|
| Start (date)         | DD / MM / YYYY |  |  |  |  |  |  |  |  |
| End (date)           | DD / MM / YYYY |  |  |  |  |  |  |  |  |
| Mode                 |                |  |  |  |  |  |  |  |  |
| Tidal volume         |                |  |  |  |  |  |  |  |  |
| Tidal volume (mL/Kg) |                |  |  |  |  |  |  |  |  |
| RR                   |                |  |  |  |  |  |  |  |  |
| PEEP                 |                |  |  |  |  |  |  |  |  |
| Ppeak                |                |  |  |  |  |  |  |  |  |
| Pplat                |                |  |  |  |  |  |  |  |  |
| Cest                 |                |  |  |  |  |  |  |  |  |
| Cdin                 |                |  |  |  |  |  |  |  |  |
| Driving pressure     |                |  |  |  |  |  |  |  |  |

1521  
1522  
1523

| LABORATORIES      |       |       |       |       |       |       |       |        |        |
|-------------------|-------|-------|-------|-------|-------|-------|-------|--------|--------|
| Variable          | Day 1 | Day 2 | Day 3 | Day 4 | Day 5 | Day 6 | Day 7 | Day 10 | Day 14 |
| pH                |       |       |       |       |       |       |       |        |        |
| PaCO <sub>2</sub> |       |       |       |       |       |       |       |        |        |
| PaO <sub>2</sub>  |       |       |       |       |       |       |       |        |        |
| HCO <sub>3</sub>  |       |       |       |       |       |       |       |        |        |

|                |  |  |  |  |  |  |  |  |  |  |
|----------------|--|--|--|--|--|--|--|--|--|--|
| BE ecf / std   |  |  |  |  |  |  |  |  |  |  |
| Lactate        |  |  |  |  |  |  |  |  |  |  |
| Hemoglobin     |  |  |  |  |  |  |  |  |  |  |
| Hematocrit     |  |  |  |  |  |  |  |  |  |  |
| Leucocyte      |  |  |  |  |  |  |  |  |  |  |
| Neutrophils    |  |  |  |  |  |  |  |  |  |  |
| Lymphocytes    |  |  |  |  |  |  |  |  |  |  |
| Macrophage     |  |  |  |  |  |  |  |  |  |  |
| NLR            |  |  |  |  |  |  |  |  |  |  |
| Platelet       |  |  |  |  |  |  |  |  |  |  |
| PCR            |  |  |  |  |  |  |  |  |  |  |
| Bilirrubin     |  |  |  |  |  |  |  |  |  |  |
| AST            |  |  |  |  |  |  |  |  |  |  |
| ALT            |  |  |  |  |  |  |  |  |  |  |
| PCR            |  |  |  |  |  |  |  |  |  |  |
| Ferritin       |  |  |  |  |  |  |  |  |  |  |
| LDH            |  |  |  |  |  |  |  |  |  |  |
| D-dimer        |  |  |  |  |  |  |  |  |  |  |
| Interleukin 6  |  |  |  |  |  |  |  |  |  |  |
| Interleukin 8  |  |  |  |  |  |  |  |  |  |  |
| Interleukin 10 |  |  |  |  |  |  |  |  |  |  |

1524

| HEMODYNAMICS / PERFUSION     |       |       |       |       |       |       |       |        |        |  |
|------------------------------|-------|-------|-------|-------|-------|-------|-------|--------|--------|--|
| Variable                     | Day 1 | Day 2 | Day 3 | Day 4 | Day 5 | Day 6 | Day 7 | Day 10 | Day 14 |  |
| SAP                          |       |       |       |       |       |       |       |        |        |  |
| DAP                          |       |       |       |       |       |       |       |        |        |  |
| PAM                          |       |       |       |       |       |       |       |        |        |  |
| Heart Rate                   |       |       |       |       |       |       |       |        |        |  |
| Temperature                  |       |       |       |       |       |       |       |        |        |  |
| SpO <sub>2</sub>             |       |       |       |       |       |       |       |        |        |  |
| Capillary Refill Time (sec.) |       |       |       |       |       |       |       |        |        |  |

1525

| MULTIPLE ORGAN DYSFUNCTION - SOFA |                                     |       |       |       |       |       |       |       |        |        |
|-----------------------------------|-------------------------------------|-------|-------|-------|-------|-------|-------|-------|--------|--------|
| SOFA                              |                                     | Day 1 | Day 2 | Day 3 | Day 4 | Day 5 | Day 6 | Day 7 | Day 10 | Day 14 |
| SOFA Respiratory                  | PaO <sub>2</sub>                    |       |       |       |       |       |       |       |        |        |
|                                   | FiO <sub>2</sub>                    |       |       |       |       |       |       |       |        |        |
|                                   | PaO <sub>2</sub> / FiO <sub>2</sub> |       |       |       |       |       |       |       |        |        |
|                                   | Score                               |       |       |       |       |       |       |       |        |        |
| SOFA Cardiovascular               | MAP                                 |       |       |       |       |       |       |       |        |        |

|                    |                    |  |  |  |  |  |  |  |  |
|--------------------|--------------------|--|--|--|--|--|--|--|--|
|                    | Vasopressor        |  |  |  |  |  |  |  |  |
|                    | Inodilator         |  |  |  |  |  |  |  |  |
|                    | Score              |  |  |  |  |  |  |  |  |
| SOFA Renal         | Creatinine         |  |  |  |  |  |  |  |  |
|                    | Urine output       |  |  |  |  |  |  |  |  |
|                    | Score              |  |  |  |  |  |  |  |  |
| SOFA Liver         | Bilirubin          |  |  |  |  |  |  |  |  |
|                    | Score              |  |  |  |  |  |  |  |  |
| SOFA Coagulation   | Platelet           |  |  |  |  |  |  |  |  |
|                    | Score              |  |  |  |  |  |  |  |  |
| SOFA CNS           | Glasgow Coma Scale |  |  |  |  |  |  |  |  |
|                    | Score              |  |  |  |  |  |  |  |  |
| SOFA (total score) |                    |  |  |  |  |  |  |  |  |

1526

| 7-point Clinical Scale |        |        |        |        |        |        |        |        |        |  |
|------------------------|--------|--------|--------|--------|--------|--------|--------|--------|--------|--|
| 7-point Clinical Scale | Day 1  | Day 2  | Day 3  | Day 4  | Day 5  | Day 6  | Day 7  | Day 8  | Day 9  |  |
|                        |        |        |        |        |        |        |        |        |        |  |
|                        | Day 10 | Day 11 | Day 12 | Day 13 | Day 14 | Day 15 | Day 16 | Day 17 | Day 18 |  |
|                        |        |        |        |        |        |        |        |        |        |  |
|                        | Day 19 | Day 20 | Day 21 | Day 22 | Day 23 | Day 24 | Day 25 | Day 26 | Day 27 |  |
|                        |        |        |        |        |        |        |        |        |        |  |
|                        | Day 28 |        |        |        |        |        |        |        |        |  |

1527

1528

1529

1530

## 6. ADJUVANT THERAPIES

| Adjuvant therapies |                 |                |                |      |
|--------------------|-----------------|----------------|----------------|------|
| Treatment          | 1. Yes / 0. Not | Start date     | End date       | Dose |
| Hydroxychloroquine |                 | DD / MM / YYYY | DD / MM / YYYY |      |
| Azithromycin       |                 | DD / MM / YYYY | DD / MM / YYYY |      |
| Ivermectin         |                 | DD / MM / YYYY | DD / MM / YYYY |      |
| Dexamethasone      |                 | DD / MM / YYYY | DD / MM / YYYY |      |
| Methylprednisolone |                 | DD / MM / YYYY | DD / MM / YYYY |      |
| Tocilizumab        |                 | DD / MM / YYYY | DD / MM / YYYY |      |

1531

1532

1533

1534

1535  
1536

## 7. RESUSCITATION FLUIDS

| Resuscitation and fluid balance |       |       |       |       |       |       |       |
|---------------------------------|-------|-------|-------|-------|-------|-------|-------|
|                                 | Day 1 | Day 2 | Day 3 | Day 4 | Day 5 | Day 6 | Day 7 |
| Total resuscitation fluids (mL) |       |       |       |       |       |       |       |
| Crystalloids (mL)               |       |       |       |       |       |       |       |
| Colloids (mL)                   |       |       |       |       |       |       |       |
| Trasfusion (mL)                 |       |       |       |       |       |       |       |
| Total balance (24h)             |       |       |       |       |       |       |       |

1537  
1538  
1539  
1540

## 8. ADJUNCTIVE HYPOXEMIA MANAGEMENT

| MANAGEMENT OF REFRACTORY HYPOXEMIA |                   |            |                |          |                |
|------------------------------------|-------------------|------------|----------------|----------|----------------|
| Prone position (IMV)               | (1. Yes / 0. Not) | Cycle #1   |                | Time     | hours          |
|                                    |                   | Cycle #2   |                | Time     | hours          |
|                                    |                   | Cycle #3   |                | Time     | hours          |
|                                    |                   | Cycle #4   |                | Time     | hours          |
|                                    |                   | Total      |                |          | hours          |
| Neuromuscular blockers             | (1. Yes / 0. Not) | Start date | DD / MM / YYYY | End date | DD / MM / YYYY |
|                                    |                   | Total Days |                |          |                |
| Lung recruitment maneuvers         | (1. Yes / 0. Not) |            |                |          |                |
| ECMO                               | (1. Yes / 0. Not) | Start date | DD / MM / YYYY | End date | DD / MM / YYYY |
|                                    |                   | Total Days |                |          |                |

1541  
1542  
1543  
1544  
1545

## 9. ADVERSE EVENTS

| ADVERSE EVENTS                                 |                   |      |                |
|------------------------------------------------|-------------------|------|----------------|
| Event                                          | (1. Yes / 0. Not) |      |                |
| Cardiac arrest (pre / Post EI)                 |                   | Date | DD / MM / YYYY |
| Supra / ventricular Arrhythmia (pre / post EI) |                   | Date | DD / MM / YYYY |
| Refractory shock (post EI)                     |                   | Date | DD / MM / YYYY |
| Atelectasis                                    |                   | Date | DD / MM / YYYY |
| Death                                          |                   | Date | DD / MM / YYYY |

1546  
1547  
1548

1549  
 1550

**10. OUTCOMES**

| OUTCOMES                          |                         |                         |                   |                               |                   |
|-----------------------------------|-------------------------|-------------------------|-------------------|-------------------------------|-------------------|
| Mechanical ventilation            | (1. Yes / 0. Not)       | RRT                     | (1. Yes / 0. Not) | Tracheostomy                  | (1. Yes / 0. Not) |
| Days free of MV                   |                         | Days free of RRT        |                   |                               |                   |
| ICU length of stay                |                         | Hospital length of stay |                   |                               |                   |
| Hospital survival                 |                         | (1. Yes / 0. Not)       | 28-Day survival   |                               | (1. Yes / 0. Not) |
| Date of positive rtPCR SARS-CoV-2 |                         |                         | DD / MM / YYYY    |                               |                   |
| Probable mechanism of death       | 1. Refractory hypoxemia |                         |                   | 2. Sudden arrhythmia          |                   |
|                                   | 3. Shock                |                         |                   | 4. Multiple organ dysfunction |                   |

1551  
 1552  
 1553  
 1554  
  
 1555  
  
 1556  
  
 1557  
  
 1558  
  
 1559  
  
 1560  
  
 1561  
  
 1562  
  
 1563  
  
 1564  
  
 1565  
  
 1566

1567

1568

1569 **7-CATEGORY ORDINAL SCALE: (\*)**

1570

1571 1. Discharged from the hospital, resuming complete day-life activities

1572 2. Discharged from the hospital, but limitation of activities, home oxygen requirement, or both

1573 3. Hospitalized in general ward (not intensive care unit), not requiring supplemental oxygen  
1574 and no longer requiring ongoing medical care (used if hospitalization was extended for  
1575 infection-control reasons)

1576 4. Hospitalized in general ward (not intensive care unit), requiring supplemental oxygen /  
1577 requiring ongoing medical care (Covid-19-related or other medical conditions);

1578 5. Hospitalized in the intensive care unit, requiring any supplemental oxygen;

1579 6. Hospitalized in the intensive care unit, requiring invasive mechanical ventilation or  
1580 extracorporeal membrane oxygenation (ECMO);

1581 7. Death

1582

1583

1584 \* Wang Y, Fan G, Horby P, et al.

1585 Comparative Outcomes of Adults Hospitalized With Seasonal Influenza A or B Virus

1586 Infection: Application of the 7-Category Ordinal Scale.

1587 Open Forum Infect Dis. 2019 Feb 15;6(3):ofz053. doi: 10.1093/ofid/ofz053.

1588

1589

1590

1591

1592

1593



1594

## 1595 **ANNEX 4. ADVERSE EVENT REPORTING**

1596

### 1597 **ADVERSE EVENT REPORT**

1598

#### 1599 **1. Adverse Event definition (AE)**

1600 Adverse event will be defined as an untoward medical occurrence in a patient or clinical  
1601 investigation subject who received a drug or clinical intervention that does not necessarily  
1602 translates in a causal relationship between such drug or intervention and the outcome. It  
1603 can be either an unfavorable non-intentional sign (including abnormal laboratory results),  
1604 a symptom or a disease presented at the same time the drug or investigation intervention  
1605 is administered.

1606

#### 1607 **Events fulfilling AE definition**

- 1608 • Laboratory test results: Hematology, biochemistry, urine analysis, EKG, radiological  
1609 images, vital signs (including deterioration since admission) among others considered  
1610 of clinical and investigatory relevance by the investigator.
- 1611 • Exacerbation of a pre-existent chronic or intermittent disease. Either increases in  
1612 frequency or increases in affection.
- 1613 • Detection or diagnosis of new medical conditions present prior or subsequent to  
1614 investigation intervention.
- 1615 • Signs, symptoms or clinical sequels, which may be due to drug interaction.
- 1616 • Signs, symptoms or clinical sequels, which may be due to intervention drug overdose,  
1617 or the patient's medication.
- 1618 • In case of AE related drug overdose, both clinical symptoms and abnormal laboratory  
1619 test results must be present. When one of the above is not present, the event is defined  
1620 as "accidental overdose or intentional overdose without adverse event".
- 1621 • Newly diagnosed cancer or a progression in pre-existent cancer.

#### 1622 **Events do not fulfilling AE definition**

- 1623 • Medical or surgical procedure: the event that leads to the procedure is the AE.

- 1624           • Situations where no medical condition is present. Such as hospital admissions for  
1625           social reasons or comfort.
- 1626           • Pre-existent medical conditions detected at admission that do not deteriorate. Or  
1627           expected daily fluctuations in specific diseases.
- 1628           • Ambulatory surgery before the patient’s admission to the study, to treat a pre-existent  
1629           medical condition.

1630

## 1631   **2. Serious Adverse Event Definition (SAE)**

1632           A Serious Adverse Event (SAE) is defined as any unfavorable occurrence independent to  
1633           dosage and leading / related with one of the following:

- 1634           a. Death
- 1635           b. Risk for life
- 1636           c. Requiring either hospital admission or enlarging hospital stay.
- 1637           d. Causing persistent or significant disability or inability. Events of minor clinical  
1638           relevance such as headache, nausea, vomiting, diarrhea, common cold or  
1639           accidental traumatism are not included.
- 1640           e. Congenital abnormalities or birth defects in the patient’s offspring
- 1641           f. Significant life threatening or endangering medical events defined by the principal  
1642           investigator

1643

## 1644   **3. SAE and AE registry**

- 1645           • The investigator must review all documentation related to the adverse event and  
1646           information must be recorded in data collection format.
- 1647           • The investigator must define the diagnosis according to signs, symptoms and  
1648           clinical information. The diagnosis is the adverse event.

1649

## 1650   **4. SAE and AE intensity evaluation**

- 1651           • Grade 1, mild event: mild symptoms that cause minimal or no interference in  
1652           social and functional activities, with no intervention needed
- 1653           • Grade 2, moderate event: moderate symptoms causing more than a minimal  
1654           interference in social and functional activities with intervention requirement.
- 1655           • Grade 3, severe event: severe event causing inability to perform social and  
1656           functional activities with intervention or hospital admission requirement.

1657           • Grade 4, Possible life threatening event: clinical manifestations that can be life  
1658           threatening or that can cause inability to perform basic functional activities. With  
1659           requirement of intervention to prevent permanent failure, disability or death.

1660           • Grade 5, adverse event-related death

1661

1662 **5. Causality evaluation:**

1663           • The investigator must determine the probability of causality between AE and the  
1664           product. Nevertheless, during AE follow-up the investigator can re-evaluate the  
1665           causality.

1666           • The criterion above describes a guideline for causality evaluation:

1667               i. Exposition: a confirmation of exposure of the patient to the product

1668               ii. Temporal evaluation: An existent relation between the AE onset, product  
1669               administration and the effect.

1670               iii. Reasonable and probable. Cause

1671               iv. Withdrawal effect: a resolution or improvement of the AE manifestation  
1672               when withdrawing o reducing dose, exposition or frequency of the  
1673               product.

1674

1675

1676

1677

1678

1679

1680

1681

1682

1683

1684

1685

1686

1687

1688

1689

1690

1691 **Non-Serious Adverse Events / Serious Adverse Events (NSAE / SAE)**

1692

1693

1694

| Adverse Event                                   | Description                                                                                                                                                                       | NSAE* | SAE** | Security Objective |
|-------------------------------------------------|-----------------------------------------------------------------------------------------------------------------------------------------------------------------------------------|-------|-------|--------------------|
| <b>Cardiorespiratory arrest</b>                 | Cardiorespiratory arrest previous or subsequent to intubation. Involving ventricular fibrillation, pulseless ventricular tachycardia, pulseless electrical activity and asystole. |       | X     | X                  |
| <b>Severe supra o ventricular arrhythmias</b>   | Supra or ventricular arrhythmia with pulse. Defined as severe by the induction of deterioration or acute hemodynamic or respiratory decompensation                                |       | X     |                    |
| <b>Non severe supra ventricular arrhythmias</b> | Defined as non-severe if supraventricular arrhythmia is present with no deterioration or acute or respiratory decompensation                                                      | X     |       | X                  |
| <b>Refractory Shock</b>                         | Vasodilatory or cardiogenic shock onset or both, with vasopressor requirement (norepinephrine >0.2 mgr/kg/min and/or vasopressin and/or methylene blue                            |       | X     | X                  |
| <b>Atelectasis</b>                              | Atelectasis confirmed by X-ray.                                                                                                                                                   | X     |       |                    |

1695

1696 **REFERENCES**

1697

- 1698 1. Organization WH. Coronavirus disease 2019 ( COVID-19): situation report, 51. 2020.
- 1699 2. Guan WJ, Ni ZY, Hu Y, Liang WH, Ou CQ, He JX, et al. Clinical Characteristics of Coronavirus  
1700 Disease 2019 in China. N Engl J Med. 2020;382(18):1708-20.
- 1701 3. Team CC-R. Severe Outcomes Among Patients with Coronavirus Disease 2019 (COVID-19) -  
1702 United States, February 12-March 16, 2020. MMWR Morb Mortal Wkly Rep. 2020;69(12):343-6.
- 1703 4. Grasselli G, Zangrillo A, Zanella A, Antonelli M, Cabrini L, Castelli A, et al. Baseline  
1704 Characteristics and Outcomes of 1591 Patients Infected With SARS-CoV-2 Admitted to ICUs of the  
1705 Lombardy Region, Italy. JAMA. 2020.
- 1706 5. Guan WJ, Liang WH, Zhao Y, Liang HR, Chen ZS, Li YM, et al. Comorbidity and its impact on  
1707 1590 patients with COVID-19 in China: a nationwide analysis. Eur Respir J. 2020;55(5).
- 1708 6. Reynolds HR, Adhikari S, Pulgarin C, Troxel AB, Iturrate E, Johnson SB, et al. Renin-  
1709 Angiotensin-Aldosterone System Inhibitors and Risk of Covid-19. N Engl J Med.  
1710 2020;382(25):2441-8.
- 1711 7. Mancía G, Rea F, Ludergnani M, Apolone G, Corrao G. Renin-Angiotensin-Aldosterone  
1712 System Blockers and the Risk of Covid-19. N Engl J Med. 2020;382(25):2431-40.
- 1713 8. Zhou F, Yu T, Du R, Fan G, Liu Y, Liu Z, et al. Clinical course and risk factors for mortality of  
1714 adult inpatients with COVID-19 in Wuhan, China: a retrospective cohort study. Lancet.  
1715 2020;395(10229):1054-62.
- 1716 9. Wu C, Chen X, Cai Y, Xia J, Zhou X, Xu S, et al. Risk Factors Associated With Acute  
1717 Respiratory Distress Syndrome and Death in Patients With Coronavirus Disease 2019 Pneumonia in  
1718 Wuhan, China. JAMA Intern Med. 2020.
- 1719 10. Wu Z, McGoogan JM. Characteristics of and Important Lessons From the Coronavirus  
1720 Disease 2019 (COVID-19) Outbreak in China: Summary of a Report of 72 314 Cases From the  
1721 Chinese Center for Disease Control and Prevention. JAMA. 2020.
- 1722 11. Richardson S, Hirsch JS, Narasimhan M, Crawford JM, McGinn T, Davidson KW, et al.  
1723 Presenting Characteristics, Comorbidities, and Outcomes Among 5700 Patients Hospitalized With  
1724 COVID-19 in the New York City Area. JAMA. 2020.
- 1725 12. Alhazzani W, Møller MH, Arabi YM, Loeb M, Gong MN, Fan E, et al. Surviving Sepsis  
1726 Campaign: guidelines on the management of critically ill adults with Coronavirus Disease 2019  
1727 (COVID-19). Intensive Care Med. 2020.
- 1728 13. Poston JT, Patel BK, Davis AM. Management of Critically Ill Adults With COVID-19. JAMA.  
1729 2020.
- 1730 14. Cao B, Wang Y, Wen D, Liu W, Wang J, Fan G, et al. A Trial of Lopinavir-Ritonavir in Adults  
1731 Hospitalized with Severe Covid-19. N Engl J Med. 2020.
- 1732 15. Beigel JH, Tomashek KM, Dodd LE, Mehta AK, Zingman BS, Kalil AC, et al. Remdesivir for the  
1733 Treatment of Covid-19 - Preliminary Report. N Engl J Med. 2020.

- 1734 16. Geleris J, Sun Y, Platt J, Zucker J, Baldwin M, Hripcsak G, et al. Observational Study of  
1735 Hydroxychloroquine in Hospitalized Patients with Covid-19. *N Engl J Med.* 2020;382(25):2411-8.
- 1736 17. Rosenberg ES, Dufort EM, Udo T, Wilberschied LA, Kumar J, Tesoriero J, et al. Association of  
1737 Treatment With Hydroxychloroquine or Azithromycin With In-Hospital Mortality in Patients With  
1738 COVID-19 in New York State. *JAMA.* 2020.
- 1739 18. Mercurio NJ, Yen CF, Shim DJ, Maher TR, McCoy CM, Zimetbaum PJ, et al. Risk of QT Interval  
1740 Prolongation Associated With Use of Hydroxychloroquine With or Without Concomitant  
1741 Azithromycin Among Hospitalized Patients Testing Positive for Coronavirus Disease 2019 (COVID-  
1742 19). *JAMA Cardiol.* 2020.
- 1743 19. Borba MGS, Val FFA, Sampaio VS, Alexandre MAA, Melo GC, Brito M, et al. Effect of High vs  
1744 Low Doses of Chloroquine Diphosphate as Adjunctive Therapy for Patients Hospitalized With  
1745 Severe Acute Respiratory Syndrome Coronavirus 2 (SARS-CoV-2) Infection: A Randomized Clinical  
1746 Trial. *JAMA Netw Open.* 2020;3(4):e208857.
- 1747 20. Arabi YM, Balkhy HH, Hayden FG, Bouchama A, Luke T, Baillie JK, et al. Middle East  
1748 Respiratory Syndrome. *N Engl J Med.* 2017;376(6):584-94.
- 1749 21. Peiris JS, Yuen KY, Osterhaus AD, Stöhr K. The severe acute respiratory syndrome. *N Engl J*  
1750 *Med.* 2003;349(25):2431-41.
- 1751 22. Zhao Z, Zhang F, Xu M, Huang K, Zhong W, Cai W, et al. Description and clinical treatment of  
1752 an early outbreak of severe acute respiratory syndrome (SARS) in Guangzhou, PR China. *J Med*  
1753 *Microbiol.* 2003;52(Pt 8):715-20.
- 1754 23. Zhong NS, Zheng BJ, Li YM, Poon, Xie ZH, Chan KH, et al. Epidemiology and cause of severe  
1755 acute respiratory syndrome (SARS) in Guangdong, People's Republic of China, in February, 2003.  
1756 *Lancet.* 2003;362(9393):1353-8.
- 1757 24. Zhu N, Zhang D, Wang W, Li X, Yang B, Song J, et al. A Novel Coronavirus from Patients with  
1758 Pneumonia in China, 2019. *N Engl J Med.* 2020;382(8):727-33.
- 1759 25. Zhou P, Yang XL, Wang XG, Hu B, Zhang L, Zhang W, et al. A pneumonia outbreak associated  
1760 with a new coronavirus of probable bat origin. *Nature.* 2020;579(7798):270-3.
- 1761 26. Li Q, Guan X, Wu P, Wang X, Zhou L, Tong Y, et al. Early Transmission Dynamics in Wuhan,  
1762 China, of Novel Coronavirus-Infected Pneumonia. *N Engl J Med.* 2020;382(13):1199-207.
- 1763 27. Chan JF, Yuan S, Kok KH, To KK, Chu H, Yang J, et al. A familial cluster of pneumonia  
1764 associated with the 2019 novel coronavirus indicating person-to-person transmission: a study of a  
1765 family cluster. *Lancet.* 2020;395(10223):514-23.
- 1766 28. Arons MM, Hatfield KM, Reddy SC, Kimball A, James A, Jacobs JR, et al. Presymptomatic  
1767 SARS-CoV-2 Infections and Transmission in a Skilled Nursing Facility. *N Engl J Med.*  
1768 2020;382(22):2081-90.
- 1769 29. Siddiqi HK, Mehra MR. COVID-19 Illness in Native and Immunosuppressed States: A  
1770 Clinical-Therapeutic Staging Proposal. *The Journal of Heart and Lung Transplantation.*
- 1771 30. Pham T, Brochard LJ, Slutsky AS. Mechanical Ventilation: State of the Art. *Mayo Clin Proc.*  
1772 2017;92(9):1382-400.

- 1773 31. Esteban A, Frutos-Vivar F, Muriel A, Ferguson ND, Peñuelas O, Abaira V, et al. Evolution of  
1774 mortality over time in patients receiving mechanical ventilation. *Am J Respir Crit Care Med.*  
1775 2013;188(2):220-30.
- 1776 32. Zhang Y, Fang C, Dong BR, Wu T, Deng JL. Oxygen therapy for pneumonia in adults.  
1777 *Cochrane Database Syst Rev.* 2012(3):CD006607.
- 1778 33. Xu XP, Zhang XC, Hu SL, Xu JY, Xie JF, Liu SQ, et al. Noninvasive Ventilation in Acute  
1779 Hypoxic Nonhypercapnic Respiratory Failure: A Systematic Review and Meta-Analysis. *Crit Care*  
1780 *Med.* 2017;45(7):e727-e33.
- 1781 34. Nishimura M. High-Flow Nasal Cannula Oxygen Therapy in Adults: Physiological Benefits,  
1782 Indication, Clinical Benefits, and Adverse Effects. *Respir Care.* 2016;61(4):529-41.
- 1783 35. Rochweg B, Granton D, Wang DX, Helviz Y, Einav S, Frat JP, et al. High flow nasal cannula  
1784 compared with conventional oxygen therapy for acute hypoxemic respiratory failure: a systematic  
1785 review and meta-analysis. *Intensive Care Med.* 2019;45(5):563-72.
- 1786 36. Azoulay E, Lemiale V, Mokart D, Nseir S, Argaud L, Pène F, et al. Effect of High-Flow Nasal  
1787 Oxygen vs Standard Oxygen on 28-Day Mortality in Immunocompromised Patients With Acute  
1788 Respiratory Failure: The HIGH Randomized Clinical Trial. *JAMA.* 2018;320(20):2099-107.
- 1789 37. Frat JP, Thille AW, Mercat A, Girault C, Ragot S, Perbet S, et al. High-flow oxygen through  
1790 nasal cannula in acute hypoxemic respiratory failure. *N Engl J Med.* 2015;372(23):2185-96.
- 1791 38. Lemiale V, Mokart D, Mayaux J, Lambert J, Rabbat A, Demoule A, et al. The effects of a 2-h  
1792 trial of high-flow oxygen by nasal cannula versus Venturi mask in immunocompromised patients  
1793 with hypoxemic acute respiratory failure: a multicenter randomized trial. *Crit Care.* 2015;19:380.
- 1794 39. Parke RL, McGuinness SP, Eccleston ML. A preliminary randomized controlled trial to  
1795 assess effectiveness of nasal high-flow oxygen in intensive care patients. *Respir Care.*  
1796 2011;56(3):265-70.
- 1797 40. Schwabbauer N, Berg B, Blumenstock G, Haap M, Hetzel J, Riessen R. Nasal high-flow  
1798 oxygen therapy in patients with hypoxic respiratory failure: effect on functional and subjective  
1799 respiratory parameters compared to conventional oxygen therapy and non-invasive ventilation  
1800 (NIV). *BMC Anesthesiol.* 2014;14:66.
- 1801 41. Bell N, Hutchinson CL, Green TC, Rogan E, Bein KJ, Dinh MM. Randomised control trial of  
1802 humidified high flow nasal cannulae versus standard oxygen in the emergency department. *Emerg*  
1803 *Med Australas.* 2015;27(6):537-41.
- 1804 42. Jones PG, Kamona S, Doran O, Sawtell F, Wilsher M. Randomized Controlled Trial of  
1805 Humidified High-Flow Nasal Oxygen for Acute Respiratory Distress in the Emergency Department:  
1806 The HOT-ER Study. *Respir Care.* 2016;61(3):291-9.
- 1807 43. Makdee O, Monsomboon A, Surabenjawong U, Praphruetkit N, Chaisirin W, Chakorn T, et al.  
1808 High-Flow Nasal Cannula Versus Conventional Oxygen Therapy in Emergency Department Patients  
1809 With Cardiogenic Pulmonary Edema: A Randomized Controlled Trial. *Ann Emerg Med.*  
1810 2017;70(4):465-72.e2.
- 1811 44. Rittayamai N, Tscheikuna J, Praphruetkit N, Kijpinyochai S. Use of High-Flow Nasal Cannula  
1812 for Acute Dyspnea and Hypoxemia in the Emergency Department. *Respir Care.* 2015;60(10):1377-  
1813 82.

- 1814 45. Society RccoCT. [Expert consensus on preventing nosocomial transmission during  
1815 respiratory care for critically ill patients infected by 2019 novel coronavirus pneumonia]. Zhonghua  
1816 Jie He He Hu Xi Za Zhi. 2020;17(0):E020.
- 1817 46. Warrillow S, Austin D, Cheung W, Close E, Holley A, Horgan B, et al. ANZICS guiding  
1818 principles for complex decision making during the COVID-19 pandemic. Crit Care Resusc. 2020.
- 1819 47. Winck JC, Ambrosino N. COVID-19 pandemic and non invasive respiratory management:  
1820 Every Goliath needs a David. An evidence based evaluation of problems. Pulmonology. 2020.
- 1821 48. Wang K, Zhao W, Li J, Shu W, Duan J. The experience of high-flow nasal cannula in  
1822 hospitalized patients with 2019 novel coronavirus-infected pneumonia in two hospitals of  
1823 Chongqing, China. Ann Intensive Care. 2020;10(1):37.
- 1824 49. Hui DS, Chow BK, Lo T, Tsang OTY, Ko FW, Ng SS, et al. Exhaled air dispersion during high-  
1825 flow nasal cannula therapy. Eur Respir J. 2019;53(4).
- 1826 50. Leung CCH, Joynt GM, Gomersall CD, Wong WT, Lee A, Ling L, et al. Comparison of high-flow  
1827 nasal cannula versus oxygen face mask for environmental bacterial contamination in critically ill  
1828 pneumonia patients: a randomized controlled crossover trial. J Hosp Infect. 2019;101(1):84-7.
- 1829 51. Lu X, Xu S. Therapeutic effect of high-flow nasal cannula on severe COVID-19 patients in a  
1830 makeshift intensive-care unit: A case report. Medicine (Baltimore). 2020;99(21):e20393.
- 1831 52. Karamouzos V, Fligou F, Gogos C, Velissaris D. High flow nasal cannula oxygen therapy in  
1832 adults with COVID-19 respiratory failure. A case report. Monaldi Arch Chest Dis. 2020;90(2).
- 1833 53. Ospina-Tascón GA, Teboul JL, Hernandez G, Alvarez I, Sánchez-Ortiz AI, Calderón-Tapia LE,  
1834 et al. Diastolic shock index and clinical outcomes in patients with septic shock. Ann Intensive Care.  
1835 2020;10(1):41.
- 1836 54. Hernández G, Ospina-Tascón GA, Damiani LP, Estenssoro E, Dubin A, Hurtado J, et al. Effect  
1837 of a Resuscitation Strategy Targeting Peripheral Perfusion Status vs Serum Lactate Levels on 28-  
1838 Day Mortality Among Patients With Septic Shock: The ANDROMEDA-SHOCK Randomized Clinical  
1839 Trial. JAMA. 2019;321(7):654-64.
- 1840
- 1841
- 1842
- 1843
- 1844
- 1845
- 1846
- 1847
- 1848
- 1849
- 1850
- 1851
- 1852
- 1853
- 1854
- 1855



1856

1857

1858        **HIGH-FLOW vs. CONVENTIONAL OXYGEN THERAPY IN**  
1859        **PATIENTS WITH ACUTE RESPIRATORY FAILURE DUE TO**  
1860        **SARS-CoV-2: The HiFlo-COVID RANDOMIZED CLINICAL**  
1861        **TRIAL**

1862

1863

1864                                **The HiFlo-COVID collaborative group**

1865

1866

1867

1868

1869                                **SUMMARY OF CHANGES**

1870

1871

1872

1873

1874

1875

1876

1877

1878

1879

1880

1881

1882 **Versions and dates**

1883

---

1884 Protocol version 1.0

1885 Version date: 16th July, 2020

1886 Refers to Statistical Analysis Plan (SAP) Version 1.0

1887

---

1888 Protocol version 2.0 (amendment 2.0)

1889 Version date: 16th September, 2020

1890

---

1891 Protocol version 3.0 (amendment 2.0)

1892 Version date: 02nd January, 2021

1893 Refers to Statistical Analysis Plan (SAP) Version 3.0

1894

---

1895

| <b>Amendment 1.0</b>                         | <b>Version 2.0; 16<sup>th</sup> September, 2.020</b>                                                                                                                                                                                                                                                                             |
|----------------------------------------------|----------------------------------------------------------------------------------------------------------------------------------------------------------------------------------------------------------------------------------------------------------------------------------------------------------------------------------|
| 9.6 Sample Size                              | Actual sample size has been estimated in 196 participants (98 by arm) aiming to demonstrate a reduction in the need for intubation from 60 to 40%, assuming an alpha error of 0.05 and power of 0.80. Nevertheless, anticipating some follow-up losses, the new proposed sample size will be 200 patients (i.e., 2 more by arm). |
| 11.3 Blood Sampling and Cytokine Measurement | Blood sampling will be performed in selected centers until the final sample size is completed. Each center will be committed to storage and safeguard such blood samples. Once the size sample is completed, blood samples will be sent to the Fundación Valle del Lili, Cali - Colombia in order to proceed to the prespecified |

|                                        |                                                                                                                                                                                                                                                                                                                                                                                                                                                                                                                                                                                                                             |
|----------------------------------------|-----------------------------------------------------------------------------------------------------------------------------------------------------------------------------------------------------------------------------------------------------------------------------------------------------------------------------------------------------------------------------------------------------------------------------------------------------------------------------------------------------------------------------------------------------------------------------------------------------------------------------|
|                                        | cytokine measurement.                                                                                                                                                                                                                                                                                                                                                                                                                                                                                                                                                                                                       |
| 11.4. Study Completion                 | <p>Some clarifying paragraphs on the follow-up until day-28:</p> <ul style="list-style-type: none"> <li>• Withdraw from study due to voluntary or administrative reasons. Under such circumstances, the participant will be excluded from analysis and his/her data will not be analyzed for primary and secondary outcomes, unless the participant had completed criteria to stop oxygen supply</li> <li>• Hospital discharge because satisfactory condition. In such case, a structured telephone call will be performed at day 28 to confirm his/her clinical condition between hospital discharge and day 28</li> </ul> |
| 11.6 Follow-Up Schedule                | A structured telephone call performed at day 28 is added                                                                                                                                                                                                                                                                                                                                                                                                                                                                                                                                                                    |
| Serious and Non-Serious Adverse Events | <ul style="list-style-type: none"> <li>• The adverse events: bacterial pneumonia, bacteremia and fungal bloodstream dissemination, primarily defined as security outcomes, will be henceforth reported to the Ethical Committee as serious adverse events</li> <li>• All serious and non-serious adverse events related with intubation (pre and post procedure) will be henceforth reported to the Ethical Committee as serious adverse events</li> </ul>                                                                                                                                                                  |

1896

|                      |                                                                                                                                                                                                                                                                                                                                                                                                                                                                                                                                                                                                                                                                                                                       |
|----------------------|-----------------------------------------------------------------------------------------------------------------------------------------------------------------------------------------------------------------------------------------------------------------------------------------------------------------------------------------------------------------------------------------------------------------------------------------------------------------------------------------------------------------------------------------------------------------------------------------------------------------------------------------------------------------------------------------------------------------------|
| <b>Amendment 2.0</b> | <b>Version 3.0; 02<sup>nd</sup> January, 2.021</b>                                                                                                                                                                                                                                                                                                                                                                                                                                                                                                                                                                                                                                                                    |
| 9.6 Sample Size      | <p>In the amendment 1.0, sample size had been increased to 200 patients (i.e., 2 more by arm) aiming to compensate a potential 2% of losses. Nevertheless, due to the particular situation during pandemic, an important number of participants (n=18, representing the 9.2% of the total sample size) had been transferred to other hospitals within 72 hours from randomization at the time in which this amendment was constructed. After an extensive discussion with the Ethical Committee and trying to favor the possibility that results of this trial keep sufficient power and consequently, more reliable results, the number total of randomized patients is newly adjusted up to complete a total of</p> |

|               |                                                                                                                                                                                                                               |
|---------------|-------------------------------------------------------------------------------------------------------------------------------------------------------------------------------------------------------------------------------|
|               | 220 participants.                                                                                                                                                                                                             |
| 6. Objectives | Primary and secondary objectives were preserved as initially conceived. Nevertheless, for a better understanding, objectives for secondary and tertiary outcomes, and for predefined subgroup analysis were listed separately |
| 7. Hypotheses | Hypotheses for primary and secondary outcomes and for subgroups analysis were listed accordingly                                                                                                                              |
| 8. Outcomes   | Primary and secondary outcomes were preserved as initially conceived. Nevertheless, for a better understanding, secondary and tertiary outcomes were listed separately as well as the predefined subgroup analysis.           |

1897
