# Supplementary material
Source: PubMed Central journal article supplement (PMC8652598)
Supplement: jama-e2120714-s002.pdf [file jama-e2120714-s002.pdf]

# Statistical Analysis Plan

## (SAP)

### **HIGH-FLOW vs. CONVENTIONAL OXYGEN THERAPY IN PATIENTS WITH ACUTE RESPIRATORY FAILURE DUE TO SARS-CoV-2: The HiFlo-COVID RANDOMIZED CLINICAL TRIAL**

#### **The HiFlo-COVID collaborative group**

This document includes:

- Statistical Analysis Plan (SAP) VERSION 2.0 (corresponding to the Protocol Version 3.0). Date: 02nd January 2021.

Approved by: Ethical and Biomedical Research Committee (EBRC) from the Fundación Valle del Lili, Cali, Colombia

- Summary of Changes to the SAP

•

23

# **Statistical Analysis Plan**

24

## **(SAP)**

25

26 **HIGH-FLOW vs. CONVENTIONAL OXYGEN THERAPY IN PATIENTS WITH ACUTE**  
27 **RESPIRATORY FAILURE DUE TO SARS-CoV-2: The HiFlo-COVID RANDOMIZED**  
28 **CLINICAL TRIAL**

29

30

31 **The HiFlo-COVID collaborative group**

32

33

34 Department of Intensive Care, Fundación Valle del Lili, Cali Colombia.

35 Department of Internal Medicine, Division of Infectology. Fundación Valle del Lili Cali Colombia.

36

Universidad Icesi. Cali Colombia.

37

38

39 **VERSION 2.0 (Refers to Protocol Version 3.0)**

40

02nd January 2.021

41

42

43

44 **FUNDACION VALLE DEL LILI – UNIVERSIDAD ICESI**

45

**CALI COLOMBIA**

46

47 **TABLE OF CONTENT**

48

49 **1 INTRODUCTION** **4**

50 **2 STUDY DESIGN / INTERVENTIONS** **4**

51 **3 STUDY MAIN OBJECTIVE** **4**

52 **4 OUTCOMES** **5**

53 **4.1 Co-PRIMARY OUTCOMES** **5**

54 **4.2. SECONDARY - TERTIARY OUTCOMES AND PRESPECIFIED SUBGROUP ANALYSIS** **5**

55 **5 STUDY POPULATION** **6**

56 **5.1. INCLUSION CRITERIA** **6**

57 **5.2. EXCLUSION CRITERIA** **7**

58 **6 SAMPLE SIZE CALCULATION** **8**

59 **7 TYPE OF ANALYSIS** **8**

60 **7.1. PRIMARY OUTCOME ANALYSIS** **9**

61 **7.2. SECONDARY OUTCOMES, TERCIARY OUTCOMES, AND PREDEFINED SUBGROUPS ANALYSIS** **10**

62 **7.3. ADDITIONAL ANALYSIS (POST-HOC ANALYSIS)** **13**

63 **7.4. HANDLING MISSING DATA** **14**

64 **8 INTERIM ANALYSIS** **14**

65 **9 TABLES** **15**

66 **9.4 TABLE 3. TIME FROM RANDOMIZATION TO INTUBATION / INVASIVE MECHANICAL VENTILATION**  
67 **SUPPORT / ADDITIONAL RESPIRATORY SUPPORT MANEUVERS** **23**

68 **REFERENCES** **24**

69 **SUMMARY OF CHANGES** **25**

70

71

72

73

74 **1 INTRODUCTION**

75 Arterial hypoxemia is the leading feature of severe cases of Covid-19. In general,  
76 management of hypoxemic respiratory failure relies on oxygen supplementation  
77 aiming to improve oxygenation and to support respiratory effort.

78 High-flow oxygen therapy through a nasal cannula is a technique whereby a mixture  
79 of heated and humidified oxygen and air are delivered to the nose at high flow rates.  
80 Data suggest that high flow oxygen through a nasal cannula might decrease the need  
81 for tracheal intubation and might reduce the risk of escalation of oxygen therapy in  
82 patients with acute respiratory hypoxemic failure, with no apparent impact on  
83 mortality rates. Nevertheless, there is no information about if such data are applicable  
84 to Covid-19. Accordingly, we conducted a trial to assess the impact of high-flow  
85 oxygen therapy through a nasal cannula vs. conventional oxygen therapy on the need  
86 for intubation and the time to clinical recovery in patients with severe Covid-19.

87

88 **2 STUDY DESIGN / INTERVENTIONS**

89 Open (non-blind), randomized, controlled, Phase IIb clinical trial including adults with  
90 acute respiratory failure and partial pressure of arterial oxygen to fraction of inspired  
91 oxygen ( $PaO_2/FiO_2$ ) ratio < 200 due to suspected or confirmed infection by SARS-CoV-  
92 2. Patients will be randomly allocated to high-flow oxygen through a nasal cannula vs.  
93 conventional oxygen therapy within the 6 hours of fulfilling acute respiratory failure  
94 and prespecified hypoxemia threshold.

95

96 **3 STUDY MAIN OBJECTIVE**

97 To evaluate the impact of using high-flow oxygen through a nasal cannula vs.  
98 conventional oxygen therapy on the need for intubation/support with invasive  
99 mechanical ventilation and clinical status as assessed by a 7-category ordinal scale in  
100 patients with acute hypoxemic respiratory failure secondary to severe Covid-19.

101

102

## 103 4 OUTCOMES

### 104 4.1 Co-Primary Outcomes

105 • Need for intubation / invasive mechanical ventilation support (time frame:  
106 28 days).

107 • Time to clinical recovery as assessed by a 7-category ordinal scale (time  
108 frame: 28 days).

109

### 110 4.2. Secondary - tertiary outcomes and Prespecified Subgroup Analysis

111

#### 112 Secondary Outcomes

113 Efficiency

114 • Early requirement of intubation / invasive mechanical ventilation support  
115 (time frame: 7 days – 14 days).

116 • Mechanical ventilation-free days (time frame: 28 days).

117 • Renal replacement therapy-free days (time frame: 28 days)

118 • Length of ICU stay (time frame: 28 days)

119 • Length of hospital stay (time frame: 28 days)

120 • Hospital mortality – all causes (time frame: 14 and 28 days)

121 Safety

122 • Occurrence / proportion of patients with serious adverse events (time frame:  
123 28 days)

124 • Occurrence / proportion of bacterial - fungal infections (time frame: 28 days).

125

#### 126 Tertiary Outcomes

127 • Time-course of oxygen flow and PaO<sub>2</sub>/FiO<sub>2</sub> ratio among the groups under  
128 study (time frame: 7 days)

- 129 • Time elapsed from randomization to intubation / invasive mechanical  
130 ventilation support in patients failing to high-flow oxygen therapy and  
131 conventional oxygen therapy (time frame: 28 days).  
132 • Clinical condition at day-28 (time frame: 28 days).  
133 • Evolvment of multiorgan dysfunction as assessed by SOFA score (time frame:  
134 14 days)  
135 • Evolvment of extra-pulmonary organ dysfunction as assessed by extra-  
136 pulmonary SOFA score (time frame: 14 days).  
137 • HACOR and ROX scores at 2- and 4-hours post-randomization and their  
138 relation with requirement of intubation (time frame: 28 days)  
139 • Differences in time-course of IL-6 and IL-8 between study groups (time frame:  
140 7 days)  
141 • Differences in time-course of ferritin, LDH, leukocyte count, neutrophil to  
142 lymphocyte count relationship, platelet count, and D-dimer among the groups  
143 under study (time frame: 7 days)  
144 •  
145

146 Subgroup Analysis

- 147 • Time to intubation / invasive mechanical ventilation and clinical recovery in  
148 subgroups with baseline PaO<sub>2</sub>/FiO<sub>2</sub> > and < 100 mmHg (time frame: 28 days)  
149 • Time to intubation / invasive mechanical ventilation and clinical recovery in  
150 subgroups with baseline IL-6 > and < 100 pg/mL (time frame: 28 days)  
151 • Time to intubation / invasive mechanical ventilation and clinical recovery in  
152 subgroups aged > and < 60 years (time frame: 28 days)

153

154 **5 Study Population**

155

156 **5.1. Inclusion criteria**

- 157 • Age 18 years or older;  
158 • Suspected or confirmed infection by SARS-CoV-2;  
159 • Acute respiratory distress with a ratio of the partial pressure of arterial oxygen  
160 to the fraction of inspired oxygen (PaO<sub>2</sub>/FiO<sub>2</sub>) < 200;

- 161       • Clinical signs of respiratory failure: laborious breathing, use of accessory  
162       muscles and respiratory rate greater than 25/min;  
163       • Less than 6 hours from fulfilling the criteria of acute respiratory failure;  
164       • Having a progression < 6 hours since fulfilling definition of moderate or severe  
165       acute respiratory failure due to suspected or confirmed SARS-CoV-2 infection.

166

## 167   **5.2. Exclusion criteria**

- 168       • < 18 years.  
169       • Indication for immediate tracheal intubation.  
170       • Pregnant woman / positive pregnancy test at the time of potential inclusion.  
171       • Chronic liver disease / liver cirrhosis Child-Pugh C.  
172       • Confirmation of active bacterial or fungal infection.  
173       • Uncontrolled HIV/AIDS disease (defined by presence of viral load > 200  
174       copies/mL).  
175       • Previous history of COPD Gold C – D.  
176       • History of COPD requiring hospitalization or ICU admission during the last  
177       year.  
178       • History of congestive heart failure NYHA III – IV.  
179       • History or actual left ventricular ejection fraction < 45%  
180       • Highly suspected or confirmed cardiogenic pulmonary edema.  
181       • Hypercapnic respiratory failure (PaCO<sub>2</sub> > 55 mmHg).  
182       • History or high suspicion of central or peripheral demyelinating disorders at  
183       the time of potential inclusion.  
184       • Imminence of death within the next 24 hours (according to investigator's  
185       clinical judgment)  
186       • Any serious medical condition or clinical laboratory test abnormality that, at  
187       the investigator's judgment, prevents safe patient participation and completion  
188       of the study.  
189       • Participation in another clinical trial (except other related to SARS-CoV-2.  
190       These criteria will be always discussed among steering committee members

191

## 192 6 Sample Size Calculation

193 Sample size was calculated under the assumption of an intubation rate of 60%,  
194 according to the data obtained from the first 75 patients with Covid-19-related  
195 moderate and severe hypoxemic respiratory failure treated in the coordinating center.  
196 Such proportion of intubation events was in agreement with previous data from a  
197 randomized controlled trial testing high-flow oxygen through nasal cannula in a mixed  
198 population of patients with acute hypoxemic respiratory failure (1). In such a trial, the  
199 maximal value of the 95% confidence interval for intubation at day 28 in the groups  
200 subjected to standard oxygen therapy and non-invasive mechanical ventilation were  
201 57% and 59% independently of basal oxygenation, and 64% and 68% for those with  
202 an initial PaO<sub>2</sub>/FiO<sub>2</sub> ratio < 200. Consequently, estimating an intubation rate around  
203 60% in conventionally-treated patients, we calculated that enrollment of 196 patients  
204 would be necessary to demonstrate an absolute reduction of 20% in the proportion of  
205 intubation and requirement of invasive mechanical ventilation with an 80% power  
206 and two-side alpha level of 0.05. In addition, data obtained from the initial cohort of  
207 patients with Covid-19-related severe hypoxemic respiratory failure treated in the  
208 coordinating center revealed a time to recovery of 14 (± 4.5) vs. 12 (± 4.0) days for the  
209 conventional oxygen and high-flow oxygen therapy groups respectively. Thus, it was  
210 estimated that 160 patients (80 by arm) would be necessary to demonstrate such a  
211 difference with an 80% power and two-side alpha level of 0.05. Consequently, the  
212 sample size of 196 patients was retained as the sample size target.

213 Nevertheless, due to the particular situation during pandemic, an important number  
214 of participants (n=18, representing the 9.2% of the total sample size) were  
215 transferred to other hospitals within 72 hours from randomization at the time in  
216 which the HiFlo-Covid protocol amendment 2.0 was constructed. After an extensive  
217 discussion with the Ethical Committee and trying to favor the possibility that results  
218 of this trial keep sufficient power and consequently, more reliable results, the number  
219 total of randomized patients is newly adjusted up to complete a total of 220  
220 participants.

221

## 222 7 Type of analysis

223 Main analysis will be performed on an intention-to-treat basis with no exclusion after  
224 randomization except exclusions for withdrawn consent, according to the local  
225 regulations. Baseline characteristics will be displayed as the shown Table 1.



226

## 227 **7.1. Primary Outcome Analysis**

228 The first primary outcome is to evaluate the effect of high-flow oxygen through a nasal  
229 cannula on the requirement of intubation and invasive mechanical ventilation within  
230 28-days from randomization. The effect of the allocated treatment (high-flow oxygen  
231 vs. conventional oxygen therapy) on the cumulative incidence of intubation / invasive  
232 mechanical ventilation will be calculated with a Cox proportional hazard model with  
233 stratification by age (< or ≥ 60 years old), initial hypoxemia severity (PaO<sub>2</sub>/FiO<sub>2</sub> ratio  
234 as continuous variable), and comorbidities (a composite of arterial hypertension,  
235 diabetes, obesity [body mass index > 30], chronic obstructive pulmonary disease, end-  
236 stage renal failure, heart failure, cirrhosis Child-Pugh A-B). The proportional hazards  
237 assumption will be tested with the Grambsch and Therneau method (2). Results will  
238 be reported as hazard ratios with 95% confidence intervals and represented in  
239 Kaplan-Meier curves.

240 The other primary outcome is the clinical improvement within 28 days from  
241 randomization. Time to clinical improvement is defined as the time elapsed from  
242 randomization until the first day, during the 28 days after enrollment, on which a  
243 patient attained a reduction in two or more points in the modified ordinal 7-category  
244 scale. The effect size of the allocated therapy treatment (high-flow oxygen vs.  
245 conventional oxygen therapy) on the time to recovery will be assessed by computing  
246 the hazard ratio with its 95% confidence interval (CI) as estimated from Cox  
247 proportional hazard model adjusted by age (< or ≥ 60 years old), initial hypoxemia  
248 severity (PaO<sub>2</sub>/FiO<sub>2</sub> ratio as continuous variable), and comorbidities (a composite of  
249 arterial hypertension, diabetes, obesity [body mass index > 30], chronic obstructive  
250 pulmonary disease, end-stage renal failure, heart failure, cirrhosis Child-Pugh A-B).  
251 Such analysis will be constructed for the overall population and also stratified  
252 according to baseline 7-category ordinal scale at enrollment (i.e., scores of 4 or 5), and  
253 plotted in Kaplan-Meier curves.

254 Hazard ratios calculated for the outcome clinical recovery greater than 1, will indicate  
255 benefit with the high-flow oxygen therapy. Meanwhile, hazard ratios calculated for  
256 need for intubation less than 1 will indicate benefit with the use of high-flow oxygen  
257 therapy.

258

259

## 260 7.2. Secondary outcomes, tertiary outcomes, and predefined subgroups analysis

261

262 Continuous variables will be described as medians (interquartile ranges) and  
263 categorical variables as proportions.

264

### 265 Secondary Outcomes analysis

266 • Proportion of patients requiring early intubation and mechanical ventilation  
267 support: defined as the proportion of patients requiring intubation for mechanical  
268 ventilatory support by days 7 and 14. Differences between groups will be  
269 compared by using a Mann Whitney test.

270 • Mechanical ventilation free-days within 28 days: defined as the number of days  
271 from day 2 up to 28 days after randomization in which the patients remained  
272 without mechanical ventilation support. A Proportional odds model adjusted for  
273 age ( $\geq$  or  $<$  60 years old), PaO<sub>2</sub>/FiO<sub>2</sub> ratio at the randomization, and comorbidities  
274 (a composite of arterial hypertension, diabetes, obesity [body mass index  $>$  30],  
275 chronic obstructive pulmonary disease, end-stage renal failure, heart failure,  
276 cirrhosis Child-Pugh A-B) will be used to determine differences between groups.  
277 Odds ratios  $>$  1 will indicate benefit with the use of High-Flow Oxygen Therapy and  
278 vice versa.

279 • Renal replacement therapy-free days: defined as the number of days from day 2 up  
280 to 28 days after randomization in which the patients remained without renal  
281 replacement support. A Proportional odds model adjusted for age ( $\geq$  or  $<$  60 years  
282 old), PaO<sub>2</sub>/FiO<sub>2</sub> ratio at the randomization, and comorbidities (a composite of  
283 arterial hypertension, diabetes, obesity [body mass index  $>$  30], chronic obstructive  
284 pulmonary disease, end-stage renal failure, heart failure, cirrhosis Child-Pugh A-B)  
285 will be used to determine differences between groups. Odds ratios  $>$  1 will indicate  
286 benefit with the use of High-Flow Oxygen Therapy and vice versa.

287 • Hospital length of stay: number of days in which the patient remained hospitalized.  
288 A Proportional odds model adjusted for age ( $\geq$  or  $<$  60 years old), PaO<sub>2</sub>/FiO<sub>2</sub> ratio at  
289 the randomization, and comorbidities (a composite of arterial hypertension,  
290 diabetes, obesity [body mass index  $>$  30], chronic obstructive pulmonary disease,  
291 end-stage renal failure, heart failure, cirrhosis Child-Pugh A-B) will be used to  
292 determine differences between groups. Odds ratios  $>$  1 will indicate benefit with  
293 the use of High-Flow Oxygen Therapy and vice versa.

294 • Hospital length of ICU stay: number of days in which the patient remained  
295 hospitalized in the Intensive Care Unit. A Proportional odds model adjusted for age

- 296 ( $\geq$  or  $<$  60 years old), PaO<sub>2</sub>/FiO<sub>2</sub> ratio at the randomization, and comorbidities (a  
297 composite of arterial hypertension, diabetes, obesity [body mass index  $>$  30],  
298 chronic obstructive pulmonary disease, end-stage renal failure, heart failure,  
299 cirrhosis Child-Pugh A-B) will be used to determine differences between groups.  
300 Odds ratios  $>$  1 will indicate benefit with the use of High-Flow Oxygen Therapy and  
301 vice versa.
- 302 • Mortality at days- 14 and 28: defined as mortality within the 14 and 28 days from  
303 randomization. A Proportional odds model adjusted for age ( $\geq$  or  $<$  60 years old),  
304 PaO<sub>2</sub>/FiO<sub>2</sub> ratio at the randomization, and comorbidities (a composite of arterial  
305 hypertension, diabetes, obesity [body mass index  $>$  30], chronic obstructive  
306 pulmonary disease, end-stage renal failure, heart failure, cirrhosis Child-Pugh A-B)  
307 will be used to determine differences between groups. Odds ratios  $<$  1 will indicate  
308 benefit with the use of High-Flow Oxygen Therapy and vice versa.
  - 309 • Proportion of major events: defined as the proportion of patients developing some  
310 defined major adverse event. Differences between groups will be compared by  
311 using a Mann Whitney test

### 312 Tertiary Outcomes analysis

- 313 • Time-course of oxygen flow and PaO<sub>2</sub>/FiO<sub>2</sub> ratio among the groups under study.  
314 Differences between groups will be estimated by using a mixed linear regression  
315 considering patient as random effect and adjusting for baseline value of the  
316 variable.
- 317 • Time elapsed from randomization to intubation / invasive mechanical ventilation  
318 support: defined by the number of hours between randomization up to intubation  
319 (when required). Differences between groups will be compared by using a Mann  
320 Whitney test
- 321 • Clinical condition at day-28 according to 7-category ordinal scale: defined as the  
322 patient clinical condition at day-28 after randomization according to such scale.  
323 Differences between groups will be compared by using a Mann Whitney test
- 324 • Multiple organ dysfunction during the first 7 and 14-days: time-course of  
325 multiorgan dysfunction as assessed by the Sequential Organ Failure Assessment  
326 Score (SOFA) score (3). Differences between groups will be estimated by using a  
327 mixed linear regression considering patient as random effect and adjusting for  
328 baseline value of the variable.
- 329 • Extra-pulmonary organ dysfunction during the first 7 and 14-days: time-course of  
330 extra pulmonary organ dysfunction as assessed by the Sequential Organ Failure  
331 Assessment Score (SOFA) score (3), but excluding the corresponding pulmonary  
332 points. Differences between groups will be estimated by using a mixed linear

- 333 regression considering patient as random effect and adjusting for baseline value of  
334 the variable.
- 335 • HACOR and ROX scores at 2- and 4-hours post-randomization and their relation  
336 with requirement of intubation (time frame: 28 days)
  - 337 • Time-course of IL-6 and IL-8 between study groups (time frame: 14 days): defined  
338 as the evolvment in time of IL-6 and IL-8 levels within the first 14 days from  
339 randomization. Differences between groups will be estimated by using a mixed  
340 linear regression considering patient as random effect and adjusting for baseline  
341 value of each variable.
  - 342 • Time-course of ferritin, LDH, leukocyte count, neutrophil/lymphocyte count  
343 relationship, platelet count, and D-dimer among the groups under study (time  
344 frame: 14 days): defined as the evolvment in time of such markers within the first  
345 14 days from randomization. Differences between groups will be estimated by  
346 using a mixed linear regression considering patient as random effect and adjusting  
347 for baseline value of each variable.

348

349 Predefined subgroups analysis

- 350 • Requirement of intubation / invasive mechanical ventilation in subgroups with  
351 baseline PaO<sub>2</sub>/FiO<sub>2</sub> > and < 100 mmHg (time frame: 28 days). Differences between  
352 groups will be compared by using a Mann Whitney test
- 353 • Time to intubation / invasive mechanical ventilation in subgroups with baseline  
354 PaO<sub>2</sub>/FiO<sub>2</sub> > and < 100 mmHg (time frame: 28 days). The effect of the allocated  
355 treatment (high-flow oxygen vs. conventional oxygen therapy) on the cumulative  
356 incidence of intubation / invasive mechanical ventilation will be calculated with a  
357 Cox proportional hazard model according to baseline PaO<sub>2</sub>/FiO<sub>2</sub> > and < 100  
358 mmHg. Hazard ratios < 1 will indicate benefit with the use of High-Flow Oxygen  
359 Therapy and vice versa
- 360 • Requirement for intubation / invasive mechanical ventilation in subgroups with  
361 baseline IL-6 > and < 100 pg/mL (time frame: 28 days). Differences between  
362 groups will be compared by using a Mann Whitney test
- 363 • Time to intubation / invasive mechanical ventilation in subgroups with baseline IL-  
364 6 > and < 100 pg/mL (time frame: 28 days). The effect of the allocated treatment  
365 (high-flow oxygen vs. conventional oxygen therapy) on the cumulative incidence of  
366 intubation / invasive mechanical ventilation will be calculated with a Cox  
367 proportional hazard model according to baseline IL-6 > and < 100 pg/mL. Hazard  
368 ratios < 1 will indicate benefit with the use of High-Flow Oxygen Therapy and vice  
369 versa

- 370 • Requirement intubation / invasive mechanical ventilation in subgroups aged > and  
371 < 60 years (time frame: 28 days). Differences between groups will be compared by  
372 using a Mann Whitney test
- 373 • Time to intubation / invasive mechanical ventilation in subgroups aged > and < 60  
374 years (time frame: 28 days). The effect of the allocated treatment (high-flow oxygen  
375 vs. conventional oxygen therapy) on the cumulative incidence of intubation /  
376 invasive mechanical ventilation will be calculated with a Cox proportional hazard  
377 model according to aged > and < 60 years. Hazard ratios < 1 will indicate benefit  
378 with the use of High-Flow Oxygen Therapy and vice versa.
- 379 • Time to clinical recovery in subgroups with baseline PaO<sub>2</sub>/FiO<sub>2</sub> > and < 100 mmHg  
380 (time frame: 28 days). The effect of the allocated treatment (high-flow oxygen vs.  
381 conventional oxygen therapy) on the time to clinical recovery will be calculated  
382 with a Cox proportional hazard model according to baseline PaO<sub>2</sub>/FiO<sub>2</sub> > and < 100  
383 mmHg. Hazard ratios > 1 will indicate benefit with the use of High-Flow Oxygen  
384 Therapy and vice versa.
- 385 • Time to clinical recovery in subgroups with baseline IL-6 > and < 100 pg/mL (time  
386 frame: 28 days). The effect of the allocated treatment (high-flow oxygen vs.  
387 conventional oxygen therapy) on the time to clinical recovery will be calculated  
388 with a Cox proportional hazard model according to baseline IL-6 > and < 100  
389 pg/mL. Hazard ratios > 1 will indicate benefit with the use of High-Flow Oxygen  
390 Therapy and vice versa.
- 391 • Time to clinical recovery in subgroups aged > and < 60 years (time frame: 28 days).  
392 The effect of the allocated treatment (high-flow oxygen vs. conventional oxygen  
393 therapy) on the time to clinical recovery will be calculated with a Cox proportional  
394 hazard model according to age > and < 60 years. Hazard ratios > 1 will indicate  
395 benefit with the use of High-Flow Oxygen Therapy and vice versa.

396  
397

### 398 **7.3. Additional analysis (Post-Hoc Analysis)**

399 Sensitivity analysis

400 We will consider to perform some sensitivity analyses:

- 401 - Including just patients with confirmed SARS-CoV-2 infection by means of RT-  
402 PCR test.
- 403 - Including patients receiving the randomly allocated treatment (per-protocol  
404 analysis)

405 - Imputation analysis including patients excluded because early transfers to  
406 other hospitals because administrative reasons

407

#### 408 **7.4. Handling missing data**

409

##### 410 **For Primary outcomes**

411 The primary outcome is expected to be available in all patients. If death occurs during  
412 follow-up, data will be censored until last observation. In the case of lost of follow-up,  
413 the last report on the 7-category scale will be considered as the outcome.

414

##### 415 **For Covariates**

416 It is expected to collect information about all covariates for both primary and  
417 secondary outcomes. Nevertheless, in the case of missing data of variables needed to  
418 analyze effect modification, and this may have an effect the primary outcomes, then  
419 simple imputation will be performed using the median of the treatment group to  
420 which the observation belongs based on the information collected with complete data.

421 Data will not be imputed for secondary outcomes.

422

## 423 **8 INTERIM ANALYSIS**

424 A first and only interim analysis was conducted when the 28-day follow-up had been  
425 completed for the first 100 randomized patients. Database will be prepared and sent  
426 to the members of the Data Safety Monitoring Board (DSMB). An independent  
427 statistician will perform the analysis and will discuss it with the DSMB, who later will  
428 communicate results to the Steering Committee. Haybittle–Peto stopping boundaries  
429 (4) are a priori proposed as rules to continue or stop the trial. Thus, a P-value  
430 threshold of less than 0.001 will be considered to interrupt the trial for safety and a P-  
431 value threshold of less than 0.0001 to interrupt the trial for efficacy.

432

433

434 9 TABLES

435 9.1 Table 1. Patients characteristics at randomization

436

437

| Characteristic                                               | High-Flow Oxygen Therapy (n=xxx) | Conventional Oxygen Therapy (n=xxx) |
|--------------------------------------------------------------|----------------------------------|-------------------------------------|
| <b>Demographics</b>                                          |                                  |                                     |
| Age, median (IQR) - years                                    | xx (xx - xx)                     | xx (xx - xx)                        |
| Sex - No. (%)                                                |                                  |                                     |
| Men                                                          | xx (xx)                          | xx (xx)                             |
| Women                                                        | xx (xx)                          | xx (xx)                             |
| Body Mass Index, median (IQR) †                              | xx (xx - xx)                     | xx (xx - xx)                        |
| APACHE II                                                    | xx (xx - xx)                     | xx (xx - xx)                        |
| Testing for COVID-19, No. (%)                                |                                  |                                     |
| Positive on RT-PCR                                           | xx (xx)                          | xx (xx)                             |
| Negative on RT-PCR or unavailable                            | xx (xx)                          | xx (xx)                             |
| <b>Comorbidities, No. (%)</b>                                |                                  |                                     |
| Hypertension                                                 | xx (xx)                          | xx (xx)                             |
| Diabetes                                                     | xx (xx)                          | xx (xx)                             |
| Chronic Obstructive Pulmonary Disease                        | xx (xx)                          | xx (xx)                             |
| Heart Failure                                                | xx (xx)                          | xx (xx)                             |
| Chronic Renal Disease                                        | xx (xx)                          | xx (xx)                             |
| Cancer                                                       | xx (xx)                          | xx (xx)                             |
| Cirrhosis Child A-B                                          | xx (xx)                          | xx (xx)                             |
| <b>Previous medications, No. (%)</b>                         |                                  |                                     |
| Steroids                                                     | xx (xx)                          | xx (xx)                             |
| ACE inhibitor                                                | xx (xx)                          | xx (xx)                             |
| Angiotensin II Receptor Antagonist                           | xx (xx)                          | xx (xx)                             |
| Statins                                                      | xx (xx)                          | xx (xx)                             |
| <b>Characteristics at randomization</b>                      |                                  |                                     |
| Median time from symptom onset to randomization (IQR) - days | xx (xx - xx)                     | xx (xx - xx)                        |
| Median time from admission to                                | xx (xx - xx)                     | xx (xx - xx)                        |

|                                                             |              |              |
|-------------------------------------------------------------|--------------|--------------|
| randomization (IQR) - days                                  |              |              |
| SOFA score at randomization                                 | xx (xx - xx) | xx (xx - xx) |
| Respiratory status just before randomization                |              |              |
| Respiratory Rate, median (IQR), /min                        | xx (xx - xx) | xx (xx - xx) |
| PaO <sub>2</sub> /FiO <sub>2</sub> ratio, median (IQR)      | xx (xx - xx) | xx (xx - xx) |
| Received standard oxygen therapy before randomization       |              |              |
| Oxygen flow, median (IQR), L/min                            | xx (xx - xx) | xx (xx - xx) |
| PaO <sub>2</sub> with standard oxygen, median (IQR), mmHg   | xx (xx - xx) | xx (xx - xx) |
| PaCO <sub>2</sub> with standard oxygen, median (IQR), mmHg  | xx (xx - xx) | xx (xx - xx) |
| Score on Seven-Level Ordinal Scale - No. (%) ††             |              |              |
| 4. Hospitalized and receiving supplemental oxygen           | xx (xx)      | xx (xx)      |
| 5. Hospitalized in ICU and receiving oxygen supplementation | xx (xx)      | xx (xx)      |

438

439

440

441

442

443

444

445

446

447

448

449

450

451

452



## 9.2 Table 1S. Other patient characteristics at randomization

| Characteristic                                | High-Flow Oxygen Therapy<br>(n=xxx) | Conventional Oxygen Therapy<br>(n=xxx) | P   |
|-----------------------------------------------|-------------------------------------|----------------------------------------|-----|
| <b>Symptoms</b>                               |                                     |                                        |     |
| Fever - no. (%)                               | XX (XX.X)                           | XX (XX.X)                              | .XX |
| Odynophagia - no. (%)                         | XX (XX.X)                           | XX (XX.X)                              | .XX |
| Cough - no. (%)                               | XX (XX.X)                           | XX (XX.X)                              | .XX |
| Vomiting / diarrhea - no. (%)                 | XX (XX.X)                           | XX (XX.X)                              | .XX |
| Asthenia / adynamia - no. (%)                 | XX (XX.X)                           | XX (XX.X)                              | .XX |
| Anosmia / dysgeusia - no. (%)                 | XX (XX.X)                           | XX (XX.X)                              | .XX |
| Odynophagia - no. (%)                         | XX (XX.X)                           | XX (XX.X)                              | .XX |
| <b>Vital signs at admission, median (IQR)</b> |                                     |                                        |     |
| Systolic arterial pressure, mmHg              | XX (XX – XX)                        | XX (XX – XX)                           | .XX |
| Diastolic arterial pressure, mmHg             | XX (XX – XX)                        | XX (XX – XX)                           | .XX |
| Mean arterial pressure, mmHg                  | XX (XX – XX)                        | XX (XX – XX)                           | .XX |
| Heart rate, beats/min                         | XX (XX – XX)                        | XX (XX – XX)                           | .XX |
| Respiratory rate, breaths/min                 | XX (XX – XX)                        | XX (XX – XX)                           | .XX |
| <b>Laboratory, median (IQR)</b>               |                                     |                                        |     |
| pH                                            | X.XX (X.XX – X.XX)                  | X.XX (X.XX – X.XX)                     | .XX |
| PaCO <sub>2</sub> , mmHg                      | XX (XX – XX)                        | XX (XX – XX)                           | .XX |
| PaO <sub>2</sub> , mmHg                       | XX (XX – XX)                        | XX (XX – XX)                           | .XX |
| HCO <sub>3</sub> <sup>-</sup> , mmol/L        | XX.X (XX.X – XX.X)                  | XX.X (XX.X – XX.X)                     | .XX |

|                                                   |                             |                            |        |
|---------------------------------------------------|-----------------------------|----------------------------|--------|
| Base excess, mmol/L                               | X.XX (X.XX – X.XX)          | X.XX (X.XX – X.XX)         | .XX454 |
| PaO <sub>2</sub> /FiO <sub>2</sub> ratio          | XX (XX – XX)                | XX (XX – XX)               | .XX    |
| Lactate, mmol/L                                   | X.XX (X.XX – X.XX)          | X.XX (X.XX – X.XX)         | .XX455 |
| Hemoglobin, gr/dL                                 | XX.XX (XX.XX – XX.XX)       | XX.XX (XX.XX – XX.XX)      | .XX456 |
| Hematocrit, %                                     | XX.XX (XX.XX – XX.XX)       | XX.XX (XX.XX – XX.XX)      | .XX457 |
| Platelets, /mm <sup>3</sup>                       | XXX,XXX (XXX,XXX – XXX,XXX) | XXX,XX (XXX,XXX – XXX,XXX) | .XX458 |
| Prothrombin Time – PT, sec                        | XX.XX (XX.XX – XX.XX)       | XX.XX (XX.XX – XX.XX)      | .XX459 |
| Activated Partial Thromboplastin Time – aPTT, sec | XX.XX (XX.XX – XX.XX)       | XX.XX (XX.XX – XX.XX)      | .XX460 |
| Fibrinogen, mg/dL                                 | XX.XX (XX.XX – XX.XX)       | XX.XX (XX.XX – XX.XX)      | .XX462 |
| Leucocytes, /mm <sup>3</sup>                      | XX.XX (XX.XX – XX.XX)       | XX.XX (XX.XX – XX.XX)      | .XX463 |
| Neutrophils, /mm <sup>3</sup>                     | XX.XX (XX.XX – XX.XX)       | XX.XX (XX.XX – XX.XX)      | .XX464 |
| Lymphocytes, /mm <sup>3</sup>                     | XX.XX (XX.XX – XX.XX)       | XX.XX (XX.XX – XX.XX)      | .XX465 |
| Macrophages, /mm <sup>3</sup>                     | XX.XX (XX.XX – XX.XX)       | XX.XX (XX.XX – XX.XX)      | .XX466 |
| Neutrophil: Lymphocyte Ratio                      | XX.XX (XX.XX – XX.XX)       | XX.XX (XX.XX – XX.XX)      | .XX467 |
| Bilirubin, mg/dL                                  | XX.XX (XX.XX – XX.XX)       | XX.XX (XX.XX – XX.XX)      | .XX468 |
| Aspartate Amino Transferase – AST, IU/L           | XX.XX (XX.XX – XX.XX)       | XX.XX (XX.XX – XX.XX)      | .XX469 |
| Alanine Amino Transferase – ALT, IU/L             | XX.XX (XX.XX – XX.XX)       | XX.XX (XX.XX – XX.XX)      | .XX470 |
| C-Reactive Protein – CRP, mg/L                    | XX.XX (XX.XX – XX.XX)       | XX.XX (XX.XX – XX.XX)      | .XX471 |
| Lactate dehydrogenase – LDH, U/L                  | XX.XX (XX.XX – XX.XX)       | XX.XX (XX.XX – XX.XX)      | .XX472 |
| Ferritin, ng/mL                                   | XX.XX (XX.XX – XX.XX)       | XX.XX (XX.XX – XX.XX)      | .XX473 |
| D-dimer, µg/mL                                    | XX.XX (XX.XX – XX.XX)       | XX.XX (XX.XX – XX.XX)      | .XX474 |
| IL-6                                              | XX.XX (XX.XX – XX.XX)       | XX.XX (XX.XX – XX.XX)      | .XX475 |
| IL-8                                              | XX.XX (XX.XX – XX.XX)       | XX.XX (XX.XX – XX.XX)      | .XX476 |
| Creatinine, mg/dL                                 | XX.XX (XX.XX – XX.XX)       | XX.XX (XX.XX – XX.XX)      | .XX477 |
| Blood Nitrogen Urea – BUN, mg/dL                  | XX.XX (XX.XX – XX.XX)       | XX.XX (XX.XX – XX.XX)      | .XX478 |
| Troponin, ng/mL                                   | XX.XX (XX.XX – XX.XX)       | XX.XX (XX.XX – XX.XX)      | .XX479 |

480

481

482

483

9.3. Table 2. Primary and Secondary Outcomes

484  
485  
486  
487

|                                              | Overall                                                |                                     | Ordinal Score at Baseline                              |                                    |                                                        |                                    |
|----------------------------------------------|--------------------------------------------------------|-------------------------------------|--------------------------------------------------------|------------------------------------|--------------------------------------------------------|------------------------------------|
|                                              |                                                        | 4                                   |                                                        |                                    | 5                                                      |                                    |
|                                              | High-Flow Oxygen Therapy (n=XXX)                       | Conventional Oxygen Therapy (n=XXX) | High-Flow Oxygen Therapy (n=XX)                        | Conventional Oxygen Therapy (n=XX) | High-Flow Oxygen Therapy (n=XX)                        | Conventional Oxygen Therapy (n=XX) |
| <b>Primary Outcomes</b>                      |                                                        |                                     |                                                        |                                    |                                                        |                                    |
| <b>Intubation over first 28 days</b>         |                                                        |                                     |                                                        |                                    |                                                        |                                    |
| No. of intubations by day 28                 | XX                                                     | XX                                  | XX                                                     | XX                                 | XX                                                     | XX                                 |
| Hazard ratio (95%CI) for data through day 28 | X.XX (X.XX-X.XX) [p=X.XX] <sup>[1]</sup> <sub>SE</sub> |                                     | X.XX (X.XX-X.XX) [p=X.XX] <sup>[1]</sup> <sub>SE</sub> |                                    | X.XX (X.XX-X.XX) [p=X.XX] <sup>[1]</sup> <sub>SE</sub> |                                    |
| <b>Clinical Recovery §</b>                   |                                                        |                                     |                                                        |                                    |                                                        |                                    |
| No. of recoveries                            | XX                                                     | XX                                  | XX                                                     | XX                                 | XX                                                     | XX                                 |
| Median time to recovery (95%CI) - days       | XX (XX -XX)                                            | XX (XX -XX)                         | XX (XX -XX)                                            | XX (XX -XX)                        | XX (XX -XX)                                            | XX (XX -XX)                        |
| Hazard ratio (95%CI) for data through day 28 | X.XX (X.XX-X.XX) [p=X.XX] <sup>[1]</sup> <sub>SE</sub> |                                     | X.XX (X.XX-X.XX) [p=X.XX] <sup>[1]</sup> <sub>SE</sub> |                                    | X.XX (X.XX-X.XX) [p=X.XX] <sup>[1]</sup> <sub>SE</sub> |                                    |

| Secondary Outcomes                              |                                                         |                                                         |                                                         |                                                         |                                                         |                                                         |                                                         |  |
|-------------------------------------------------|---------------------------------------------------------|---------------------------------------------------------|---------------------------------------------------------|---------------------------------------------------------|---------------------------------------------------------|---------------------------------------------------------|---------------------------------------------------------|--|
| Ordinal score at day 28<br>- no. (%) f f        |                                                         |                                                         |                                                         |                                                         |                                                         |                                                         |                                                         |  |
| 1                                               | XX (XX.X)                                               |  |
| 2                                               | XX (XX.X)                                               |  |
| 3                                               | XX (XX.X)                                               |  |
| 4                                               | XX (XX.X)                                               |  |
| 5                                               | XX (XX.X)                                               |  |
| 6                                               | XX (XX.X)                                               |  |
| 7                                               | XX (XX.X)                                               |  |
| Odds ratio (95%CI)                              | X.XX (X.XX-X.XX) [p=X.XX] <sup>[T]</sup> <sub>SEp</sub> |  |
| <b>Mortality</b>                                |                                                         |                                                         |                                                         |                                                         |                                                         |                                                         |                                                         |  |
| <b>At day 14</b>                                |                                                         |                                                         |                                                         |                                                         |                                                         |                                                         |                                                         |  |
| No. of patients (%)                             | XX (XX.X)                                               |  |
| Hazard Ratio (95%CI)<br>for data through day 28 | X.XX (X.XX-X.XX) [p=X.XX] <sup>[T]</sup> <sub>SEp</sub> |                                                         | X.XX (X.XX-X.XX) [p=X.XX] <sup>[T]</sup> <sub>SEp</sub> |                                                         | X.XX (X.XX-X.XX) [p=X.XX] <sup>[T]</sup> <sub>SEp</sub> |                                                         | X.XX (X.XX-X.XX) [p=X.XX] <sup>[T]</sup> <sub>SEp</sub> |  |
| <b>At day 28</b>                                |                                                         |                                                         |                                                         |                                                         |                                                         |                                                         |                                                         |  |

|                                                            |                                                            |                                                            |                                                            |                                                            |                                                            |                                                            |
|------------------------------------------------------------|------------------------------------------------------------|------------------------------------------------------------|------------------------------------------------------------|------------------------------------------------------------|------------------------------------------------------------|------------------------------------------------------------|
| No. of patients (%)                                        | XX (XX.X)                                                  |
| Hazard Ratio (95%CI)<br>for data through day 28            | X.XX (X.XX-X.XX) [p=X.XX] <sup>[T1]</sup> <sub>[SEP]</sub> |
| <b>Intubation</b>                                          |                                                            |                                                            |                                                            |                                                            |                                                            |                                                            |
| <b>At day 7</b>                                            |                                                            |                                                            |                                                            |                                                            |                                                            |                                                            |
| No. of patients (%)                                        | XX (XX.X)                                                  |
| Hazard Ratio (95%CI)<br>for data through day 28            | X.XX (X.XX-X.XX) [p=X.XX] <sup>[T1]</sup> <sub>[SEP]</sub> |
| <b>Intubation</b>                                          |                                                            |                                                            |                                                            |                                                            |                                                            |                                                            |
| <b>At day 14</b>                                           |                                                            |                                                            |                                                            |                                                            |                                                            |                                                            |
| No. of patients (%)                                        | XX (XX.X)                                                  |
| Hazard Ratio (95%CI)<br>for data through day 28            | X.XX (X.XX-X.XX) [p=X.XX] <sup>[T1]</sup> <sub>[SEP]</sub> |
| Time elapsed from<br>randomization to<br>Intubation, hours | X.XX (X.XX-X.XX)                                           |
| Adjusted odds ratio<br>(95% CI) for data<br>through day 28 | X.XX (X.XX-X.XX) [p=X.XX] <sup>[T1]</sup> <sub>[SEP]</sub> |
| Ventilation-free days<br>at day-28, days (IQR)             | XX (XX - XX)                                               |

|                                                            |                                                             |              |                                                             |              |                                                             |              |
|------------------------------------------------------------|-------------------------------------------------------------|--------------|-------------------------------------------------------------|--------------|-------------------------------------------------------------|--------------|
| Adjusted odds ratio<br>(95% CI) for data<br>through day 28 | X.XX (X.XX-X.XX) [p=X.XX] <sup>[1]</sup> <sub>\$SEP\$</sub> |              | X.XX (X.XX-X.XX) [p=X.XX] <sup>[1]</sup> <sub>\$SEP\$</sub> |              | X.XX (X.XX-X.XX) [p=X.XX] <sup>[1]</sup> <sub>\$SEP\$</sub> |              |
| Renal replacement<br>therapy-free days, , days<br>(IQR)    | XX (XX - XX)                                                | XX (XX - XX) | XX (XX - XX)                                                | XX (XX - XX) | XX (XX - XX)                                                | XX (XX - XX) |
| Adjusted odds ratio<br>(95% CI) for data<br>through day 28 | X.XX (X.XX-X.XX) [p=X.XX] <sup>[1]</sup> <sub>\$SEP\$</sub> |              | X.XX (X.XX-X.XX) [p=X.XX] <sup>[1]</sup> <sub>\$SEP\$</sub> |              | X.XX (X.XX-X.XX) [p=X.XX] <sup>[1]</sup> <sub>\$SEP\$</sub> |              |
| Length of Stay -<br>Intensive Care Unit,<br>days (IQR)     | XX (XX - XX)                                                | XX (XX - XX) | XX (XX - XX)                                                | XX (XX - XX) | XX (XX - XX)                                                | XX (XX - XX) |
| Adjusted odds ratio<br>(95% CI) for data<br>through day 28 | X.XX (X.XX-X.XX) [p=X.XX] <sup>[1]</sup> <sub>\$SEP\$</sub> |              | X.XX (X.XX-X.XX) [p=X.XX] <sup>[1]</sup> <sub>\$SEP\$</sub> |              | X.XX (X.XX-X.XX) [p=X.XX] <sup>[1]</sup> <sub>\$SEP\$</sub> |              |
| Length of Stay - Hospital,<br>days (IQR)                   | XX (XX - XX)                                                | XX (XX - XX) | XX (XX - XX)                                                | XX (XX - XX) | XX (XX - XX)                                                | XX (XX - XX) |
| Adjusted odds ratio<br>(95% CI) for data<br>through day 28 | X.XX (X.XX-X.XX) [p=X.XX] <sup>[1]</sup> <sub>\$SEP\$</sub> |              | X.XX (X.XX-X.XX) [p=X.XX] <sup>[1]</sup> <sub>\$SEP\$</sub> |              | X.XX (X.XX-X.XX) [p=X.XX] <sup>[1]</sup> <sub>\$SEP\$</sub> |              |

488  
489  
490  
491  
492  
493  
494  
495  
496  
497  
498

499 **9.4 Table 3. Time from randomization to intubation / invasive mechanical ventilation support / additional**  
500 **respiratory support maneuvers**

501

|                                                                                   | <b>High-Flow Oxygen Therapy (n=XXX)</b> | <b>Conventional Oxygen Therapy (n=XXX)</b> | <b>P value</b> |
|-----------------------------------------------------------------------------------|-----------------------------------------|--------------------------------------------|----------------|
| No. of intubations by day 28, (%)                                                 | XX (XX.X)                               | XX (XX.X)                                  | 0.026 †        |
| Time elapsed from randomization to Intubation, hours                              | XX.X (XX.X - XX.X)                      | XX.X (XX.X - XX.X)                         | 0.69           |
| Time elapsed with FiO <sub>2</sub> > 0.70 from randomization to Intubation, hours | XX.X (XX.X - XX.X)                      | XX.X (XX.X - XX.X)                         | < 0.001        |
| Awake prone position, n (%)                                                       | XX (XX.X)                               | XX (XX.X)                                  | 0.12           |
| Time in awake prone position, hours (interquartile range)                         | XX.X (XX.X - XX.X)                      | XX.X (XX.X - XX.X)                         | 0.35           |
| Prone position during mechanical ventilation, n (%)                               | XX (XX.X)                               | XX (XX.X)                                  | 0.08           |
| Time in prone position during mechanical ventilation, hours (interquartile range) | XX.X (XX.X - XX.X)                      | XX.X (XX.X - XX.X)                         | 0.90           |
| Neuromuscular paralysis, n (% from total population)                              | XX (XX.X)                               | XX (XX.X)                                  | 0.04           |

502

503

504

505

506 **REFERENCES**

- 507 1. Frat JP, Thille AW, Mercat A, Girault C, Ragot S, Perbet S, et al. High-flow oxygen  
508 through nasal cannula in acute hypoxemic respiratory failure. *N Engl J Med.*  
509 2015;372(23):2185-96.
- 510 2. Grambsch PM, Therneau TM. Proportional hazards tests and diagnostics based on  
511 weighted residuals. *Biometrika.* 1994;81(3):515-26.
- 512 3. Vincent JL, de Mendonça A, Cantraine F, Moreno R, Takala J, Suter PM, et al. Use of the SOFA  
513 score to assess the incidence of organ dysfunction/failure in intensive care units: results of a  
514 multicenter, prospective study. Working group on "sepsis-related problems" of the European  
515 Society of Intensive Care Medicine. *Crit Care Med.* 1998;26(11):1793-800.
- 516 4. Haybittle JL. Repeated assessment of results in clinical trials of cancer treatment. *Br J*  
517 *Radiol.* 1971;44(526):793-7.

518  
519  
520  
521  
522  
523  
524  
525  
526  
527  
528  
529  
530  
531  
532  
533  
534  
535  
536  
537  
538  
539  
540  
541  
542  
543



544

545

## **Statistical Analysis Plan**

546

### **(SAP)**

547

548 **HIGH-FLOW vs. CONVENTIONAL OXYGEN THERAPY IN PATIENTS WITH ACUTE**  
549 **RESPIRATORY FAILURE DUE TO SARS-CoV-2: The HiFlo-COVID RANDOMIZED**  
550 **CLINICAL TRIAL**

551

552

553

**The HiFlo-COVID collaborative group**

554

555

556

557

558

## **SUMMARY OF CHANGES**

559

560

561

562

563

564

565

566

567

568

569

570

571

572

573 **Versions and dates**

574

---

575 Statistical Analysis Plan version 1.0

576 Version date: 16th July, 2020

577 Refers to protocol Version 1.0

578

---

579 Statistical Analysis Plan version 2.0

580 Version date: 02nd January, 2021

581 Refers to protocol Version 3.0

582

---

583

584

585 **Summary of changes from SAP version 1.0 to version 2.0**

586

587 1. Sample Size

588

589 Changes: Increasing of sample size

590

591 In the Protocol amendment 1.0, sample size had been increased from 196 to 200  
592 patients (i.e., 2 more by arm) aiming to compensate a potential 2% of losses.  
593 Nevertheless, due to the particular health system conditions during pandemic, an  
594 important number of participants (n=18, representing the 9.2% of the total sample  
595 size) had been transferred to other hospitals within 72 hours from randomization at  
596 the time in which Protocol amendment 3.0 was being constructed. After an extensive  
597 discussion with the Ethical Committee and trying to favor the possibility that results  
598 of HiFlo-Covid trial keep sufficient power and consequently, more reliable results, the

599 number total of randomized patients was newly adjusted up to complete a total of 220  
600 participants.

601

602 2. Objectives and Outcomes

603

604 Changes: Re-arrangement of Objectives and Outcomes list

605

606 Primary and secondary outcomes were preserved as initially conceived in the  
607 Protocol version 1.0 and Statistical Plan Analysis version 1.0. Nevertheless, for a  
608 better understanding, secondary and tertiary outcomes, and predefined subgroups  
609 were listed separately

610 Time-course for labs was shortened to 7 days because median length of stay < 14 days  
611 observed during interim analysis.

612
